# Supplementary material for: Proteomic-Based Detection of a Protein Cluster Dysregulated during Cardiovascular Development Identifies Biomarkers of Congenital Heart Defects
Source: PLoS One. 2009 Jan 19;4(1):e4221. doi: 10.1371/journal.pone.0004221 (PMC2626248; doi:10.1371/journal.pone.0004221)
Supplement: Table S1 — (2.75 MB XLS) [file pone.0004221.s001.xls]

## Sheet: HG.txt
Supplemental Table 1. Matrix Containing the 12,908 peaks from the LC-MS Study*
row	m/z	rt	t-test_HG	t-test_VEGF	t-test_NO	logratio_HG	logratio_VEGF	logratio_NO	dysreg_HG	dysreg_VEGF	dysreg_NO
1	728.395	1450.86	0.0109607	0.00851726	0.00180899	1.53639	1.24226	1.42148	1	1	1
2	647.31	1210.03	0.0248961	0.00673899	0.0202183	-1.02028	-1.39444	-1.09678	1	1	1
3	854.339	1593.04	0.0480819	0.00583163	0.0364076	1.12861	1.41283	1.11989	1	1	1
4	746.156	2937.9	0.0154476	0.00272551	0.00879586	1.12137	2.15008	1.3455	1	1	1
5	952.365	1814.36	0.0193002	0.00469148	0.00683065	1.09711	1.2829	1.03695	1	1	1
6	394.708	1175.81	0.00896533	0.0475496	0.0170973	1.40568	1.03062	1.10969	1	1	1
7	989.527	1176.22	0.00806486	0.0297255	0.0474472	1.27551	1.06944	1.00052	1	1	1
8	641.302	1860.79	0.0197113	0.00947846	0.0250025	1.46994	1.28088	1.0637	1	1	1
9	385.139	2274.32	0.0452096	0.00306201	0.00441148	1.21081	1.31563	1.35877	1	1	1
10	983.033	1552.58	0.047606	0.0306051	0.00964398	1.97873	2.14898	1.81641	1	1	1
11	821.337	1356.37	0.0125265	0.00230227	0.00341384	1.79102	2.45468	2.08269	1	1	1
12	822.338	1353.68	0.0202798	0.00199317	0.0064416	1.52199	2.17334	1.71949	1	1	1
13	823.337	1356.63	0.0147273	0.00131589	0.00605622	1.22715	1.98595	1.38458	1	1	1
14	525.758	1358.91	0.0444308	0.0187599	0.00401276	1.13469	1.10784	1.03392	1	1	1
15	495.754	1172.35	0.0139187	0.0209474	0.0122687	1.27503	1.13083	1.43155	1	1	1
16	875.437	1169.05	0.01076	0.0196307	0.016515	1.21839	1.16271	1.07284	1	1	1
17	446.697	837.452	0.0292628	0.00461542	0.00156408	1.27016	1.1102	1.01818	1	1	1
18	564.033	2367.64	0.0445267	0.0260819	0.0180415	1.04181	1.47429	1.07076	1	1	1
19	963.493	1888.13	0.027458	0.00824836	0.0123839	1.77183	2.05663	1.75977	1	1	1
20	641.3	1845.77	0.0276359	0.0102978	0.0250853	1.1663	1.1824	1.04084	1	1	1
21	444.22	1783.46	0.0372398	0.00932413	0.00536694	1.47473	1.20173	1.4024	1	1	1
22	715.352	1766.48	0.0259231	0.0201882	0.0324953	2.82572	2.46326	2.40898	1	1	1
23	456.278	1785.7	0.0409793	0.0154707	0.0031593	1.00406	1.03687	1.20679	1	1	1
24	1026.43	1741.83	0.0168265	0.00353229	0.000766021	1.20411	1.36329	1.51882	1	1	1
25	825.378	1738.06	0.0169914	0.00459845	0.00391799	1.08502	1.31568	1.11064	1	1	1
26	653.824	1736.55	0.0449217	0.0230735	0.0158814	1.98398	1.44538	1.70234	1	1	1
27	562.274	1677.85	0.013888	0.00144209	0.00123281	1.11859	1.96582	1.61336	1	1	1
28	614.319	1442.54	0.0425415	0.0130779	0.0182578	1.38802	1.49404	1.45037	1	1	1
29	1000.45	1659.1	0.0140118	0.00329138	0.00465389	1.28187	1.8836	1.60964	1	1	1
30	727.393	1441.51	0.0367718	0.0131688	0.018694	1.35251	1.49628	1.43536	1	1	1
31	615.318	1440.25	0.0347403	0.0148375	0.0143584	1.20441	1.29466	1.23103	1	1	1
32	805.35	1496.28	0.023869	0.0196996	0.0216765	1.01642	1.10065	1.07613	1	1	1
33	870.449	1487.87	0.0207289	0.00368362	0.00915369	1.42612	2.07618	1.97739	1	1	1
34	871.45	1486.84	0.00526068	0.00210511	0.00483715	1.22011	1.82156	1.91771	1	1	1
35	885.411	1434.69	0.00465645	0.00039793	0.0010782	1.42499	1.81637	1.54814	1	1	1
36	888.411	1431.36	0.0097278	0.00125275	0.00935325	1.45748	1.85442	1.3996	1	1	1
37	571.3	1386.6	0.0160703	0.00107716	0.0182292	1.28169	1.00615	1.05198	1	1	1
38	670.814	1313.14	0.0070636	0.00750758	0.0110915	2.45297	2.28842	1.93519	1	1	1
39	482.723	838.627	0.00964118	0.00201944	0.000856953	1.29926	1.17066	1.27942	1	1	1
40	1025.44	1733.57	0.0273516	0.0123269	0.000895263	1.22624	1.24282	1.60987	1	1	1
41	561.274	1671.9	0.038424	0.00202324	0.00134675	1.2739	2.2381	2.04199	1	1	1
42	534.283	1382.21	0.0173594	0.0141322	0.0398163	-1.03177	-1.08315	-0.921369	1	1	0
43	657.317	1048.82	0.0458692	0.027423	0.47339	-1.27535	-1.47235	-0.484391	1	1	0
44	678.784	1930.51	0.00783973	0.0372891	0.0726133	2.09612	1.41827	0.354779	1	1	0
45	988.526	1176.79	0.00620609	0.0342956	0.0453396	1.49271	1.29668	0.995909	1	1	0
46	383.016	3484.45	0.0118839	0.00124001	0.130568	1.16576	1.92913	0.879125	1	1	0
47	738.361	1923.86	0.0217096	0.042195	0.0962111	1.92715	1.44916	0.463989	1	1	0
48	720.343	1892.48	0.0432286	0.0360282	0.375728	2.19927	1.03049	0.461973	1	1	0
49	650.646	1096.77	0.0450622	0.0192134	0.107445	2.11554	1.57167	0.847288	1	1	0
50	726.321	1815.4	0.022209	0.00166489	0.0313024	1.27891	1.66055	0.947608	1	1	0
51	715.86	1768.21	0.0233879	0.0184371	0.0942188	3.16645	2.90467	2.31568	1	1	0
52	714.82	1634.39	0.0461912	0.031751	0.102638	1.95291	1.68975	1.37192	1	1	0
53	432.737	1440.39	0.0368842	0.104893	0.0420668	-1.01522	-0.724156	-1.01008	1	0	1
54	411.283	2611.43	0.0438799	0.306113	0.0294478	-1.34637	-0.650779	-1.68088	1	0	1
55	714.362	1498.43	0.0378517	0.22654	0.0488937	-4.10356	-1.49606	-4.12053	1	0	1
56	734.35	1183.22	0.0467952	0.087591	0.0464245	-1.09452	-0.976434	-1.1282	1	0	1
57	690.331	1565.12	0.0355339	0.726172	0.0456303	-1.21869	-0.271688	-1.22355	1	0	1
58	518.263	1380.21	0.0214752	0.185031	0.041251	-1.47291	-0.797339	-1.28375	1	0	1
59	644.8	1506.88	0.0237563	0.14682	0.01801	1.13232	0.609168	1.00075	1	0	1
60	494.758	1167.25	0.0160802	0.219283	0.0449289	1.39719	0.802231	1.33499	1	0	1
61	434.741	1181.07	0.0340553	0.110404	0.0264775	1.08312	0.871365	1.18108	1	0	1
62	871.388	1905.97	0.00298271	0.0656012	0.0492226	1.16839	2.33162	1.15122	1	0	1
63	929.527	1780.19	0.0456705	0.0325425	0.0106444	1.05621	0.990782	1.19484	1	0	1
64	706.344	1767.25	0.0303687	0.0427386	0.0498489	1.45281	0.946341	1.08901	1	0	1
65	552.289	1652.71	0.0396416	0.208922	0.0363484	1.71667	0.784891	1.50217	1	0	1
66	535.803	1452.23	0.0236443	0.058382	0.0293804	1.55698	1.11682	1.24806	1	0	1
67	788.403	1322.69	0.00707411	0.0976616	0.00180986	1.05381	0.729324	1.08275	1	0	1
68	681.297	842.51	0.0277203	0.355896	0.0225357	1.01971	0.451989	1.12553	1	0	1
69	394.099	1734.84	0.0319606	0.217675	0.167535	-1.06279	-0.55237	-0.650948	1	0	0
70	393.089	1715.61	0.0420359	0.146266	0.119173	-1.32883	-0.861563	-0.976034	1	0	0
71	805.359	1402.41	0.0217456	0.227362	0.0843851	-1.68771	-0.828641	-1.11727	1	0	0
72	629.29	1240.98	0.0279076	0.114736	0.0779437	-1.69578	-1.1964	-1.28589	1	0	0
73	823.364	1264.85	0.0417013	0.406632	0.0693749	-1.26132	-0.570084	-1.14719	1	0	0
74	612.066	1231.78	0.0488685	0.0975632	0.157876	-1.47057	-1.14358	-0.91757	1	0	0
75	431.277	2261.02	0.0309682	0.414515	0.0734355	-1.66253	-0.54114	-1.30934	1	0	0
76	877.704	1997.55	0.0402059	0.0936417	0.215854	1.83803	1.30121	0.379765	1	0	0
77	622.677	1430.17	0.0313276	0.312297	0.696875	1.01148	1.01007	-0.0732431	1	0	0
78	762.402	1912.8	0.0469747	0.189779	0.832244	1.05932	0.540319	0.0350732	1	0	0
79	959.8	1849.31	0.0388907	0.229438	0.205309	1.88929	1.077	0.865124	1	0	0
80	971.004	1742.76	0.0431746	0.167688	0.0749261	1.31247	1.17327	1.0683	1	0	0
81	757.367	1601.67	0.0167439	0.0947815	0.750809	1.55097	1.28373	0.204047	1	0	0
82	611.783	1594.25	0.005706	0.179035	0.274801	1.03176	0.511249	0.36061	1	0	0
83	559.761	937.142	0.015616	0.256092	0.246698	1.26606	0.379401	0.417801	1	0	0
84	449.234	1548.62	0.0364803	0.211421	0.100175	-1.63896	-1.04477	-1.27628	1	0	0
85	644.805	1533.39	0.0144471	0.312614	0.044941	1.12674	0.417416	0.694369	1	0	0
86	703.333	1428.99	0.0108418	0.0871612	0.418904	-1.5324	-0.95761	0.813296	1	0	0
87	822.356	1299.66	0.0439709	0.108898	0.530062	-1.78926	-1.26585	-0.493987	1	0	0
88	495.766	1561.4	0.0066389	0.116129	0.0827511	1.19315	0.641097	0.6076	1	0	0
89	674.799	1288.44	0.0130456	0.0569425	0.161977	1.6667	1.22508	0.809107	1	0	0
90	675.818	1267.1	0.0119732	0.138839	0.0725904	1.53167	0.742638	1.01363	1	0	0
91	674.796	1264.07	0.0294941	0.314831	0.173658	1.47548	0.606507	0.876699	1	0	0
92	680.311	2042.94	0.0418686	0.239663	0.927708	1.19832	1.87395	-0.033288	1	0	0
93	552.769	2049.7	0.0403422	0.0395364	0.241267	1.13773	0.936493	0.685572	1	0	0
94	851.958	2055.7	0.0401911	0.142167	0.298577	1.33825	0.946936	0.648851	1	0	0
95	830.771	2048.7	0.0429604	0.134541	0.349202	1.38521	1.26687	0.738947	1	0	0
96	851.438	2055.56	0.0465228	0.149783	0.352364	1.15269	0.945186	0.592867	1	0	0
97	680.821	2033.67	0.0301364	0.101952	0.367564	1.11918	1.64357	0.421717	1	0	0
98	578.745	1944.31	0.0217794	0.0169226	0.0342526	1.04205	0.854528	0.420375	1	0	0
99	727.841	1803.46	0.0194221	0.0643585	0.0687069	1.94581	1.07147	0.767662	1	0	0
100	729.896	1822.47	0.0396131	0.0611893	0.0976682	1.0818	0.68926	0.486187	1	0	0
101	833.942	1769.65	0.0346566	0.146518	0.198917	1.03078	0.64171	0.54466	1	0	0
102	888.906	1710.85	0.0383014	0.158695	0.121941	1.44901	0.955684	1.11548	1	0	0
103	745.837	1589.91	0.0434268	0.204352	0.164687	1.27722	0.497579	0.466893	1	0	0
104	719.805	1340.3	0.0152149	0.104451	0.090566	1.18146	0.755174	0.763683	1	0	0
105	651.99	1324.51	0.0401831	0.27432	0.361229	1.30675	0.856097	0.720572	1	0	0
106	385.231	1100.13	0.0165103	0.315701	0.105478	-1.19866	-0.441564	-0.73282	1	0	0
107	763.754	814.816	0.0454696	0.17297	0.273035	1.44894	0.877197	1.41726	1	0	0
108	487.263	1253.38	0.0427327	0.0689603	0.174053	1.2762	0.933489	0.749991	1	0	0
109	578.276	1009.84	0.00740601	0.363515	0.418709	1.29922	0.452085	0.338307	1	0	0
110	679.303	2045.97	0.0389062	0.225284	0.720854	1.88213	2.77741	0.203837	1	0	0
111	679.782	2046.67	0.00869432	0.257214	0.536103	1.74493	2.83855	0.375794	1	0	0
112	679.787	2033.62	0.0261158	0.224493	0.525224	1.97429	2.55302	0.666572	1	0	0
113	601.775	1933.13	0.0416998	0.114454	0.738933	1.28822	0.615674	0.0804303	1	0	0
114	959.17	1855.09	0.0302335	0.150045	0.791532	2.0972	0.946153	0.0989589	1	0	0
115	720.811	1895.37	0.0282982	0.136203	0.540401	1.37933	1.52358	0.32046	1	0	0
116	812.867	1899.07	0.0456481	0.132465	0.500496	1.57878	0.960011	0.24919	1	0	0
117	871.889	1877.59	0.0201965	0.316062	0.854389	1.29299	1.84237	-0.069019	1	0	0
118	923.94	1767.22	0.0308042	0.199307	0.0782876	1.82897	1.11351	0.928497	1	0	0
119	923.363	1769.13	0.0294219	0.23168	0.11676	2.01132	1.28612	1.15749	1	0	0
120	922.845	1765.42	0.0374888	0.286494	0.121777	1.94842	0.985938	1.29309	1	0	0
121	635.295	1517.79	0.0028191	0.182851	0.0929841	1.54183	0.707349	0.924206	1	0	0
122	662.303	1551.76	0.00952203	0.144865	0.0986163	1.08737	0.747233	0.929462	1	0	0
123	466.722	1601.04	0.00460466	0.0422282	0.0303685	1.0382	0.69993	0.748888	1	0	0
124	540.261	1559.71	0.0199378	0.287938	0.670396	1.06348	1.78522	0.0876682	1	0	0
125	703.82	1488.52	0.0336925	0.527238	0.267792	1.40372	0.495883	0.757145	1	0	0
126	652.777	1551.58	0.0163521	0.162073	0.0410703	1.24642	0.594362	0.729151	1	0	0
127	604.789	1563.28	0.0298061	0.684326	0.30477	1.22814	-0.147577	0.376062	1	0	0
128	635.79	1515.34	0.00568186	0.191906	0.235464	1.16037	0.569875	0.581309	1	0	0
129	698.849	1514.26	0.0340536	0.0378831	0.0479124	1.0432	0.951255	0.847212	1	0	0
130	1104.04	1315.35	0.0381739	0.198984	0.0841976	1.34429	0.800801	1.04498	1	0	0
131	723.342	1291.26	0.0320657	0.241692	0.173121	1.76343	0.86275	1.20334	1	0	0
132	722.844	1293.56	0.0320434	0.321798	0.205846	1.87692	0.839875	1.25775	1	0	0
133	656.822	1274.87	0.0212931	0.53961	0.319221	1.33787	0.429412	0.635165	1	0	0
134	585.625	1343.6	0.0276294	0.465496	0.300847	1.44544	0.523912	0.636455	1	0	0
135	671.318	1292.77	0.0310462	0.453743	0.45155	1.26325	0.462204	0.426801	1	0	0
136	771.862	1342.28	0.00938959	0.241005	0.103992	1.32398	0.673741	0.661036	1	0	0
137	585.947	1343.83	0.0243537	0.3059	0.154403	1.55474	0.637873	0.82561	1	0	0
138	670.806	1290.73	0.0152404	0.304173	0.239511	1.68126	0.741126	0.75706	1	0	0
139	603.78	1245.06	0.0286626	0.478825	0.179906	1.00189	0.328983	0.66834	1	0	0
140	842.316	1332.89	0.019589	0.0686836	0.127546	1.94211	1.20025	1.35334	1	0	0
141	614.307	1329.54	0.0494267	0.105556	0.0523104	-2.61907	-1.82307	-3	1	0	0
142	843.338	1333.73	0.0413457	0.078459	0.0827625	1.29983	0.744856	0.804563	1	0	0
143	723.852	1292.99	0.0361638	0.252956	0.135141	1.84242	0.862183	1.39842	1	0	0
144	549.289	1289.8	0.0147729	0.245017	0.0234299	1.09029	0.318136	0.705114	1	0	0
145	548.799	1293.77	0.0465454	0.198695	0.0673849	1.30469	0.567562	1.02244	1	0	0
146	713.35	1241.27	0.0178377	0.150127	0.0496706	1.18819	0.654624	0.869096	1	0	0
147	576.778	1198.12	0.0282072	0.112163	0.123578	1.32509	0.975529	1.19295	1	0	0
148	722.342	1181.6	0.039897	0.0994708	0.228676	1.22045	1.12877	0.790944	1	0	0
149	441.243	1148.48	0.000441125	0.345541	0.140733	1.20988	0.498175	0.528723	1	0	0
150	865.875	1248.46	0.028917	0.397091	0.227027	1.79207	0.719755	1.15447	1	0	0
151	943.046	978.816	0.0379406	0.239134	0.192651	1.32806	1.11782	1.3732	1	0	0
152	607.782	1209.72	0.0271895	0.151315	0.231235	1.07221	0.621597	0.377204	1	0	0
153	485.755	1175.42	0.00495445	0.0446952	0.0102089	1.07235	0.652222	0.932013	1	0	0
154	561.757	1114.53	0.0128265	0.213796	0.0279759	1.18411	0.638567	0.997921	1	0	0
155	446.728	1034.56	0.0335902	0.052376	0.121441	1.0422	0.596888	0.649954	1	0	0
156	739.346	1041.84	0.0437865	0.903688	0.655343	1.19487	-0.0495478	0.231651	1	0	0
157	830.378	1058.35	0.0428245	0.0258351	0.0521294	1.02466	0.825015	0.875702	1	0	0
158	521.249	883.448	0.0364064	0.0785049	0.354749	1.06232	0.769057	0.483958	1	0	0
159	557.271	859.91	0.0360827	0.183811	0.156284	1.22645	0.711891	0.837934	1	0	0
160	567.734	857.847	0.015827	0.0865237	0.0979744	1.42849	1.11956	1.33429	1	0	0
161	717.784	878.924	0.0221262	0.111373	0.0807886	2.61769	1.33548	2.68671	1	0	0
162	557.772	858.887	0.0337563	0.123519	0.0823958	1.34537	0.908584	1.10874	1	0	0
163	548.09	765.139	0.0494581	0.0551454	0.0685871	1.13769	1.1744	1.51852	1	0	0
164	738.364	1897.57	0.0287612	0.107702	0.192418	1.48645	1.24339	0.853935	1	0	0
165	587.799	1867.06	0.0296993	0.0983217	0.110872	2.76812	1.65502	1.56989	1	0	0
166	588.293	1867.67	0.0420643	0.0632868	0.110186	1.68341	1.17671	0.857554	1	0	0
167	745.878	1829.84	0.0492561	0.127488	0.156312	2.08752	1.72144	1.60158	1	0	0
168	728.334	1797.3	0.0268503	0.166275	0.166253	1.2345	0.516355	0.492196	1	0	0
169	1013.49	1763.48	0.0443834	0.0545994	0.0557226	1.27858	1.10966	1.1394	1	0	0
170	706.858	1766.75	0.0494962	0.106263	0.0995989	1.53778	0.992475	0.956971	1	0	0
171	858.366	1699.4	0.0459638	0.381723	0.299083	1.34831	0.445255	0.81065	1	0	0
172	634.286	1519.85	0.00964286	0.243587	0.161581	1.55394	0.736263	1.00092	1	0	0
173	730.343	1635.36	0.04153	0.192067	0.640058	1.66337	0.953789	0.250012	1	0	0
174	588.788	1627.94	0.0440429	0.0588709	0.0523863	1.78671	1.65637	1.38473	1	0	0
175	633.785	1516.82	0.00526508	0.204378	0.128376	1.69086	0.841885	1.09419	1	0	0
176	826.823	1586.5	0.0407596	0.150055	0.150739	2.34582	1.8583	1.12349	1	0	0
177	626.299	1552.52	0.0236928	0.196352	0.103203	1.05727	0.535805	0.676776	1	0	0
178	695.82	1590.73	0.0297771	0.118998	0.268635	1.06418	0.774116	0.444457	1	0	0
179	634.788	1519.08	0.00399286	0.270195	0.170246	1.58049	0.711341	0.959763	1	0	0
180	644.313	1522.5	0.0116248	0.194497	0.114127	1.01591	0.656973	0.469298	1	0	0
181	703.322	1515.31	0.0306969	0.21713	0.2644	1.59833	0.946528	0.585911	1	0	0
182	704.33	1519.97	0.0411354	0.152261	0.239606	1.08968	0.727633	0.373398	1	0	0
183	703.825	1517.31	0.0395816	0.25043	0.206653	1.51264	0.848391	0.60111	1	0	0
184	477.774	1440.77	0.02995	0.0623973	0.0542821	1.40231	1.14343	1.2062	1	0	0
185	478.267	1446.25	0.0438748	0.0528522	0.0685648	1.09683	0.925299	0.844944	1	0	0
186	596.785	1443.1	0.0435574	0.0791658	0.0698118	1.16637	1.10414	0.945158	1	0	0
187	546.754	1452.56	0.00910749	0.0525719	0.0486507	1.03238	0.628141	0.705184	1	0	0
188	473.245	1305.26	0.0265101	0.065501	0.101926	1.20908	0.575409	0.821769	1	0	0
189	677.835	1431.25	0.0247135	0.121094	0.464578	1.26687	0.670669	0.284054	1	0	0
190	598.276	1432.43	0.00862428	0.199923	0.0129984	1.20974	0.647941	0.794895	1	0	0
191	444.215	1362.68	0.011879	0.0397853	0.0236872	1.09375	0.884129	0.904042	1	0	0
192	472.742	1311.52	0.0299511	0.0363304	0.0997271	1.65051	0.913074	1.16372	1	0	0
193	473.744	1310.17	0.0183449	0.0349208	0.0564826	1.46876	0.81389	1.02135	1	0	0
194	713.347	1275.67	0.0410632	0.0318743	0.0393527	1.00491	0.696754	0.750551	1	0	0
195	671.316	1316.48	0.0366152	0.0994929	0.100033	1.21202	0.994552	0.787829	1	0	0
196	536.757	1176.73	0.00465469	0.0506799	0.00657779	1.18825	0.600817	0.794729	1	0	0
197	439.055	2049.08	0.0472871	0.573647	0.788878	-1.00974	0.253949	0.111158	1	0	0
198	587.819	1938.54	0.0476187	0.181987	0.811334	1.05686	1.18386	-0.0785148	1	0	0
199	870.859	1875.32	0.0128935	0.694472	0.321965	1.96627	0.288635	-0.617139	1	0	0
200	765.869	1708.58	0.0374809	0.309057	0.553687	1.0045	1.335	0.218633	1	0	0
201	525.251	1500.22	0.044915	0.448318	0.054948	-1.0531	-0.395967	-1.03852	1	0	0
202	495.257	1469.57	0.0483251	0.519229	0.186428	-1.21079	-0.381991	-0.696026	1	0	0
203	518.265	1412.71	0.0373559	0.379531	0.148258	-1.4053	-0.603487	-0.875583	1	0	0
204	445.138	1404.37	0.0433609	0.846089	0.414027	-1.2136	-0.106028	-0.39002	1	0	0
205	614.312	1363.81	0.0378422	0.113035	0.194842	-2.65717	-1.67596	-1.27848	1	0	0
206	689.844	1221.72	0.0405712	0.212447	0.15913	1.4197	0.671056	1.05194	1	0	0
207	575.28	1211.98	0.0249248	0.0839047	0.39497	1.74891	1.24014	0.587175	1	0	0
208	469.214	1210.88	0.0327208	0.0825099	0.184966	1.78337	1.23146	0.974749	1	0	0
209	575.772	1188.37	0.0209102	0.268603	0.0731578	1.51265	0.91982	1.44889	1	0	0
210	460.234	1122.49	0.0303702	0.0607883	0.386753	-1.16607	-0.93008	-0.477161	1	0	0
211	620.303	874.691	0.0363953	0.26023	0.0578726	1.32503	1.18942	2.16631	1	0	0
212	727.827	2889.03	0.068738	0.0154298	0.0315262	0.794029	1.537	1.17411	0	1	1
213	935.381	1847.44	0.0857718	0.00289471	0.0191168	1.36389	2.37966	1.65827	0	1	1
214	608.337	1585.42	0.105401	0.00168211	0.0406135	0.948085	2.12668	1.76189	0	1	1
215	520.298	1424.64	0.596023	0.0112594	0.0117917	0.294092	1.73444	1.21874	0	1	1
216	578.069	2681.41	0.0515617	0.00921412	0.0352809	1.21649	1.92856	1.41412	0	1	1
217	597.089	2680.82	0.0698796	0.0125088	0.0433014	1.37356	2.12657	1.38582	0	1	1
218	902.429	1358.77	0.0378972	0.00226141	0.00874958	0.848352	1.54303	1.20728	0	1	1
219	421.136	2540.23	0.0472922	0.0024487	0.00770945	0.893057	1.38344	1.12354	0	1	1
220	540.158	2192.41	0.0173158	0.00169574	0.0224227	0.853578	1.11974	1.01746	0	1	1
221	1050.35	1652.16	0.177832	0.0252937	0.0174619	0.971568	1.75157	1.59084	0	1	1
222	401.092	3166.05	0.126178	0.0274558	0.0474838	0.939252	1.79604	1.31803	0	1	1
223	743.41	2848.21	0.169757	0.0323455	0.0128337	1.2079	2.70453	1.83103	0	1	1
224	744.614	2846.68	0.0772204	0.0304561	0.0163738	1.03362	2.12132	1.33152	0	1	1
225	475.051	2410.99	0.630228	0.0215255	0.0410041	0.170272	1.50441	1.0141	0	1	1
226	720.24	2209.9	0.0493127	0.0144524	0.0346483	0.851856	1.99219	1.11209	0	1	1
227	400.021	2877.84	0.233876	0.00445947	0.0129688	0.366982	1.25125	1.11801	0	1	1
228	474.06	2573.8	0.292929	0.0470499	0.0383989	0.436311	1.5665	1.56657	0	1	1
229	400.014	2466.77	0.140265	0.0148028	0.0467686	0.517349	1.42743	1.23815	0	1	1
230	441.06	2302.03	0.443084	0.0172077	0.0307893	0.295141	1.75817	1.45651	0	1	1
231	902.427	1343.96	0.0666581	0.00387791	0.0160302	1.03834	1.27746	1.27233	0	1	1
232	415.038	3461.55	0.227302	0.00117571	0.0393266	0.404481	1.42455	1.00295	0	1	1
233	418.206	2677.67	0.105126	0.0204921	0.0392075	1.13371	2.37131	1.70671	0	1	1
234	440.058	2300.64	0.420748	0.0398607	0.0471224	0.337787	1.35901	1.1199	0	1	1
235	1121.86	1763.67	0.0933725	0.0363121	0.0434653	1.75796	2.41518	1.56417	0	1	1
236	1087.54	1709.78	0.123675	0.0308045	0.0346455	1.51726	2.31467	1.39902	0	1	1
237	1013.11	1880.64	0.133735	0.0144304	0.0216235	1.10714	1.59487	1.42207	0	1	1
238	409.182	2155.01	0.0537821	0.00267978	0.0125003	0.940104	1.62615	1.04422	0	1	1
239	569.04	2144	0.0933669	0.00289458	0.00763739	0.875256	1.33041	1.20034	0	1	1
240	534.251	1716.27	0.44395	0.00992438	0.0239303	0.378262	1.23562	1.13969	0	1	1
241	531.259	1699.26	0.290967	0.00275201	0.0340324	0.507828	1.0928	1.24131	0	1	1
242	696.383	1709.85	0.170454	0.00341932	0.0127725	0.803881	1.78383	1.68697	0	1	1
243	526.695	1659.24	0.0329487	0.00360313	0.00176493	0.983261	1.38297	1.67029	0	1	1
244	652.347	1648.64	0.0642438	0.021197	0.0131197	1.06471	1.86662	1.69032	0	1	1
245	755.409	1361.83	0.111417	0.0187236	0.012246	0.592059	1.09733	1.12136	0	1	1
246	472.063	3152.33	0.397025	0.0251013	0.0410349	0.356939	1.20275	1.05108	0	1	1
247	442.022	2968.61	0.0719085	0.013694	0.0419522	0.641767	1.32079	1.0111	0	1	1
248	403.021	2874.64	0.517356	0.0032031	0.0322492	0.198738	1.18155	1.00828	0	1	1
249	476.062	2562.48	0.396647	0.0149487	0.0412054	0.319214	1.63029	1.25824	0	1	1
250	401.024	2469.34	0.0773283	0.0211385	0.0314514	0.76834	1.70655	1.45577	0	1	1
251	672.24	2381.21	0.135541	0.00546246	0.0177088	1.24913	2.24113	1.73035	0	1	1
252	581.075	2363.62	0.101302	0.00747292	0.0177769	1.34344	2.00302	1.5243	0	1	1
253	583.055	2370.87	0.129672	0.0303931	0.0292983	1.02443	1.56967	1.15274	0	1	1
254	563.053	2368.28	0.128439	0.00906985	0.0174118	0.747153	1.44035	1.00173	0	1	1
255	385.137	2304.06	0.106284	0.00775101	0.03135	0.746098	1.34367	1.11492	0	1	1
256	798.496	2280.28	0.105546	0.0174779	0.0265906	1.60105	2.00914	1.84987	0	1	1
257	778.841	2221.54	0.137201	0.0224934	0.0402172	1.39839	1.7101	1.60069	0	1	1
258	796.378	2151.28	0.109406	0.02982	0.047841	0.949188	2.23217	1.07991	0	1	1
259	808.418	2216.19	0.135447	0.0263919	0.0307621	1.08571	1.7744	1.17497	0	1	1
260	576.022	2192.91	0.00333729	0.000144761	0.00958582	0.675145	1.16032	1.00651	0	1	1
261	1018.27	2154.58	0.104688	0.0198564	0.0272409	1.45171	1.96364	1.65996	0	1	1
262	462.198	2161.62	0.0607791	0.0122551	0.0234287	1.16241	1.49618	1.24126	0	1	1
263	567.03	2147.16	0.0513969	0.00904178	0.0214935	1.3599	1.91394	1.3966	0	1	1
264	1020.32	2158.99	0.0747228	0.00849187	0.0117709	1.23253	1.76125	1.50933	0	1	1
265	1000.31	2153.13	0.165262	0.0250403	0.035066	0.992392	1.51258	1.35209	0	1	1
266	1085.98	1712.39	0.0908383	0.0255896	0.030207	1.9758	2.75123	1.82569	0	1	1
267	554.159	1978.62	0.279823	0.00750469	0.0220193	0.298731	1.3445	1.02322	0	1	1
268	802.394	1893.73	0.52452	0.045665	0.0292796	0.319512	1.01469	1.06991	0	1	1
269	897.496	1849.8	0.0869144	0.0265134	0.0113046	1.4425	2.68678	2.28487	0	1	1
270	775.287	1861.79	0.10154	0.015478	0.0301141	0.86091	1.27531	1.19764	0	1	1
271	898.468	1850.58	0.141275	0.0385397	0.00886027	0.891701	1.76419	1.63212	0	1	1
272	934.44	1836	0.346628	0.0130592	0.0447856	0.808124	2.0252	1.58081	0	1	1
273	1023.44	1793.3	0.0739097	0.00504976	0.00200229	0.982651	1.49611	1.52878	0	1	1
274	1024.4	1790.13	0.153471	0.0135988	0.00338986	0.712395	1.21911	1.2186	0	1	1
275	686.86	1784.7	0.0556933	0.0494487	0.0412202	1.91928	1.75515	1.64377	0	1	1
276	928.538	1785	0.0505564	0.028495	0.0193382	1.34932	1.32536	1.51387	0	1	1
277	689.325	1683.22	0.108374	0.00423411	0.0195965	1.16914	2.08093	1.65523	0	1	1
278	997.431	1657.87	0.0536153	0.0024859	0.00615468	1.35302	2.20179	1.95675	0	1	1
279	690.334	1678.7	0.099879	0.00205614	0.00270327	0.947441	1.90706	1.70061	0	1	1
280	1033.48	1720.64	0.0748013	0.00854249	0.023799	1.50353	1.95068	1.75069	0	1	1
281	679.338	1702.09	0.254805	0.0162678	0.0212258	0.451032	1.28987	1.05568	0	1	1
282	1034.44	1723.16	0.0974466	0.00833483	0.0235837	1.46156	1.93929	1.74806	0	1	1
283	1035.5	1724.92	0.110085	0.0125285	0.0449752	1.00631	1.38546	1.13636	0	1	1
284	999.437	1657.53	0.0550036	0.00299659	0.0386955	1.33208	2.0747	1.52768	0	1	1
285	714.315	1600.48	0.0752592	0.00397158	0.0121479	1.34173	2.30672	1.99577	0	1	1
286	823.379	1681.88	0.0277586	0.00708408	0.00288696	0.72938	1.00588	1.02835	0	1	1
287	549.288	1699	0.101585	0.00828315	0.00240209	0.49133	1.01634	1.10774	0	1	1
288	551.199	1657.04	0.00336452	0.0035275	0.0100245	0.9583	1.09206	1.10057	0	1	1
289	866.356	1659.9	0.0197256	0.0117056	0.0082239	0.983616	1.34584	1.23099	0	1	1
290	600.292	1657.93	0.0841135	0.041884	0.0299162	1.63442	1.38741	1.16835	0	1	1
291	526.2	1659.56	0.0365885	0.00240561	0.00935916	0.806453	1.43195	1.56577	0	1	1
292	961.447	1626.62	0.0990041	0.0462274	0.0211711	1.15978	1.17693	1.15462	0	1	1
293	853.36	1589.26	0.0647675	0.00936613	0.0166492	1.31744	1.58429	1.51899	0	1	1
294	822.338	1367.42	0.0953599	0.00376424	0.024497	0.912953	1.63322	1.13664	0	1	1
295	475.053	2559.6	0.104129	0.00623058	0.0427166	0.677705	1.96763	1.56608	0	1	1
296	439.053	2312.73	0.113219	0.0279567	0.0199872	0.595676	2.01248	1.72105	0	1	1
297	407.118	2330.15	0.0817128	0.0276344	0.00887889	0.708108	1.41339	1.41593	0	1	1
298	438.065	2325.35	0.526359	0.043492	0.0472074	0.286447	1.61431	1.60528	0	1	1
299	407.117	2301.15	0.0751999	0.0384157	0.0412465	0.844241	1.19302	1.15954	0	1	1
300	472.261	1866.14	0.0522958	0.0434679	0.0244096	0.736075	1.65558	1.06774	0	1	1
301	1025.44	1747.1	0.074322	0.0152643	0.000898614	0.984564	1.2235	1.41361	0	1	1
302	665.29	1684.28	0.321951	0.00727306	0.0458227	0.690881	1.70608	1.2689	0	1	1
303	569.239	1653.71	0.00730597	0.000665802	0.013478	0.930347	1.14483	1.11545	0	1	1
304	561.274	1651	0.281964	0.0338039	0.0179205	0.680865	1.20487	1.51914	0	1	1
305	504.268	1611.88	0.0551642	0.0238751	0.0249751	0.91371	1.68252	1.52339	0	1	1
306	534.272	1475.32	0.0457676	0.00142232	0.00603081	0.694947	1.45541	1.24913	0	1	1
307	564.31	1495.89	0.085893	0.0216298	0.022983	0.851573	2.28644	1.96427	0	1	1
308	745.845	1931.99	0.0793279	0.0488514	0.295126	0.675502	1.45714	0.457348	0	1	0
309	553.276	1916.83	0.148371	0.0199737	0.0890733	0.699046	1.29317	0.863466	0	1	0
310	686.824	1950.85	0.0401228	0.0310354	0.0324315	0.63782	1.03573	0.274338	0	1	0
311	690.346	1155.95	0.262549	0.00363044	0.109504	0.435018	1.3521	0.813147	0	1	0
312	387.019	3500.11	0.219022	0.00149394	0.135281	0.294083	1.36383	0.532774	0	1	0
313	387.028	3487.53	0.00921749	0.00168485	0.0246319	0.605367	1.10415	0.782947	0	1	0
314	395.093	3099.92	0.162089	0.0156175	0.0125806	0.482632	1.44986	0.878092	0	1	0
315	648.911	2679.15	0.0665248	0.00725784	0.0554915	0.766899	1.93625	1.22652	0	1	0
316	472.261	2048.36	0.926238	0.0383925	0.159404	0.0221438	1.09203	0.380131	0	1	0
317	570.28	1812.07	0.12602	0.0390377	0.99237	0.776965	1.00512	-0.00428054	0	1	0
318	1085.44	1781.76	0.0619998	0.00743689	0.0633835	1.02216	1.22878	0.771435	0	1	0
319	565.316	1515.53	0.0334296	0.0405416	0.0356846	0.655359	1.33502	0.700181	0	1	0
320	787.371	1384.15	0.0418149	0.00487348	0.00453301	0.542988	1.05323	0.907726	0	1	0
321	688.354	1154.33	0.159914	0.00512837	0.0514796	0.844674	1.93199	1.35878	0	1	0
322	385.113	3472.37	0.046713	0.00689479	0.0264678	0.623191	1.29192	0.859229	0	1	0
323	746.081	2974.54	0.0811369	0.0478957	0.144496	0.811707	1.43761	1.04993	0	1	0
324	577.076	2684.86	0.0817509	0.013404	0.0597232	1.17417	1.99961	1.10108	0	1	0
325	592.316	1791.47	0.17108	0.00928152	0.0291709	0.777146	1.54882	0.846674	0	1	0
326	504.27	1423.13	0.400923	0.00131654	0.0321383	0.261394	1.16302	0.6934	0	1	0
327	403.011	3214.97	0.616606	0.00879306	0.0385952	0.148082	1.12201	0.883159	0	1	0
328	621.801	1490.24	0.631302	0.0170879	0.536988	-0.228218	-1.04624	-0.265929	0	1	0
329	713.363	1199.88	0.714464	0.0408725	0.71568	-0.220789	-1.38301	-0.260515	0	1	0
330	469.222	1151.49	0.667237	0.0345612	0.92736	0.31179	-1.46855	0.0825662	0	1	0
331	441.236	1091.16	0.996309	0.0425614	0.598305	0.00306145	-1.25491	-0.298142	0	1	0
332	668.326	1039.59	0.547643	0.0382515	0.208659	-0.263212	-1.01602	-0.633239	0	1	0
333	401.029	3202.19	0.769444	0.00464457	0.130434	0.112919	1.16403	0.548972	0	1	0
334	595.087	2673.96	0.11775	0.0123166	0.0570684	1.52044	2.42732	1.59653	0	1	0
335	596.085	2677.7	0.121861	0.0188515	0.0929604	1.0973	1.7332	1.14577	0	1	0
336	531.261	1712.14	0.46992	0.000745692	0.0564738	0.219069	1.17151	1.01154	0	1	0
337	525.676	1678.62	0.129964	0.00709075	0.0677441	0.652409	1.26605	1.07844	0	1	0
338	757.408	1468.65	0.133074	0.0250986	0.311861	-0.912735	-1.61282	-0.592554	0	1	0
339	521.289	1428.92	0.198184	0.0129978	0.157195	0.532015	1.42337	0.53145	0	1	0
340	589.298	1126.46	0.185111	0.0238425	0.370872	-0.846304	-1.83671	-0.640534	0	1	0
341	441.741	1099.47	0.986006	0.0363491	0.509351	-0.010711	-1.08583	-0.322831	0	1	0
342	384.066	3515.78	0.927954	0.0202284	0.151326	-0.0275374	1.05224	0.745558	0	1	0
343	385.112	3479.97	0.0617063	0.00718144	0.0838639	0.579771	1.11193	0.799778	0	1	0
344	415.904	3464.25	0.329292	0.00175967	0.0512354	0.226731	1.09711	0.687831	0	1	0
345	417.029	3463.56	0.477708	0.0031121	0.0589012	0.187708	1.02342	0.914876	0	1	0
346	384.029	3347.63	0.256798	0.0050742	0.0870268	0.313595	1.05288	0.586762	0	1	0
347	489.253	3272.75	0.16924	0.0332547	0.205094	1.00027	1.24991	0.85913	0	1	0
348	419.128	3183.2	0.184913	0.0248857	0.238349	0.491302	1.34524	0.595883	0	1	0
349	441.121	3170.23	0.0837766	0.0233875	0.0870851	1.46725	2.3675	1.54501	0	1	0
350	500.074	3157.16	0.296785	0.0066245	0.0720683	0.45721	1.45001	1.11201	0	1	0
351	413.298	2756.2	0.280813	0.027441	0.431667	0.577977	1.01352	0.386668	0	1	0
352	414.302	2756.98	0.298366	0.0382899	0.560558	0.640797	1.04264	0.293983	0	1	0
353	586.275	3039.22	0.0858622	0.0253792	0.141679	1.1439	1.13843	0.86279	0	1	0
354	383.151	3020.59	0.458581	0.0101701	0.0637314	0.249293	1.14591	0.813933	0	1	0
355	445.282	2923.97	0.199711	0.0453084	0.601802	0.559603	1.12158	0.24169	0	1	0
356	432.308	2890.46	0.0967118	0.02165	0.0549968	2.07397	2.44668	1.48154	0	1	0
357	433.299	2884.14	0.15629	0.0399467	0.147308	0.930454	1.17593	0.485887	0	1	0
358	399.028	2857.28	0.955845	0.0135769	0.0782145	0.0155266	1.02369	0.570841	0	1	0
359	463.281	2821.06	0.339344	0.0378953	0.167003	0.419132	1.1409	0.397796	0	1	0
360	571.3	2784.71	0.205386	0.0435244	0.313816	0.640224	1.35274	0.459818	0	1	0
361	399.014	2770.7	0.274138	0.0389755	0.309548	-0.281875	1.09935	0.254032	0	1	0
362	471.289	2451.79	0.2616	0.0206106	0.0975838	0.724083	1.54054	1.01854	0	1	0
363	472.281	2461.86	0.514789	0.00545159	0.119027	0.277219	1.09043	0.644755	0	1	0
364	585.275	2427.12	0.096203	0.0372093	0.101065	0.784279	1.45385	0.625229	0	1	0
365	861.167	1911.43	0.110294	0.0279453	0.0591703	1.07444	2.19831	1.44792	0	1	0
366	774.326	2395.54	0.0943091	0.0121398	0.0517747	1.10761	2.16094	1.32649	0	1	0
367	477.048	2401.45	0.70877	0.0167113	0.0521406	-0.116382	1.25115	0.885834	0	1	0
368	544.303	2375.8	0.118647	0.0177898	0.0621832	0.56021	1.34931	0.618153	0	1	0
369	775.449	2384.81	0.122208	0.0259321	0.0723655	0.649229	1.15275	0.64565	0	1	0
370	686.393	2360.86	0.0887696	0.0272396	0.0252587	0.721599	1.92609	0.889903	0	1	0
371	742.301	2326.74	0.033037	0.0114393	0.00477279	0.777671	1.26948	0.818275	0	1	0
372	818.9	2212.82	0.0637968	0.0210136	0.0194828	0.62191	1.71597	0.77737	0	1	0
373	809.506	2225.77	0.0969536	0.0163656	0.0306943	0.758477	1.49469	0.823561	0	1	0
374	674.316	2201.57	0.124395	0.0200277	0.046514	0.609021	1.1008	0.816934	0	1	0
375	860.734	2139.58	0.0578673	0.0151553	0.118001	0.832783	1.76152	0.806542	0	1	0
376	722.331	2196.2	0.177692	0.0311688	0.147064	0.686474	1.04581	0.689163	0	1	0
377	792.272	2172.56	0.0592988	0.00580778	0.00753536	0.682358	1.15004	0.819991	0	1	0
378	772.335	2145.91	0.0447504	0.00567831	0.0596806	0.957601	1.15129	0.740962	0	1	0
379	520.187	2033.02	0.147612	0.0404186	0.700042	1.38901	1.61832	0.308351	0	1	0
380	739.424	1994.29	0.490472	0.0458452	0.272786	0.255288	1.15883	0.359902	0	1	0
381	877.35	1982.26	0.0574794	0.046261	0.33143	1.71484	2.06875	0.822016	0	1	0
382	629.803	1945	0.138651	0.0198722	0.365421	0.830986	1.13787	0.289483	0	1	0
383	936.42	1857.61	0.0799143	0.01205	0.114673	0.608209	1.52929	0.634697	0	1	0
384	600.802	1658.62	0.131474	0.0415076	0.112094	1.71427	1.42568	1.04054	0	1	0
385	831.385	1674.35	0.106619	0.0267635	0.312168	0.995658	1.12634	0.718046	0	1	0
386	674.312	1704.2	0.0771712	0.0187938	0.049589	0.643013	1.02788	0.47428	0	1	0
387	813.4	1649.3	0.0501908	0.004326	0.048338	0.459148	1.05431	0.576911	0	1	0
388	550.785	1632.37	0.0780717	0.00360365	0.0364479	0.739973	1.27957	0.896765	0	1	0
389	912.435	1583.84	0.157942	0.0434848	0.181418	0.442645	1.29848	0.354491	0	1	0
390	685.823	913.347	0.119391	0.0195827	0.133298	1.81361	1.16039	1.01928	0	1	0
391	384.988	3506.71	0.652933	0.0122822	0.173148	0.175844	1.26312	0.855196	0	1	0
392	400.018	3251.11	0.26022	0.00605341	0.0733944	0.341812	1.1505	0.843496	0	1	0
393	402.02	2972.95	0.227996	0.0336799	0.203291	0.388711	1.00062	0.580785	0	1	0
394	474.054	2520.33	0.197167	0.0202805	0.181446	0.508177	1.1412	0.494494	0	1	0
395	401.023	2492.26	0.0867348	0.0320826	0.0533829	0.555102	1.65626	1.49385	0	1	0
396	478.201	2463.59	0.170459	0.00463527	0.0533808	0.409058	1.32553	0.857735	0	1	0
397	401.026	2447.18	0.328011	0.0346012	0.0700918	0.381573	1.17691	0.931019	0	1	0
398	402.168	2285.58	0.148221	0.0305164	0.116277	0.905437	1.01044	0.973935	0	1	0
399	545.113	2178.95	0.0136952	0.00224339	0.0275893	0.585476	1.0077	0.96745	0	1	0
400	430.249	1660.02	0.132065	0.00816776	0.0141345	0.468563	1.04898	0.831562	0	1	0
401	788.397	1344.6	0.00612073	0.0213555	0.0207388	0.77363	1.03489	0.892554	0	1	0
402	476.269	1329.47	0.504747	0.0188467	0.17509	0.376964	1.45105	0.928622	0	1	0
403	457.052	3569.7	0.76867	0.0400034	0.19162	0.110988	1.0338	0.433688	0	1	0
404	383.02	3504.65	0.397723	0.00107673	0.314108	0.400214	1.62025	0.617351	0	1	0
405	385.024	3482.21	0.0970052	0.00482162	0.0696839	0.547167	1.33472	0.75569	0	1	0
406	427.99	3492.96	0.282315	0.00157871	0.422622	0.358102	1.15718	0.319153	0	1	0
407	382.023	3494.79	0.235719	0.00209262	0.180296	0.352834	1.31603	0.43068	0	1	0
408	384	3486.12	0.147632	0.00230989	0.238108	0.425832	1.15514	0.448219	0	1	0
409	382.02	3492	0.112407	0.000351475	0.0672519	0.463861	1.40647	0.578955	0	1	0
410	415.034	3445.82	0.779379	0.0281639	0.104705	0.107852	1.05644	0.628682	0	1	0
411	387.041	3346.96	0.946575	0.0145754	0.300583	0.0221298	1.01695	0.387858	0	1	0
412	385.032	3342.66	0.304207	0.0105554	0.209436	0.418466	1.20643	0.629912	0	1	0
413	473.043	3334.9	0.382417	0.0185314	0.0678125	0.329329	1.42911	1.03939	0	1	0
414	401.027	3182.73	0.933181	0.0169451	0.467395	0.039397	1.13443	0.368797	0	1	0
415	403.027	3176.64	0.647398	0.022568	0.22656	-0.17632	1.01351	0.511	0	1	0
416	401.019	2941.09	0.073863	0.00198717	0.0727593	0.465945	1.06325	0.485931	0	1	0
417	418.023	2955.53	0.224536	0.0156158	0.126147	0.472949	1.20386	0.609587	0	1	0
418	442.021	2942.05	0.012651	0.00218726	0.0326481	0.611158	1.02395	0.485238	0	1	0
419	747.087	2920.2	0.060493	0.0357322	0.0243538	0.745324	1.27499	0.89776	0	1	0
420	418.024	2942.27	0.0214551	0.000745905	0.00235625	0.775046	1.17064	0.991931	0	1	0
421	405.012	2851.03	0.5183	0.00659789	0.0960976	0.21941	1.04542	0.710049	0	1	0
422	439.063	2677.62	0.265485	0.0110049	0.0577636	0.373772	1.34201	0.892247	0	1	0
423	475.055	2583.19	0.41294	0.0137379	0.0553552	0.408925	1.72754	1.52172	0	1	0
424	477.056	2526.64	0.23403	0.0302241	0.22002	0.522426	1.11057	0.603061	0	1	0
425	476.041	2533.09	0.479149	0.0161097	0.0727893	0.266891	1.22053	0.796374	0	1	0
426	422.135	2528.11	0.185529	0.00226934	0.0277182	0.417015	1.09409	0.733658	0	1	0
427	439.058	2518.29	0.381044	0.023477	0.158913	0.386919	1.36639	0.739439	0	1	0
428	438.074	2517.21	0.186968	0.0133513	0.0310262	0.542502	1.21492	0.857075	0	1	0
429	471.277	2470.93	0.336086	0.022249	0.307508	0.71008	1.48436	0.509765	0	1	0
430	475.054	2400.57	0.953637	0.0195329	0.174398	-0.0249092	1.35887	0.712029	0	1	0
431	474.038	2399	0.763355	0.0182322	0.0750151	0.106512	1.16404	0.856558	0	1	0
432	476.044	2391.48	0.97717	0.038787	0.163189	0.0115185	1.06669	0.570854	0	1	0
433	633.929	2361.72	0.291445	0.0251174	0.035362	0.421932	1.00448	0.743557	0	1	0
434	741.379	2315.33	0.268151	0.0482818	0.105232	0.625346	1.27211	0.736934	0	1	0
435	739.319	2248.8	0.849075	0.0404374	0.0617146	0.118913	1.39125	0.799217	0	1	0
436	956.295	2153.37	0.518597	0.038712	0.0210644	0.322106	1.53685	0.64486	0	1	0
437	675.239	2157.72	0.0704141	0.0339045	0.273627	1.57626	1.73314	1.13719	0	1	0
438	684.759	2154.65	0.0616876	0.0276749	0.161962	1.68378	2.38931	1.6063	0	1	0
439	675.727	2157.43	0.101274	0.0189661	0.167684	1.33244	1.66872	0.990215	0	1	0
440	905.359	2160.71	0.423178	0.0144304	0.0401589	0.355636	1.20646	0.766454	0	1	0
441	975.711	2098.83	0.243447	0.027577	0.076703	0.612304	1.15252	0.875628	0	1	0
442	674.787	2152.12	0.0726458	0.0311499	0.15175	1.84526	2.39384	1.66918	0	1	0
443	589	2146.72	0.217397	0.0285917	0.0533372	0.529894	1.09679	0.692667	0	1	0
444	980.883	2059.06	0.10018	0.0447703	0.212714	1.0137	1.18412	0.7215	0	1	0
445	746.357	1987.13	0.149394	0.0405417	0.273946	0.353421	1.00547	0.299768	0	1	0
446	790.332	2005.65	0.0944423	0.0227519	0.190653	1.06689	1.44663	0.804556	0	1	0
447	870.374	1857.33	0.0526919	0.0427801	0.286947	2.59096	3.03362	1.32647	0	1	0
448	656.315	1947.07	0.0421344	0.0132347	0.142286	0.806001	1.04035	0.42044	0	1	0
449	745.867	1911.02	0.0590775	0.04516	0.449492	0.772084	1.56046	0.324293	0	1	0
450	618.295	1914.18	0.211926	0.0236896	0.107509	0.376537	1.18889	1.10236	0	1	0
451	935.396	1831.59	0.337466	0.0311542	0.0750364	0.641825	1.43457	1.26554	0	1	0
452	714.319	1587.18	0.0734272	0.00405438	0.0608646	1.23917	1.85436	1.51756	0	1	0
453	569.209	1647.89	0.213811	0.0164046	0.0635325	0.526689	1.0714	0.962879	0	1	0
454	631.804	1665.53	0.0193901	0.0215126	0.102378	0.95002	1.21628	0.771957	0	1	0
455	591.306	1575.2	0.213052	0.00212181	0.0502119	0.592352	1.81208	1.42919	0	1	0
456	421.243	1591.92	0.142777	0.0293828	0.078401	0.677903	1.33142	1.2222	0	1	0
457	547.287	1499.63	0.242377	0.035189	0.0620737	0.458724	1.68784	1.44325	0	1	0
458	659.32	1428.02	0.227913	0.0023719	0.0157878	0.458782	1.11679	0.971107	0	1	0
459	564.312	1520.31	0.0825148	0.0464933	0.158842	1.01203	1.80151	1.01683	0	1	0
460	855.432	1343.09	0.110383	0.021132	0.0775932	1.06609	1.43446	1.19999	0	1	0
461	856.432	1341.95	0.294181	0.0433262	0.121058	0.558869	1.04112	0.875578	0	1	0
462	495.261	1181.48	0.0848622	0.0375059	0.149928	1.03273	1.23909	0.896225	0	1	0
463	689.35	1138.61	0.109628	0.0122606	0.0541089	1.01349	1.68227	1.38348	0	1	0
464	686.814	903.479	0.176434	0.0426014	0.0528414	1.414	1.19884	1.34341	0	1	0
465	908.47	861.138	0.410508	0.0264442	0.298647	0.513246	1.34381	0.667744	0	1	0
466	531.725	829.22	0.984919	0.0100299	0.647165	-0.0110875	1.4383	0.257264	0	1	0
467	425.159	3539.62	0.221232	0.00256822	0.028967	0.520892	1.42605	0.891409	0	1	0
468	415.028	3483.1	0.678087	0.00457159	0.031151	0.132433	1.39513	0.817871	0	1	0
469	402.161	3462.61	0.407455	0.0020918	0.0295177	0.206994	1.00098	0.717229	0	1	0
470	384.034	3362.58	0.379819	0.0150804	0.0640426	0.28449	1.2091	0.697099	0	1	0
471	401.03	3265.94	0.633162	0.0261936	0.140206	0.18739	1.24823	0.819392	0	1	0
472	402.028	3254.05	0.0744748	0.0053988	0.0598267	0.421306	1.26592	0.738428	0	1	0
473	400.02	3214.87	0.327409	0.0038277	0.0344137	0.30623	1.1429	0.733458	0	1	0
474	403.024	3228.74	0.0780819	0.00117862	0.0271325	0.463399	1.17925	0.900884	0	1	0
475	402.027	3242.54	0.18106	0.00631835	0.0684217	0.370529	1.06728	0.712232	0	1	0
476	402.024	3223.76	0.122801	0.00385516	0.029263	0.420328	1.07627	0.803589	0	1	0
477	400.018	3192.1	0.774951	0.00141202	0.16187	0.0984786	1.28615	0.492086	0	1	0
478	402.025	3210.61	0.182703	0.00221823	0.0127278	0.257824	1.09831	0.835882	0	1	0
479	387.035	3168.04	0.984283	0.0230054	0.226665	-0.00649578	1.06629	0.524961	0	1	0
480	402.038	3185.97	0.745109	0.000392695	0.053099	0.117203	1.11751	0.862446	0	1	0
481	402.096	3165.6	0.231322	0.011456	0.0673989	0.455935	1.31914	1.04124	0	1	0
482	395.097	3065.81	0.457015	0.0136186	0.0587268	0.370269	1.56704	1.34165	0	1	0
483	585.334	3053.2	0.0615321	0.0248336	0.0769813	2.01734	2.33988	1.57596	0	1	0
484	402.022	2864.32	0.964117	0.000957085	0.055561	-0.0152966	1.1257	0.75456	0	1	0
485	746.225	2906.97	0.818625	0.0351976	0.0640199	0.107566	1.23067	0.982998	0	1	0
486	405.016	2902.87	0.34834	0.012081	0.029388	0.234447	1.1102	0.870248	0	1	0
487	405.017	2874.79	0.51543	0.0135528	0.0277854	0.188817	1.00169	0.917277	0	1	0
488	400.022	2850.44	0.507562	0.00531409	0.0817244	0.277909	1.16595	0.759554	0	1	0
489	403.022	2841.39	0.368126	0.00595013	0.261902	0.384775	1.11033	0.610538	0	1	0
490	439.096	2714.59	0.419657	0.0127092	0.241056	-0.240126	1.02014	0.453829	0	1	0
491	647.966	2662.16	0.934694	0.027832	0.0666181	0.0391171	1.21804	0.971876	0	1	0
492	474.058	2594.4	0.327666	0.0451197	0.117386	0.47741	1.23837	0.881541	0	1	0
493	474.054	2555.64	0.121289	0.0115522	0.0538406	0.569813	1.69421	1.39716	0	1	0
494	477.063	2557.13	0.627246	0.0240486	0.06126	0.183756	1.55117	1.31126	0	1	0
495	439.061	2547.22	0.749891	0.0349735	0.0803386	-0.106249	1.60014	1.10453	0	1	0
496	438.085	2547.31	0.824387	0.0263513	0.0872371	0.0754071	1.25037	1.00273	0	1	0
497	475.052	2523.93	0.372102	0.0215419	0.32722	0.457427	1.33901	0.515135	0	1	0
498	400.016	2483.93	0.182785	0.0260957	0.0731615	0.503063	1.49983	1.09869	0	1	0
499	403.034	2478.63	0.880191	0.0413679	0.0343674	0.0377487	1.06901	0.993423	0	1	0
500	430.336	2468.8	0.0875433	0.0326233	0.228168	-0.941814	-1.19496	-0.606694	0	1	0
501	400.023	2448.01	0.321796	0.0151568	0.0630825	0.326232	1.16203	0.896958	0	1	0
502	476.058	2411.75	0.870796	0.0192438	0.0612227	-0.0365032	1.16077	1.01202	0	1	0
503	477.059	2414.6	0.657583	0.0211837	0.142374	-0.10828	1.15043	0.64441	0	1	0
504	400.02	2428.13	0.195806	0.013643	0.025375	0.503345	1.06487	0.863984	0	1	0
505	673.355	2383	0.131903	0.00541615	0.028553	0.771834	1.77135	0.941375	0	1	0
506	582.07	2358.7	0.184777	0.0132327	0.101871	0.688331	1.27672	0.780847	0	1	0
507	437.075	2310.89	0.413395	0.0461177	0.0368104	0.180446	1.10988	0.961036	0	1	0
508	614.319	2219.74	0.0815096	0.0299232	0.011288	0.557343	1.89788	0.868311	0	1	0
509	577.049	2219.2	0.00964546	0.0178427	0.00526107	0.668421	1.05446	0.923249	0	1	0
510	673.384	2189.01	0.224332	0.0193908	0.150129	0.785667	1.24318	0.745043	0	1	0
511	577.044	2193.29	0.099424	0.007805	0.0366284	0.552401	1.02047	0.789311	0	1	0
512	577.039	2187.29	0.0639513	0.00285663	0.0118663	0.514639	1.1323	0.955916	0	1	0
513	540.156	2168.11	0.0741244	0.00546634	0.0428884	0.69749	1.08828	0.942115	0	1	0
514	1018.89	2161.46	0.233771	0.0238207	0.0702804	0.91646	1.85557	1.32344	0	1	0
515	647.31	2156.39	0.0928249	0.0142981	0.088506	0.704035	1.08473	0.718471	0	1	0
516	605.305	2025.41	0.074142	0.00228979	0.139811	0.612749	1.14122	0.618186	0	1	0
517	791.318	1993.34	0.367715	0.00960515	0.00673142	0.297935	1.06911	0.969409	0	1	0
518	576.035	1964.32	0.0555099	0.0103785	0.0222915	0.737501	1.04944	0.956939	0	1	0
519	746.36	1923.32	0.0824217	0.0408643	0.284782	0.630591	1.14401	0.352921	0	1	0
520	553.27	1899.02	0.386998	0.0344418	0.0679219	0.365835	1.02393	1.12921	0	1	0
521	466.252	1902.99	0.351508	0.0371856	0.0602755	0.396814	1.34923	1.46773	0	1	0
522	872.398	1901.19	0.0205073	0.0349295	0.0936051	0.654368	1.51892	0.705624	0	1	0
523	896.46	1852.21	0.109763	0.0185388	0.0579718	1.52113	2.80863	1.98566	0	1	0
524	810.366	1823.02	0.136885	0.00419159	0.00973464	0.483138	1.01275	0.936153	0	1	0
525	686.363	1788.01	0.0681943	0.0345902	0.0683872	2.04737	1.75732	1.42549	0	1	0
526	665.289	1705.98	0.0877215	0.00164097	0.0856917	1.02675	2.09757	1.19189	0	1	0
527	998.437	1662.56	0.0924934	0.00240819	0.060639	1.29603	2.20549	1.3518	0	1	0
528	680.332	1707.23	0.132091	0.00797097	0.0155193	0.43746	1.27248	0.852169	0	1	0
529	691.335	1686.03	0.0411151	0.00707744	0.0448791	0.727603	1.26041	0.912979	0	1	0
530	449.253	1644.51	0.263052	0.00908069	0.090329	0.420058	1.09534	0.726984	0	1	0
531	606.766	1694.5	0.0650822	0.0155357	0.105169	1.05398	1.10009	0.850996	0	1	0
532	429.248	1666.98	0.305034	0.0078583	0.373358	0.477606	1.1427	0.425986	0	1	0
533	835.309	1619.68	0.0713643	0.0155602	0.287748	0.97095	1.42397	0.723249	0	1	0
534	548.288	1500.01	0.581175	0.0196072	0.203072	0.178874	1.08175	0.633282	0	1	0
535	628.301	1336.83	0.067933	0.00738061	0.0544038	0.807699	1.29618	0.949886	0	1	0
536	477.271	1441.73	0.0500882	0.0467808	0.143097	1.33401	1.24093	0.903244	0	1	0
537	740.344	1334.94	0.324662	0.0381352	0.0978146	0.391731	1.06308	0.747959	0	1	0
538	403.027	3307.23	0.676114	0.0261732	0.0651063	0.100431	1.16952	0.845788	0	1	0
539	401.022	3235.15	0.201772	0.00943125	0.084212	0.448846	1.13666	0.797707	0	1	0
540	400.02	3223.16	0.0113217	0.0024549	0.0209548	0.618742	1.22045	0.788488	0	1	0
541	401.021	2890.28	0.324627	0.0101539	0.0638581	0.242409	1.06714	0.620738	0	1	0
542	403.021	2972.51	0.105256	0.0404346	0.112713	0.546502	1.06419	0.833974	0	1	0
543	400.022	2949.65	0.0797038	0.0208049	0.0619199	0.599614	1.2584	0.72459	0	1	0
544	402.022	2952.39	0.141043	0.00382935	0.16071	0.412378	1.17853	0.359614	0	1	0
545	400.021	2898.5	0.267384	0.0202124	0.101618	0.313597	1.14179	0.722102	0	1	0
546	402.024	2891.14	0.747977	0.00551015	0.0886462	0.0841121	1.09678	0.636969	0	1	0
547	403.02	2903.93	0.49286	0.00872287	0.0368296	0.197747	1.13293	0.826568	0	1	0
548	431.308	2885.58	0.129926	0.0309145	0.103002	1.88	2.25394	1.26664	0	1	0
549	401.018	2861.92	0.799595	0.00192928	0.0573341	0.109723	1.22669	0.856772	0	1	0
550	421.135	2569.48	0.275399	0.0278961	0.0914807	0.594004	1.13228	0.958658	0	1	0
551	438.058	2305.94	0.437142	0.0428374	0.0552445	0.37416	1.40225	1.20007	0	1	0
552	577.046	1991.84	0.0878106	0.0307432	0.0399415	0.596349	1.16373	0.901714	0	1	0
553	836.352	1869.46	0.0436967	0.0426002	0.0759974	0.790812	1.04455	0.604672	0	1	0
554	636.34	1874.48	0.0239058	0.0260857	0.0540518	0.806679	1.25974	0.616697	0	1	0
555	592.315	1772.86	0.303611	0.0456259	0.0551942	0.526947	1.33775	1.01346	0	1	0
556	666.288	1710.5	0.15042	0.00241855	0.393497	0.524213	1.43587	0.399753	0	1	0
557	666.288	1687.75	0.755973	0.0107452	0.210437	0.129384	1.2353	0.64864	0	1	0
558	558.299	1665.57	0.125822	0.00896467	0.0886146	1.26066	1.26237	0.871356	0	1	0
559	598.306	1325.78	0.359214	0.00423133	0.114682	-0.298233	-1.07361	-0.619231	0	1	0
560	480.23	1248.72	0.207962	0.00326416	0.441068	-0.404223	-1.0424	-0.253062	0	1	0
561	441.737	1204.94	0.0666269	0.0236589	0.225856	-1.12776	-1.64387	-0.769885	0	1	0
562	586.306	1122.28	0.113385	0.036632	0.0510675	-0.84375	-1.32772	-1.27863	0	1	0
563	663.319	930.287	0.4481	0.0393284	0.496421	-0.477793	-1.63566	-0.414817	0	1	0
564	666.311	1607.88	0.0926942	0.632653	0.0407333	-0.712522	-0.250479	-1.01461	0	0	1
565	596.908	1504.69	0.127577	0.0792485	0.0323077	-0.931185	-1.35557	-1.87323	0	0	1
566	567.919	1436.35	0.106074	0.103931	0.0175618	0.870068	-0.67886	-1.00524	0	0	1
567	385.137	2260.92	0.119289	0.0169526	0.016933	0.843009	0.803796	1.09368	0	0	1
568	548.288	1716.18	0.878142	0.0288371	0.0147229	0.0518521	0.825963	1.11083	0	0	1
569	439.059	2335.56	0.346243	0.0908925	0.0494013	0.48008	1.77084	1.70766	0	0	1
570	510.732	1619.75	0.352608	0.456764	0.0230696	0.479592	0.2721	1.02137	0	0	1
571	545.096	2157.65	0.0192508	0.000385034	0.0180261	0.803523	0.95887	1.08637	0	0	1
572	385.139	2077.56	0.366348	0.30651	0.0239627	0.420011	0.370797	1.07332	0	0	1
573	910.526	2061.92	0.0901748	0.0545281	0.0136506	0.996773	2.32036	1.00404	0	0	1
574	716.184	1764.63	0.284437	0.112374	0.0342217	0.399823	1.69493	1.45553	0	0	1
575	618.788	842.335	0.0216176	0.0921806	0.0129571	0.750337	1.06695	1.02933	0	0	1
576	545.104	1945.24	0.119784	0.0868822	0.0233418	0.631227	0.56778	1.06304	0	0	1
577	526.201	1631.1	0.374081	0.462142	0.00370959	0.542363	0.357055	1.33627	0	0	1
578	526.706	1625.28	0.510018	0.668937	0.0237117	0.368014	0.15166	1.01949	0	0	1
579	854.329	1569.95	0.0777854	0.055294	0.0168273	1.05715	0.929308	1.25708	0	0	1
580	822.344	1332.75	0.317895	0.288596	0.0199639	0.798015	0.88601	1.33637	0	0	1
581	823.347	1329.56	0.465104	0.314761	0.042662	0.458853	0.650496	1.084	0	0	1
582	438.129	2525.28	0.297517	0.0285743	0.00580503	0.447325	0.704807	1.07149	0	0	1
583	685.423	2372.27	0.113067	0.0912068	0.0493062	0.850641	1.7788	1.22266	0	0	1
584	541.165	1932.93	0.204394	0.0128023	0.00787052	0.391503	0.57195	1.00091	0	0	1
585	545.105	1919.68	0.178422	0.121684	0.0448607	0.663577	0.533457	1.05152	0	0	1
586	1128.26	1728.58	0.289485	0.0858373	0.0226434	0.750282	1.59921	1.28898	0	0	1
587	542.753	1899.54	0.170682	0.1681	0.0300429	0.533594	0.663622	1.03008	0	0	1
588	689.33	1648.28	0.453729	0.716237	0.0111303	0.68242	0.379361	1.87196	0	0	1
589	896.462	1833.78	0.100535	0.061655	0.0307371	1.21631	1.72731	1.60192	0	0	1
590	897.493	1827.24	0.207796	0.170696	0.0170337	0.780585	0.811921	1.52097	0	0	1
591	898.471	1829.47	0.120266	0.0527752	0.026841	0.704854	0.687308	1.20976	0	0	1
592	1023.44	1771.16	0.2048	0.0836927	0.0158166	0.824221	0.956368	1.30526	0	0	1
593	997.473	1634.67	0.372614	0.557234	0.0352937	0.675223	0.382671	1.2545	0	0	1
594	690.329	1653.4	0.157696	0.199871	0.0135107	0.85704	0.814256	1.53326	0	0	1
595	679.336	1674.02	0.352389	0.0662222	0.0233642	0.507541	0.958622	1.26443	0	0	1
596	562.277	1652.91	0.698844	0.0566606	0.0183736	0.188142	1.0011	1.27087	0	0	1
597	548.282	1697.03	0.249032	0.0762723	0.0161777	0.703896	1.6413	1.77726	0	0	1
598	1027.43	1730.35	0.0439418	0.040357	0.000678259	0.805556	0.780365	1.08787	0	0	1
599	680.334	1674.73	0.234634	0.0580701	0.0192893	0.576875	0.75871	1.08999	0	0	1
600	999.444	1630.86	0.352816	0.59558	0.0118336	0.786392	0.386181	1.58062	0	0	1
601	823.376	1656.28	0.253169	0.103318	0.00642084	0.520428	0.660281	1.0176	0	0	1
602	510.217	1655.08	0.145114	0.112909	0.0172604	0.51698	0.806525	1.16399	0	0	1
603	824.374	1676.73	0.00893076	0.00194279	8.01125e-05	0.712726	0.936983	1.01057	0	0	1
604	1000.44	1637.15	0.375172	0.126137	0.0406673	0.597241	0.846392	1.08238	0	0	1
605	557.805	1649.7	0.161555	0.145595	0.0201881	1.40123	0.815924	1.45302	0	0	1
606	510.709	1651.16	0.122754	0.0665886	0.0105072	0.684867	0.881749	1.36913	0	0	1
607	1054.42	1652.4	0.309465	0.0131604	0.00159311	0.432979	0.971016	1.31462	0	0	1
608	910.423	1661.54	0.0708768	0.000773234	0.00348065	0.476932	0.995865	1.11071	0	0	1
609	499.724	1650.07	0.300935	0.121068	0.00836519	0.397008	0.56963	1.01643	0	0	1
610	728.39	1433.59	0.0805237	0.0450917	0.0401434	0.945072	0.90531	1.00059	0	0	1
611	935.386	1465.77	0.176825	0.172606	0.0315531	0.732751	0.657382	1.17006	0	0	1
612	871.444	1465.14	0.125601	0.0825095	0.0342589	0.819203	0.865834	1.25722	0	0	1
613	953.546	1436.3	0.200272	0.0378194	0.0234664	0.599783	0.956622	1.11898	0	0	1
614	435.242	1182.1	0.0688845	0.144948	0.0277938	0.90534	0.77472	1.08965	0	0	1
615	425.735	1181.35	0.0454294	0.136412	0.0377545	0.951773	0.731122	1.03323	0	0	1
616	788.413	1165.55	0.0301246	0.172277	0.00903562	0.855229	0.644076	1.14044	0	0	1
617	870.483	1002.55	0.12715	0.206246	0.0322453	0.65212	0.579296	1.15842	0	0	1
618	624.775	891.025	0.340231	0.64384	0.0396314	0.714829	0.309327	1.53725	0	0	1
619	614.754	877.595	0.33075	0.904689	0.0448326	0.806595	0.0948808	1.71031	0	0	1
620	545.741	840.712	0.0101113	0.0194456	0.00298083	0.853627	0.982298	1.01839	0	0	1
621	681.789	833.963	0.111448	0.327946	0.0472392	0.772985	0.551153	1.12418	0	0	1
622	680.872	823.29	0.10707	0.519838	0.0228678	1.15312	0.517901	1.57834	0	0	1
623	454.824	827.706	0.0800608	0.0905806	0.0346374	1.36407	0.959518	1.44738	0	0	1
624	448.817	822.842	0.07741	0.180847	0.0344423	1.16061	0.739526	1.15545	0	0	1
625	418.021	2873.64	0.557665	0.0267777	0.0400333	0.214492	0.880673	1.00001	0	0	1
626	455.098	2204.62	0.90464	0.701653	0.0485051	-0.025107	0.0730675	1.01273	0	0	1
627	576.031	2168.31	0.0116667	0.000429599	0.00403538	0.834387	0.988313	1.02304	0	0	1
628	690.365	2162.12	0.109401	0.0668601	0.0103407	0.893802	1.5899	1.06109	0	0	1
629	577.044	2151.8	0.135866	0.010481	0.0134479	0.596108	0.971265	1.11499	0	0	1
630	647.261	2134.14	0.296001	0.0102483	0.0171775	0.45888	0.969433	1.03648	0	0	1
631	540.156	2130.75	0.110243	0.0100085	0.0372212	0.651318	0.912151	1.06906	0	0	1
632	402.165	2096.47	0.254645	0.0468607	0.0442941	0.596363	0.721779	1.0882	0	0	1
633	790.33	1989.22	0.313376	0.0534476	0.0113864	0.474596	1.13567	1.18391	0	0	1
634	540.145	1964.63	0.0456958	0.0016321	0.0199822	0.906794	0.996864	1.11469	0	0	1
635	436.038	1871.9	0.887872	0.0935823	0.0443118	0.0502635	0.985615	1.0072	0	0	1
636	540.153	1910.86	0.172887	0.0738709	0.0337998	0.743073	0.724054	1.2085	0	0	1
637	636.336	1841.9	0.11768	0.1847	0.0311228	0.557093	0.755887	1.07868	0	0	1
638	654.319	1736.55	0.0656035	0.0435367	0.0118291	1.26378	0.839852	1.10371	0	0	1
639	518.711	1655.23	0.136429	0.0373597	0.0012301	0.445903	0.676405	1.1493	0	0	1
640	553.284	1647.49	0.126198	0.0490428	0.0111914	0.919885	0.797922	1.03571	0	0	1
641	910.473	1584.84	0.0928318	0.0508392	0.0180359	1.13324	2.35577	1.27607	0	0	1
642	544.775	1591.3	0.0787459	0.0727691	0.0330536	1.38922	0.921186	1.1322	0	0	1
643	505.777	1475.53	0.0573575	0.024912	0.0392697	0.650778	0.773882	1.07402	0	0	1
644	407.117	2273.33	0.138975	0.0649374	0.0443726	0.790776	0.793475	1.07084	0	0	1
645	540.156	1994.17	0.0678707	0.0046223	0.0242704	0.748701	0.969588	1.17437	0	0	1
646	540.154	1945.9	0.117506	0.0273945	0.0262041	0.733569	0.86785	1.28626	0	0	1
647	437.041	1876.92	0.732329	0.102806	0.0290892	0.153544	1.31592	1.34979	0	0	1
648	437.038	1863.08	0.465541	0.107563	0.0259089	0.358693	1.281	1.33509	0	0	1
649	525.692	1652.28	0.181259	0.0516206	0.0123195	0.591227	0.762398	1.08494	0	0	1
650	526.207	1640.27	0.120524	0.135309	0.00384475	0.771139	0.672708	1.26845	0	0	1
651	600.281	1558.65	0.100889	0.0952419	0.0376034	-0.841468	-0.788985	-1.16272	0	0	1
652	432.075	1891.43	0.102784	0.439738	0.350239	-0.762651	-0.349137	-0.411924	0	0	0
653	574.251	1794.79	0.382806	0.36913	0.743479	0.169999	0.339655	-0.0652694	0	0	0
654	461.276	2418.6	0.0109176	0.705045	0.938659	-0.493746	-0.0667451	0.0165022	0	0	0
655	603.292	2051.9	0.0627262	0.81211	0.152974	-0.270087	0.0432383	-0.214099	0	0	0
656	558.272	1802.76	0.35911	0.998804	0.141044	-0.142881	0.000299484	-0.250984	0	0	0
657	684.322	1445.76	0.714727	0.21518	0.186035	-0.105207	-0.353858	-0.390529	0	0	0
658	542.773	1086.65	0.868793	0.264775	0.532966	-0.0617851	-0.506784	-0.23462	0	0	0
659	586.779	1133.77	0.157816	0.104134	0.0910955	-1.01519	-1.29695	-1.50418	0	0	0
660	490.245	3210.53	0.886722	0.557322	0.712424	0.0651811	-0.217966	0.129999	0	0	0
661	510.331	2779.63	0.816062	0.487676	0.687734	-0.0806115	-0.204676	0.137197	0	0	0
662	425.275	2504.07	0.107624	0.120204	0.219546	-1.11892	-1.02421	-0.78961	0	0	0
663	646.328	1585.62	0.377345	0.315109	0.436126	-0.317884	-0.366875	-0.286362	0	0	0
664	719.335	1521.16	0.0970667	0.603052	0.668557	0.383512	-0.0872728	0.0658545	0	0	0
665	499.255	1127.11	0.277231	0.378943	0.847805	-0.188022	-0.147732	-0.0367309	0	0	0
666	432.081	1691.04	0.190729	0.391035	0.457187	-1.19436	-0.668791	-0.595214	0	0	0
667	440.228	1610.63	0.225337	0.906304	0.529212	0.353964	-0.0326775	0.179294	0	0	0
668	593.299	1551.11	0.196	0.26153	0.681092	-0.217702	-0.279921	-0.0786105	0	0	0
669	622.289	1359.84	0.306027	0.643792	0.378078	0.62488	-0.143282	-0.271049	0	0	0
670	460.284	2713.25	0.262042	0.272424	0.729392	0.569868	0.231246	0.071014	0	0	0
671	497.316	2619.25	0.880439	0.837429	0.702238	-0.0352192	0.0594245	0.0889744	0	0	0
672	652.292	1557.04	0.414977	0.53875	0.358413	-1.35126	-0.953685	-1.85577	0	0	0
673	547.267	1628.09	0.734385	0.240882	0.954436	0.0470384	0.290677	0.0115905	0	0	0
674	646.79	1448.76	0.339537	0.434694	0.243053	-0.378509	-0.328032	-0.497897	0	0	0
675	614.284	1102	0.880541	0.998371	0.527604	-0.0233949	-0.00027263	0.0930963	0	0	0
676	557.275	1026.17	0.935533	0.931767	0.391849	0.00999246	-0.013707	-0.145767	0	0	0
677	483.738	930.563	0.568552	0.242882	0.871136	0.222503	-0.47362	-0.064832	0	0	0
678	481.224	859.209	0.468682	0.646103	0.530485	0.161737	0.0909539	0.129557	0	0	0
679	431.07	3582.93	0.546665	0.747382	0.569027	-0.406908	0.199633	-0.377226	0	0	0
680	382.041	3467.1	0.268119	0.0506139	0.220252	0.45286	1.08914	0.466377	0	0	0
681	448.121	1787.44	0.344812	0.706009	0.694254	-0.485703	-0.19239	-0.191632	0	0	0
682	653.337	1784.32	0.323696	0.9225	0.381874	0.179718	0.0180934	-0.171634	0	0	0
683	883.42	1751.22	0.358	0.176125	0.273995	-0.843753	-1.43105	-1.12067	0	0	0
684	704.33	1582.2	0.954668	0.532695	0.901754	-0.0101252	0.136906	0.0243751	0	0	0
685	744.829	1442.29	0.331264	0.801075	0.951798	0.374641	0.0897495	-0.0190571	0	0	0
686	638.308	1363.66	0.854273	0.616455	0.877369	0.0471923	-0.152068	-0.0470193	0	0	0
687	699.334	1341.51	0.556673	0.160606	0.520213	0.141735	-0.302332	-0.13448	0	0	0
688	624.281	1325.09	0.352316	0.377716	0.243515	-0.150456	-0.165225	-0.168515	0	0	0
689	562.693	1325.58	0.590151	0.136096	0.864993	0.50312	-0.883463	-0.117773	0	0	0
690	716.317	1078.55	0.685537	0.678823	0.870941	0.144094	-0.157733	0.0553107	0	0	0
691	549.704	861.86	0.865833	0.580427	0.708844	-0.0705054	-0.238596	-0.170892	0	0	0
692	556.265	849.722	0.258227	0.501169	0.301624	0.265831	0.207631	0.249565	0	0	0
693	680.332	1783.39	0.32091	0.309564	0.388651	-1.16826	-1.20639	-1.02859	0	0	0
694	475.24	1025.17	0.992716	0.51779	0.709921	-0.00169093	-0.119675	0.0741392	0	0	0
695	662.306	1820.89	0.865327	0.424753	0.521584	0.0324766	0.212087	-0.12256	0	0	0
696	675.311	1461.25	0.50846	0.495664	0.837392	0.126775	0.196165	-0.0408918	0	0	0
697	552.745	1155.45	0.908209	0.551681	0.269478	-0.0343387	-0.159754	-0.331155	0	0	0
698	535.273	1063.17	0.191233	0.236626	0.565387	-0.295167	-0.251472	-0.147642	0	0	0
699	510.243	921.098	0.329053	0.256618	0.602568	0.213614	0.228205	0.127417	0	0	0
700	623.279	912.301	0.519568	0.298164	0.701085	-0.470507	-0.847956	-0.303385	0	0	0
701	519.236	846.536	0.580294	0.39903	0.540884	0.117163	0.2524	0.160324	0	0	0
702	442.002	2839.16	0.446013	0.0285546	0.159677	0.329445	0.943164	0.522992	0	0	0
703	703.326	1830.83	0.645957	0.919334	0.202697	-0.0651595	0.0311571	-0.183347	0	0	0
704	532.269	1838.25	0.358996	0.679157	0.928759	-0.196037	-0.0966917	0.0218939	0	0	0
705	559.261	1801.32	0.32484	0.653836	0.39389	-0.14935	-0.0800424	-0.1262	0	0	0
706	560.266	1765.61	0.389521	0.325107	0.557495	0.180559	0.19305	-0.115141	0	0	0
707	552.781	1768.8	0.962369	0.865047	0.868451	0.0223566	0.0760175	-0.0768272	0	0	0
708	589.777	1687.67	0.824555	0.597387	0.489001	-0.140461	-0.282305	-0.440876	0	0	0
709	500.237	1680.04	0.844096	0.144052	0.120525	-0.0352104	0.289549	0.412445	0	0	0
710	586.279	1639.97	0.824033	0.636086	0.478369	-0.0346527	0.0806547	-0.107037	0	0	0
711	457.226	1560.28	0.409588	0.607983	0.912878	0.190729	0.130809	-0.0242003	0	0	0
712	602.794	1459.55	0.44156	0.751925	0.562367	0.223913	-0.103608	-0.148878	0	0	0
713	658.325	1338.17	0.771037	0.692454	0.454744	0.0718485	-0.0981777	-0.178851	0	0	0
714	666.312	1300.26	0.143739	0.762481	0.963954	0.26011	0.0653288	-0.00929244	0	0	0
715	494.24	961.379	0.814973	0.501169	0.945874	0.05333	-0.141582	0.0159554	0	0	0
716	730.831	865.824	0.829654	0.253308	0.365804	0.242907	-1.70941	-1.32509	0	0	0
717	489.255	3216.91	0.836724	0.238911	0.914188	-0.134483	-0.80155	-0.0657623	0	0	0
718	445.298	2971.36	0.724452	0.629208	0.494008	0.201948	-0.262931	-0.408804	0	0	0
719	433.301	2851.91	0.812484	0.723867	0.89155	-0.147318	-0.166952	0.0641596	0	0	0
720	417.023	2814.18	0.860497	0.159351	0.774674	-0.0642999	0.551544	0.0954379	0	0	0
721	744.361	1546.24	0.410036	0.957293	0.533578	0.119185	-0.00838574	-0.0719715	0	0	0
722	611.289	1517.7	0.145824	0.091375	0.120347	-0.313429	-0.401503	-0.377138	0	0	0
723	632.314	1441.69	0.274298	0.259589	0.384413	-0.213607	-0.20803	-0.188978	0	0	0
724	656.819	1426.34	0.0346812	0.555033	0.117336	0.52695	0.197023	0.466407	0	0	0
725	665.317	1327.71	0.679063	0.99088	0.913792	0.105665	0.00235708	-0.0261785	0	0	0
726	608.29	1261.71	0.973128	0.269128	0.694022	0.00688101	-0.231211	-0.0692042	0	0	0
727	458.231	1251.62	0.717183	0.959519	0.252388	-0.0544585	0.00819342	0.199764	0	0	0
728	628.32	1132.54	0.610173	0.53225	0.30097	-0.323073	-0.472457	-0.802161	0	0	0
729	619.3	1071.55	0.249421	0.249535	0.468684	-1.06265	-1.06241	-0.640736	0	0	0
730	517.744	937.69	0.0211605	0.101818	0.117579	0.815815	0.705667	0.43946	0	0	0
731	455.221	874.791	0.0460604	0.927981	0.252094	0.558969	0.0187031	0.298287	0	0	0
732	444.712	872.697	0.592485	0.378099	0.535359	-0.145786	0.220811	-0.179276	0	0	0
733	519.243	877.988	0.876263	0.258965	0.344338	-0.0301766	-0.233954	-0.185574	0	0	0
734	516.333	795.698	0.659206	0.205324	0.174474	0.161991	0.618371	0.482519	0	0	0
735	429.07	3010.25	0.246434	0.777059	0.470113	-0.845988	-0.193431	-0.469166	0	0	0
736	432.31	2796.57	0.185431	0.632228	0.748386	-1.73348	-0.483593	-0.367266	0	0	0
737	444.135	2339.21	0.0344298	0.787036	0.61591	-0.490389	0.0637155	0.0924287	0	0	0
738	722.338	2107.25	0.196691	0.594405	0.318539	-0.759849	-0.279311	-0.58096	0	0	0
739	600.301	1991.24	0.0307234	0.536107	0.0651749	-0.648257	-0.175487	-0.542483	0	0	0
740	503.249	1984.65	0.177981	0.237396	0.884278	-0.171444	0.227536	0.0259411	0	0	0
741	635.331	1864.63	0.270275	0.9092	0.621614	-0.202959	-0.02603	0.112855	0	0	0
742	625.276	1795.73	0.275005	0.851467	0.32393	-0.285845	-0.0553273	-0.280904	0	0	0
743	803.365	1781.04	0.78652	0.196553	0.778426	-0.0577117	0.319546	0.0696183	0	0	0
744	564.274	1800.22	0.12638	0.973707	0.229403	-0.532287	0.0113206	-0.417533	0	0	0
745	685.331	1773.96	0.659647	0.351814	0.157205	-0.100272	-0.188015	-0.327237	0	0	0
746	699.352	1733.36	0.231682	0.0371205	0.126276	0.190851	0.368158	0.363597	0	0	0
747	724.332	1628.18	0.863589	0.923131	0.0898621	0.0314463	0.0180444	-0.276812	0	0	0
748	644.308	1603.39	0.707499	0.931572	0.648688	0.100381	0.0226023	-0.126873	0	0	0
749	487.24	1543.19	0.254773	0.484243	0.327758	-1.48002	-0.771712	-1.25838	0	0	0
750	530.251	1547.05	0.833057	0.859402	0.792585	-0.0382868	-0.0305229	-0.0504003	0	0	0
751	513.258	1507.09	0.922798	0.809615	0.857099	-0.0179805	0.0510433	0.0351073	0	0	0
752	467.733	1513.67	0.459089	0.331358	0.168016	-0.161259	-0.29897	-0.323425	0	0	0
753	514.256	1512.19	0.716811	0.803479	0.552106	-0.0487369	-0.0408411	0.121161	0	0	0
754	911.433	1501.35	0.0891664	0.209616	0.110271	-0.785317	-0.626085	-0.741155	0	0	0
755	528.253	1475.68	0.172879	0.725966	0.30643	-0.235709	-0.0677846	-0.184721	0	0	0
756	461.242	1445.67	0.627916	0.735839	0.586	-0.204076	-0.155931	-0.240231	0	0	0
757	757.402	1403.31	0.0865822	0.230661	0.099535	-1.04788	-0.755561	-1.07573	0	0	0
758	569.277	1425.82	0.200721	0.23823	0.208226	-1.05311	-0.936319	-1.11374	0	0	0
759	470.239	1347.13	0.0492913	0.194066	0.209518	-0.732193	-0.475587	-0.461698	0	0	0
760	663.313	1317.34	0.0950718	0.206842	0.0888831	-0.756781	-0.595163	-0.833315	0	0	0
761	462.216	1250.51	0.146282	0.165202	0.306461	-0.328937	-0.407689	-0.2668	0	0	0
762	557.296	1236.97	0.297089	0.441848	0.215155	-0.354436	-0.263335	-0.458901	0	0	0
763	741.355	1227.77	0.103586	0.142204	0.0858834	-0.639572	-0.654304	-0.682355	0	0	0
764	442.752	1215.84	0.104472	0.829664	0.832025	-0.619387	0.0904429	0.0884331	0	0	0
765	713.353	1152.19	0.1307	0.222072	0.160034	-1.65292	-1.20228	-1.6032	0	0	0
766	607.285	1142.19	0.453403	0.105005	0.10476	-0.16075	-0.365373	-0.361938	0	0	0
767	570.273	1049.35	0.53717	0.622161	0.84527	0.100748	-0.0839983	0.0286406	0	0	0
768	455.232	997.656	0.20355	0.540637	0.551628	-1.56991	-0.677698	0.634244	0	0	0
769	484.246	1114.17	0.305431	0.185117	0.0597983	-0.180288	-0.248153	-0.303357	0	0	0
770	670.337	1119.3	0.533728	0.459139	0.570612	-0.194966	-0.232098	-0.176529	0	0	0
771	721.338	1076.25	0.208585	0.254339	0.219513	-2.24778	-1.85818	-2.43243	0	0	0
772	494.241	1086.45	0.389119	0.0995412	0.0191334	-0.128444	-0.273718	-0.435247	0	0	0
773	598.305	1058.47	0.350684	0.237693	0.300666	-0.558844	-0.753332	-0.662573	0	0	0
774	660.322	1062.14	0.499222	0.612305	0.1164	-0.102994	-0.121527	-0.286396	0	0	0
775	529.717	994.256	0.23331	0.327547	0.330267	0.539512	-0.462291	-0.493046	0	0	0
776	483.23	945.065	0.776185	0.644633	0.554681	0.0775119	-0.15076	-0.183909	0	0	0
777	441.222	932.742	0.137797	0.718486	0.635576	-0.442611	-0.140229	0.192795	0	0	0
778	580.278	966.763	0.756463	0.970609	0.710352	-0.0658527	-0.00837521	0.0998352	0	0	0
779	528.253	881.544	0.421469	0.14374	0.161616	-0.257475	-0.4872	-0.493727	0	0	0
780	486.733	877.237	0.88566	0.535018	0.384351	0.0279629	0.147246	-0.182788	0	0	0
781	429.071	764.967	0.0924728	0.777169	0.128784	-0.733599	-0.186739	-0.646719	0	0	0
782	445.103	2578.86	0.26579	0.983199	0.620963	-0.77051	-0.0127107	-0.299287	0	0	0
783	431.07	2506.98	0.217145	0.855496	0.477318	-0.774618	-0.100223	-0.391461	0	0	0
784	403.009	2386.16	0.0808053	0.43793	0.750877	-0.466579	0.209783	0.0839269	0	0	0
785	423.071	1911.19	0.421708	0.766389	0.922239	-0.262989	0.101171	-0.0296136	0	0	0
786	546.264	1279.58	0.0917676	0.668955	0.852936	0.461622	0.127079	0.0528829	0	0	0
787	522.265	1126.5	0.559968	0.196385	0.542399	-0.170503	-0.387093	-0.188588	0	0	0
788	529.237	1081.78	0.619893	0.801465	0.763243	-0.279986	-0.142318	0.20618	0	0	0
789	618.293	1040.2	0.0949569	0.676287	0.556427	0.345844	0.0664108	0.105367	0	0	0
790	678.304	959.75	0.31525	0.258423	0.210059	-0.458391	-0.523801	-0.62768	0	0	0
791	487.234	887.7	0.800674	0.433605	0.592254	0.332734	-1.35621	-0.899067	0	0	0
792	411.281	3003.78	0.509268	0.391561	0.444836	-0.229204	-0.272535	-0.300981	0	0	0
793	432.305	2530.68	0.116929	0.171839	0.149828	-2.06642	-1.57502	-1.93571	0	0	0
794	538.277	2188.26	0.482678	0.04274	0.911906	-0.107166	0.533589	-0.0175991	0	0	0
795	504.273	2144.46	0.30246	0.750349	0.534806	-0.132574	0.0445394	-0.0834299	0	0	0
796	647.331	2041.4	0.103268	0.945596	0.203509	-0.77646	-0.0301399	-0.602018	0	0	0
797	596.302	2006.01	0.328143	0.771927	0.111353	-0.271949	-0.0775646	-0.449181	0	0	0
798	633.81	1997.96	0.687873	0.277988	0.490377	0.12547	0.741152	0.209328	0	0	0
799	555.275	1989.96	0.53639	0.328948	0.716611	-0.1367	0.246414	-0.0710138	0	0	0
800	738.379	1947.85	0.0742454	0.101131	0.459783	0.737969	1.72356	0.185202	0	0	0
801	616.302	1860.03	0.0828593	0.369926	0.593853	0.991881	0.730903	-0.243963	0	0	0
802	685.347	1986.45	0.457446	0.936066	0.182205	0.225589	0.0147402	-0.224727	0	0	0
803	525.237	2004.58	0.36343	0.251418	0.393224	-0.137648	0.161866	-0.122049	0	0	0
804	588.785	1911.3	0.971446	0.272675	0.286202	0.0115725	0.626521	-0.358857	0	0	0
805	604.3	1931.84	0.668428	0.157683	0.929254	0.0976033	0.315474	0.0169102	0	0	0
806	721.353	1902.23	0.0452687	0.158769	0.497175	0.865024	0.932365	-0.134578	0	0	0
807	707.365	1923.71	0.191872	0.542896	0.153174	-0.356583	-0.163536	-0.401878	0	0	0
808	615.306	1879.87	0.716616	0.813285	0.869744	-0.0571928	0.0405398	-0.0296268	0	0	0
809	593.285	1905.87	0.143669	0.200932	0.519703	-0.190132	0.483428	-0.10405	0	0	0
810	649.308	1874.23	0.849063	0.874518	0.732363	0.053112	-0.0355993	-0.0862366	0	0	0
811	552.287	1842.29	0.826001	0.32896	0.777107	-0.0517936	0.461543	-0.0704856	0	0	0
812	727.841	1836.15	0.271653	0.274551	0.850323	0.45961	0.65325	-0.0778063	0	0	0
813	694.329	1814.21	0.323331	0.403629	0.155936	-0.408198	-0.339505	-0.632069	0	0	0
814	611.289	1821.88	0.511445	0.698777	0.250807	-0.103218	-0.0689186	-0.197404	0	0	0
815	723.854	1781.31	0.559962	0.591813	0.843797	0.159896	0.249731	0.0592127	0	0	0
816	655.305	1771.68	0.521798	0.877151	0.70665	0.158479	0.03113	-0.075806	0	0	0
817	761.938	1782.08	0.792697	0.271715	0.368485	0.337553	-1.37307	-1.08563	0	0	0
818	541.261	1751.31	0.700254	0.711851	0.807245	0.105817	0.113377	-0.0754612	0	0	0
819	559.277	1720.65	0.395614	0.490083	0.794769	-0.162576	0.148756	0.0533711	0	0	0
820	660.31	1686.9	0.842751	0.658783	0.924883	0.052512	0.130209	-0.0281236	0	0	0
821	744.36	1700.19	0.251493	0.783108	0.699477	-0.353628	0.0806152	-0.117225	0	0	0
822	647.301	1635.85	0.352176	0.254312	0.524673	0.1278	0.184901	-0.107927	0	0	0
823	571.287	1648.7	0.69724	0.973839	0.900931	-0.0719759	-0.00541376	-0.0230807	0	0	0
824	707.342	1587.99	0.542198	0.8107	0.246717	-0.174981	0.0889131	-0.351242	0	0	0
825	764.357	1594.29	0.210786	0.63804	0.888014	0.305503	0.130672	0.0359941	0	0	0
826	622.295	1440.97	0.202873	0.684409	0.210435	0.33629	0.245956	-0.366368	0	0	0
827	585.779	1556.94	0.896757	0.362665	0.507676	0.0607661	-0.49919	-0.373121	0	0	0
828	689.317	1567.21	0.0710191	0.74405	0.0830962	-2.38784	-0.393755	-2.47855	0	0	0
829	905.421	1525.85	0.801177	0.741479	0.983143	0.0983504	-0.134343	-0.00974646	0	0	0
830	669.301	1505.6	0.0810289	0.392628	0.45933	0.519334	0.200979	0.188386	0	0	0
831	430.219	1504.81	0.27945	0.278338	0.360071	-0.399435	-0.408336	-0.343392	0	0	0
832	432.213	1500.05	0.817437	0.605823	0.459325	-0.0973525	-0.198369	-0.33688	0	0	0
833	637.303	1440.89	0.90814	0.196192	0.777702	0.0202144	-0.236237	-0.0464344	0	0	0
834	577.767	1443.78	0.202989	0.109767	0.0876062	-0.517882	-0.701226	-0.83453	0	0	0
835	609.286	1430.46	0.501492	0.729423	0.928532	-0.134233	-0.0674008	-0.0180448	0	0	0
836	639.314	1385.67	0.687337	0.678142	0.643961	-0.0692059	0.125347	-0.0590432	0	0	0
837	706.342	1368.92	0.0951821	0.0353967	0.231419	0.335257	0.326157	0.196995	0	0	0
838	703.816	1307.25	0.291329	0.703543	0.618423	0.306207	0.195665	-0.128762	0	0	0
839	457.227	1194.59	0.291498	0.587703	0.393224	0.593103	-0.273786	-0.40766	0	0	0
840	610.281	1356	0.496839	0.567527	0.621233	-0.195679	-0.147678	-0.127353	0	0	0
841	544.269	1350.19	0.419049	0.426624	0.415922	-0.167515	-0.174044	-0.183826	0	0	0
842	654.304	1332.16	0.568814	0.503172	0.454578	0.101176	-0.111245	-0.120751	0	0	0
843	744.342	1309.54	0.416987	0.670408	0.718574	0.25741	0.246573	-0.112373	0	0	0
844	578.278	1301.71	0.941116	0.369148	0.870395	-0.0140244	-0.190893	-0.0349059	0	0	0
845	469.718	1227.51	0.18239	0.615971	0.964839	1.05367	0.373577	0.0272958	0	0	0
846	651.291	1250.14	0.361148	0.433893	0.651482	-0.236479	-0.24133	-0.119219	0	0	0
847	542.26	1182.08	0.550626	0.840191	0.80644	0.163835	-0.0728721	-0.0760665	0	0	0
848	510.262	1043.71	0.642138	0.453778	0.898656	0.0927919	-0.223071	0.0282945	0	0	0
849	536.755	1201.17	0.920746	0.614504	0.604424	0.0475557	-0.258592	-0.280402	0	0	0
850	599.805	1164.82	0.140904	0.723545	0.5032	0.425647	-0.192388	0.207525	0	0	0
851	600.305	1164.82	0.915323	0.612166	0.405955	-0.0334695	-0.220614	-0.2877	0	0	0
852	492.248	991.714	0.809988	0.320825	0.965522	0.156832	-0.442502	0.0217493	0	0	0
853	526.243	1147.54	0.92691	0.762053	0.929644	0.0182275	-0.0474245	0.0183726	0	0	0
854	734.342	1130.33	0.83186	0.861587	0.101102	-0.0696844	-0.0587975	-0.621366	0	0	0
855	559.763	1120.44	0.965329	0.708965	0.399031	0.0157347	-0.144975	-0.352286	0	0	0
856	641.297	1119.8	0.461994	0.392874	0.436857	-0.216743	-0.255023	-0.211362	0	0	0
857	603.263	1090.85	0.112616	0.341018	0.74252	0.82751	0.565159	-0.106905	0	0	0
858	438.723	1094.19	0.235625	0.132304	0.954388	0.57048	0.560321	-0.0149201	0	0	0
859	554.254	1061.51	0.668034	0.923835	0.703505	0.0698117	0.0220461	0.0644937	0	0	0
860	486.747	1010.76	0.168336	0.610856	0.331377	0.760916	0.139493	0.310777	0	0	0
861	391.707	1012.92	0.833901	0.801425	0.528371	0.0951834	-0.106049	-0.281061	0	0	0
862	615.287	938.914	0.105368	0.925851	0.389319	0.658834	0.0214634	0.197222	0	0	0
863	549.279	947.42	0.872207	0.555404	0.473302	0.055978	-0.202124	-0.289703	0	0	0
864	633.297	992.463	0.818	0.873	0.520306	-0.043987	0.0700852	0.171225	0	0	0
865	544.746	995.472	0.154632	0.0639179	0.21959	-0.383679	-0.579246	-0.382741	0	0	0
866	586.273	886.654	0.0460696	0.992257	0.811556	0.365969	0.00170805	0.0504581	0	0	0
867	663.324	984.039	0.296857	0.79678	0.685452	1.03184	-0.113932	0.227858	0	0	0
868	610.777	989.29	0.877179	0.646951	0.719116	0.104311	-0.268595	0.28787	0	0	0
869	471.23	932.222	0.710062	0.87181	0.624625	-0.0956437	-0.0329833	0.113536	0	0	0
870	549.748	924.479	0.793801	0.795229	0.67191	0.0633445	-0.0648486	-0.108129	0	0	0
871	480.234	895.86	0.948263	0.600258	0.305196	0.00987917	0.14123	0.183253	0	0	0
872	577.798	825.262	0.351223	0.41955	0.800015	0.386642	0.414263	0.1113	0	0	0
873	606.3	822.731	0.696232	0.859239	0.904692	-0.103004	0.0604068	0.0315486	0	0	0
874	445.101	800.307	0.134087	0.939651	0.546917	-0.588192	0.0395817	-0.209601	0	0	0
875	484.308	3082.65	0.753455	0.372659	0.632105	-0.169415	-0.401078	-0.252383	0	0	0
876	465.328	2930.51	0.493151	0.324652	0.782055	-0.252763	0.76313	-0.0940944	0	0	0
877	432.304	2994.56	0.820284	0.29318	0.419213	0.157959	-0.546114	-0.467651	0	0	0
878	391.062	2956.79	0.372179	0.0352836	0.0491247	0.190051	0.818432	0.498992	0	0	0
879	412.289	2940.06	0.837667	0.634408	0.391403	-0.0992422	-0.19693	-0.401243	0	0	0
880	419.027	2901.51	0.664524	0.00596094	0.0499588	0.0915113	0.632683	0.541799	0	0	0
881	416.294	2848.51	0.371297	0.408343	0.275179	-0.332832	-0.289342	-0.387169	0	0	0
882	404.03	2836.94	0.8798	0.0160297	0.168324	0.0367664	0.713624	0.411318	0	0	0
883	497.319	2704.43	0.798715	0.361846	0.657348	-0.0754601	-0.268431	-0.138629	0	0	0
884	514.322	2668.08	0.956354	0.219215	0.943156	0.0199226	0.563442	0.0274578	0	0	0
885	416.045	2699.38	0.209888	0.504585	0.821529	-0.296908	0.176351	0.0642143	0	0	0
886	416.024	2671.47	0.130517	0.423727	0.950071	-0.413906	0.212135	0.016883	0	0	0
887	425.263	2532.33	0.229656	0.508706	0.358439	-0.819496	-0.39408	-0.609193	0	0	0
888	427.284	2478.13	0.0748067	0.692743	0.109356	-2.18044	-0.410262	-1.92634	0	0	0
889	446.312	2449.11	0.534069	0.910427	0.410235	-0.185029	0.0246487	-0.200475	0	0	0
890	447.313	2450.78	0.109179	0.343657	0.21977	-1.01814	-0.532855	-0.768702	0	0	0
891	432.277	2265.14	0.0432802	0.999512	0.214499	-0.854284	-0.000232482	-0.485008	0	0	0
892	742.397	2228.39	0.792871	0.0733378	0.94851	0.0892111	0.688917	0.0179885	0	0	0
893	401.231	2210.03	0.174211	0.478231	0.647072	-0.329823	0.12988	0.0964716	0	0	0
894	513.25	2153.72	0.188086	0.0580495	0.696261	-0.20157	0.278652	-0.0564967	0	0	0
895	531.256	2099.23	0.0454015	0.712526	0.332719	-0.242929	0.0482431	-0.117329	0	0	0
896	603.32	2119.47	0.198627	0.121585	0.295593	-0.161095	0.208746	0.17436	0	0	0
897	664.309	2117.74	0.567329	0.146743	0.741935	-0.131561	0.429494	-0.0865876	0	0	0
898	504.278	2102.44	0.842586	0.207049	0.702378	-0.035769	0.229218	0.0982276	0	0	0
899	523.22	2100.13	0.839521	0.817491	0.874387	0.0556568	0.0493625	0.0361341	0	0	0
900	538.247	2095.19	0.116629	0.192846	0.779219	-0.229304	0.406655	-0.0448526	0	0	0
901	573.285	2057.67	0.727279	0.633155	0.468899	-0.0834101	-0.0897638	-0.155228	0	0	0
902	518.259	2063.05	0.526663	0.234107	0.82973	0.0708702	0.197656	0.0251469	0	0	0
903	441.24	2052.32	0.610469	0.392488	0.857913	-0.105035	0.149642	0.0309971	0	0	0
904	720.389	2034.19	0.767205	0.247894	0.532935	-0.0561108	0.300292	-0.120322	0	0	0
905	697.342	1989.17	0.173564	0.0814815	0.320928	0.299616	0.36764	0.165415	0	0	0
906	688.336	1984.01	0.350375	0.519529	0.38287	-0.951003	-0.58687	-0.935323	0	0	0
907	631.298	2000.49	0.788607	0.188618	0.167151	-0.0397852	0.261287	-0.201916	0	0	0
908	551.242	1999.46	0.705489	0.177269	0.0578218	-0.0398274	0.448247	0.269401	0	0	0
909	599.291	1965.29	0.732066	0.0341551	0.190549	0.0431016	0.461483	0.184971	0	0	0
910	432.068	1977.12	0.240735	0.749082	0.430373	-0.569428	-0.151137	-0.360657	0	0	0
911	542.281	1949.46	0.391344	0.206119	0.739166	0.320097	0.40374	-0.0874275	0	0	0
912	666.32	1966.37	0.0160122	0.0634005	0.0384532	0.425949	0.523871	0.181412	0	0	0
913	488.264	1949.47	0.594816	0.783567	0.731029	-0.188682	0.0741975	-0.112821	0	0	0
914	520.22	1942.4	0.890723	0.233047	0.803559	0.0178606	0.906678	-0.030476	0	0	0
915	581.277	1950.8	0.377848	0.704406	0.667262	0.218164	0.0750352	-0.0795636	0	0	0
916	393.108	1899.32	0.0791266	0.187437	0.117382	-1.19777	-0.877551	-1.08596	0	0	0
917	677.326	1876.61	0.51287	0.569145	0.66553	-0.0913908	0.0762853	0.0578667	0	0	0
918	871.37	1854.13	0.0801793	0.258874	0.312545	2.0991	1.23844	1.04861	0	0	0
919	765.838	1819.68	0.341919	0.318607	0.338175	-1.67929	-1.84537	-1.90148	0	0	0
920	605.291	1790.82	0.648178	0.0319095	0.038019	-0.148847	-0.537829	-0.55311	0	0	0
921	554.268	1790.38	0.307149	0.19961	0.894751	0.251677	0.290748	0.0246774	0	0	0
922	567.275	1570.84	0.32533	0.737888	0.249827	0.229764	0.13269	-0.262045	0	0	0
923	537.759	1756.9	0.103752	0.52356	0.422676	0.495544	0.120919	0.195091	0	0	0
924	743.855	1707.55	0.879413	0.894782	0.592416	0.0664366	0.0574365	0.218564	0	0	0
925	649.31	1655.91	0.671367	0.987486	0.778593	-0.073104	-0.00273187	-0.0555209	0	0	0
926	564.774	1639.18	0.0598062	0.0697696	0.47401	0.598764	0.490617	0.187827	0	0	0
927	540.741	1527.62	0.174816	0.608173	0.487064	0.994909	-0.187068	-0.254953	0	0	0
928	618.304	1436.12	0.0754997	0.149605	0.479169	0.383607	0.225873	0.0959402	0	0	0
929	605.787	1579.61	0.454139	0.59217	0.30052	-0.711535	-0.522944	-1.2042	0	0	0
930	837.334	1570.28	0.0243384	0.30234	0.183965	0.604709	0.418508	0.177728	0	0	0
931	562.269	1526.41	0.338423	0.300897	0.307071	-0.516108	-0.565946	-0.600197	0	0	0
932	790.367	1566.52	0.065208	0.226546	0.201032	0.547746	0.27074	0.284362	0	0	0
933	649.307	1576.11	0.21534	0.593921	0.825544	0.221606	0.0981806	-0.0282062	0	0	0
934	658.324	1295.11	0.242606	0.363283	0.597289	0.232814	0.20096	-0.0929292	0	0	0
935	708.331	1530.03	0.141104	0.172254	0.0925555	-0.430455	-0.436327	-0.570321	0	0	0
936	700.351	1547.87	0.193735	0.949397	0.831976	0.16602	-0.00844458	-0.0308958	0	0	0
937	771.358	1435	0.0366378	0.124079	0.0802737	0.506503	0.49517	0.358433	0	0	0
938	732.355	1432.54	0.0913325	0.296354	0.29348	0.270343	0.245621	0.192023	0	0	0
939	531.755	1515.85	0.92266	0.809638	0.939121	-0.0525966	-0.127108	0.0416102	0	0	0
940	552.266	1515.7	0.404919	0.347059	0.342162	-0.932784	-1.11832	-1.23985	0	0	0
941	444.72	1507.16	0.678844	0.157977	0.262688	0.124947	0.761205	0.327647	0	0	0
942	687.315	1506.55	0.205505	0.283939	0.203647	-0.539446	-0.458552	-0.572788	0	0	0
943	682.318	1442.77	0.433711	0.732038	0.877325	0.165521	0.095382	-0.0345155	0	0	0
944	621.3	1439.54	0.288135	0.978892	0.252357	-0.172966	0.00573878	-0.206822	0	0	0
945	482.232	1434.28	0.515552	0.572567	0.582137	0.105671	0.0944118	0.100387	0	0	0
946	639.318	1440.3	0.0727558	0.579149	0.396258	0.259591	-0.0923932	-0.131164	0	0	0
947	689.819	1432.76	0.000102712	0.00889819	0.00476493	0.932118	0.749273	0.663851	0	0	0
948	624.288	1432.91	0.369112	0.955176	0.976173	0.146198	0.00864577	0.00537186	0	0	0
949	683.311	1435.25	0.722844	0.459609	0.49031	0.0903238	-0.202044	-0.164613	0	0	0
950	582.268	1432.64	0.793688	0.633612	0.86562	-0.0848701	-0.157545	-0.0572264	0	0	0
951	510.235	1439.45	0.00765661	0.172825	0.147131	0.33433	0.177499	0.131301	0	0	0
952	596.919	1430.09	0.458246	0.285079	0.380439	0.325936	-0.487606	-0.39594	0	0	0
953	620.295	1394.78	0.190028	0.762322	0.800257	-0.164471	0.0758034	0.0326043	0	0	0
954	482.235	1315.01	0.616336	0.317754	0.307484	0.142391	0.159342	0.208725	0	0	0
955	549.293	1380.78	0.0484752	0.447883	0.741469	-0.508107	-0.182236	0.107629	0	0	0
956	500.237	1359.99	0.0158502	0.285588	0.0719168	-0.736092	-0.317533	-0.554859	0	0	0
957	409.209	1372.37	0.141304	0.308722	0.254951	0.552881	0.231876	0.292845	0	0	0
958	528.749	1333.95	0.220386	0.30476	0.0502672	-0.314687	-0.280796	-0.533149	0	0	0
959	506.249	1323.24	0.284562	0.145849	0.239196	-0.34226	-0.466218	-0.382697	0	0	0
960	637.299	1298.58	0.718081	0.160678	0.235417	-0.0525548	-0.215996	-0.187765	0	0	0
961	621.92	1253.6	0.195051	0.66057	0.914233	1.16192	-0.278294	0.0591035	0	0	0
962	409.212	1274.54	0.612042	0.296188	0.484066	0.135976	-0.258069	-0.174636	0	0	0
963	430.207	1296.48	0.130849	0.139217	0.245813	-0.757162	-0.783345	-0.581441	0	0	0
964	620.304	1255.02	0.818217	0.376199	0.260992	0.0298162	0.278178	0.141347	0	0	0
965	662.311	1260.64	0.818825	0.243679	0.927404	0.0682619	-0.346754	0.0308324	0	0	0
966	653.298	1228.02	0.606368	0.0334311	0.877106	0.12292	-0.451153	0.0306334	0	0	0
967	433.246	1211.4	0.0177933	0.429577	0.926849	-0.695775	0.337277	0.0365139	0	0	0
968	622.791	1247.22	0.359474	0.842451	0.87533	0.184925	0.0450554	0.0376068	0	0	0
969	492.258	1191.47	0.142441	0.0548821	0.0540724	-0.17715	-0.265444	-0.19273	0	0	0
970	667.311	1093.18	0.336933	0.827408	0.32153	0.293228	-0.0739242	-0.310039	0	0	0
971	492.251	1159.16	0.017613	0.00357583	0.506491	-0.439692	-0.532625	-0.162064	0	0	0
972	490.252	1046.13	0.299557	0.345008	0.147718	0.136499	0.124839	0.223304	0	0	0
973	640.291	1124.35	0.357922	0.231886	0.27148	-0.52774	-0.743699	-0.693498	0	0	0
974	615.789	1114.88	0.426691	0.258107	0.202973	-0.436999	-0.631195	-0.740586	0	0	0
975	610.289	1138.49	0.927997	0.930008	0.244545	0.0168403	0.0161196	-0.24265	0	0	0
976	546.262	1158	0.367621	0.216108	0.260486	-0.356639	-0.508744	-0.490611	0	0	0
977	591.28	1089.23	0.818122	0.049899	0.444618	0.0724358	-0.403454	-0.151458	0	0	0
978	660.322	1091.17	0.737295	0.736723	0.611885	-0.0628117	-0.0614455	-0.100341	0	0	0
979	753.354	1058.33	0.221113	0.558963	0.672127	0.476462	-0.201563	-0.155497	0	0	0
980	515.274	1033.26	0.768827	0.938629	0.473606	-0.0794959	-0.02675	-0.210479	0	0	0
981	487.742	1019.16	0.10536	0.896089	0.639212	0.464725	-0.0276174	0.11581	0	0	0
982	704.344	987.316	0.823064	0.275429	0.457638	-0.0588169	-0.281117	-0.189439	0	0	0
983	638.323	948.072	0.667776	0.852007	0.794991	0.119745	0.0463244	-0.0799346	0	0	0
984	770.352	948.728	0.908981	0.326229	0.314907	-0.0786788	-0.803316	-0.862794	0	0	0
985	558.274	945.26	0.975338	0.767295	0.759248	-0.00873552	-0.0855968	-0.0906023	0	0	0
986	558.77	948.156	0.556398	0.390298	0.382888	0.16459	-0.253692	-0.279646	0	0	0
987	497.239	946.75	0.733584	0.534589	0.396032	-0.0592464	-0.12227	-0.189735	0	0	0
988	615.772	906.64	0.156563	0.223821	0.0458671	0.519235	0.392056	0.828419	0	0	0
989	571.769	863.546	0.770269	0.819303	0.86906	0.0848336	0.0751356	0.0551768	0	0	0
990	630.276	873.363	0.642558	0.213646	0.771537	-0.165801	0.457049	0.108659	0	0	0
991	570.775	890.225	0.0451574	0.728872	0.436155	0.661212	0.0852021	0.242526	0	0	0
992	631.291	867.87	0.572995	0.193297	0.892252	-0.0950839	0.276882	0.0265809	0	0	0
993	568.736	867.384	0.0585072	0.0493786	0.258953	0.988428	0.758835	0.572762	0	0	0
994	409.671	804.004	0.769831	0.469835	0.546424	-0.127813	0.333956	0.327224	0	0	0
995	445.102	777.655	0.24554	0.85907	0.440665	-0.473138	0.112961	-0.273686	0	0	0
996	450.2	801.41	0.89536	0.475866	0.471048	0.0634679	0.44085	0.296047	0	0	0
997	393.034	778.833	0.137904	0.398439	0.166791	-1.35326	-0.687902	-1.29861	0	0	0
998	445.103	747.382	0.136772	0.8327	0.291233	-0.690417	-0.142808	-0.424773	0	0	0
999	484.303	2880.26	0.473012	0.499389	0.567332	0.285848	0.290551	0.20498	0	0	0
1000	485.315	2838.68	0.763683	0.794143	0.976632	-0.0786137	0.0626181	0.00778975	0	0	0
1001	447.291	2807.42	0.269792	0.725021	0.564662	-0.465873	-0.129382	-0.232863	0	0	0
1002	485.31	2760.94	0.0431421	0.911894	0.0833184	-0.551216	-0.041726	-0.485979	0	0	0
1003	444.297	2709.45	0.225302	0.773061	0.131708	-0.7689	-0.211454	-1.03566	0	0	0
1004	444.304	2636.53	0.172549	0.127927	0.301764	1.02927	1.51284	0.601944	0	0	0
1005	497.327	2657.29	0.731714	0.786667	0.826103	-0.110975	0.0845678	-0.0670445	0	0	0
1006	461.277	2546.98	0.823403	0.0276353	0.677354	-0.0394377	0.497635	0.0854693	0	0	0
1007	459.281	2399.57	0.0673069	0.627192	0.447776	-0.559308	-0.133186	-0.223502	0	0	0
1008	446.278	2383.53	0.126438	0.539713	0.24888	-0.34098	0.126679	-0.272501	0	0	0
1009	403.181	2331.37	0.421429	0.125168	0.900426	-0.134105	0.378013	0.0262334	0	0	0
1010	459.242	2253.15	0.158471	0.702494	0.34125	-0.825225	-0.185852	-0.539387	0	0	0
1011	651.784	2219.61	0.259154	0.513141	0.916327	0.639118	0.375615	0.0423543	0	0	0
1012	588.304	2159.76	0.401924	0.0690304	0.215118	-0.111834	0.333913	0.16267	0	0	0
1013	575.285	2125.69	0.398069	0.594337	0.907737	0.300088	0.16478	0.0381568	0	0	0
1014	715.32	2114.63	0.282785	0.245717	0.706545	0.23191	1.07972	0.0877335	0	0	0
1015	760.398	2106.71	0.648911	0.136277	0.941209	0.135686	0.477312	-0.0171194	0	0	0
1016	631.308	2066.6	0.763795	0.276953	0.53748	0.0326285	0.181504	-0.0920685	0	0	0
1017	689.339	2052.45	0.236353	0.218568	0.316266	0.489244	0.23452	0.169792	0	0	0
1018	602.301	2034.41	0.225392	0.0748648	0.0483351	-0.126285	0.445564	-0.188047	0	0	0
1019	408.135	2039.96	0.160045	0.278623	0.0267682	-0.269865	0.262419	0.555954	0	0	0
1020	420.216	2028.11	0.801988	0.192597	0.432516	0.0513851	0.269103	0.128016	0	0	0
1021	601.786	1962.02	0.0341598	0.162353	0.753538	0.791435	0.429014	0.0697085	0	0	0
1022	618.297	1965.5	0.468417	0.772865	0.737097	-0.225236	-0.0888433	-0.116278	0	0	0
1023	697.342	1953.66	0.24931	0.185606	0.493002	0.286933	0.607745	0.141922	0	0	0
1024	563.29	1951.72	0.0743651	0.0560482	0.581838	0.741894	0.783517	0.0629351	0	0	0
1025	528.243	1961.01	0.329712	0.15339	0.714925	0.222688	0.303795	-0.0579689	0	0	0
1026	528.253	1940.9	0.165494	0.195814	0.609074	0.252672	0.230735	0.105434	0	0	0
1027	603.29	1928.71	0.807217	0.91567	0.223209	0.0416176	0.0216758	-0.173451	0	0	0
1028	675.325	1939.31	0.43366	0.40576	0.737136	-0.119785	0.180019	-0.0451784	0	0	0
1029	614.304	1929.17	0.120953	0.452665	0.753764	-0.311039	0.218927	-0.0738478	0	0	0
1030	829.383	1918.24	0.128426	0.359563	0.712751	0.813013	0.533255	0.162383	0	0	0
1031	585.293	1927.83	0.472194	0.128202	0.277589	0.146188	0.321811	0.165271	0	0	0
1032	813.408	1932.63	0.0742447	0.0848584	0.415571	0.819278	1.33234	0.134358	0	0	0
1033	720.345	1909.98	0.127526	0.267056	0.724172	1.03766	1.0861	-0.121957	0	0	0
1034	572.288	1935.73	0.517424	0.43535	0.547059	0.220278	0.348543	-0.124619	0	0	0
1035	595.258	1921.09	0.603485	0.881217	0.228823	-0.148488	0.042963	-0.363158	0	0	0
1036	527.222	1933.46	0.390097	0.0874449	0.482603	0.404746	0.654046	-0.252551	0	0	0
1037	558.273	1899.53	0.213478	0.339965	0.58378	-0.24568	0.246169	-0.113741	0	0	0
1038	754.348	1912.95	0.43328	0.971577	0.898834	-0.243889	0.010151	0.0434102	0	0	0
1039	639.297	1913.02	0.242816	0.180099	0.477954	0.407243	0.582373	-0.173374	0	0	0
1040	523.206	1892.71	0.956645	0.261267	0.492716	-0.0160867	0.359929	0.203987	0	0	0
1041	813.393	1902.76	0.0529857	0.0676072	0.208714	1.43636	1.08125	0.264773	0	0	0
1042	762.851	1900.93	0.178465	0.257792	0.601144	0.729824	0.580479	-0.139435	0	0	0
1043	837.37	1881.53	0.100902	0.0549103	0.224855	0.431999	0.708099	0.35963	0	0	0
1044	596.266	1852.67	0.643526	0.152255	0.477242	0.0985454	0.515283	-0.107775	0	0	0
1045	559.266	1839.76	0.810463	0.039303	0.346503	0.0465109	0.480563	0.236081	0	0	0
1046	537.231	1860.04	0.919611	0.615911	0.48763	-0.0153853	0.0615111	0.100601	0	0	0
1047	609.269	1822.03	0.413886	0.923914	0.589335	-0.166665	-0.0193275	-0.135572	0	0	0
1048	590.278	1817.67	0.559982	0.062426	0.414369	0.0879997	0.241291	0.126663	0	0	0
1049	708.336	1824.32	0.95998	0.932525	0.959211	-0.00880852	0.0140528	-0.0114032	0	0	0
1050	712.336	1817.17	0.711366	0.0664324	0.61153	-0.0519173	0.320042	0.0848308	0	0	0
1051	621.299	1802.92	0.0953302	0.497434	0.405531	0.358465	0.0883363	-0.104435	0	0	0
1052	718.318	1800.18	0.552494	0.518208	0.907264	-0.502989	-0.548861	-0.115678	0	0	0
1053	644.314	1799.62	0.587441	0.442864	0.697406	0.0909809	0.174738	0.0823935	0	0	0
1054	666.299	1789.95	0.0523822	0.0738258	0.0453962	-0.53633	-0.457509	-0.68705	0	0	0
1055	896.913	1787.67	0.118028	0.75242	0.747078	0.816151	0.17313	0.157389	0	0	0
1056	780.855	1796.77	0.784274	0.788544	0.656676	-0.0901986	-0.0967712	-0.162496	0	0	0
1057	588.79	1775.79	0.766085	0.535376	0.909356	0.103456	0.368459	-0.040159	0	0	0
1058	677.328	1772.33	0.194548	0.219601	0.690311	0.236882	0.237872	-0.0595655	0	0	0
1059	619.784	1769.76	0.329725	0.501343	0.550946	0.371337	0.242124	-0.214118	0	0	0
1060	781.351	1789.28	0.0661734	0.132742	0.215538	0.475714	0.32526	0.314819	0	0	0
1061	713.313	1780.57	0.304937	0.143261	0.124895	0.220187	0.291316	0.320604	0	0	0
1062	694.325	1771.56	0.169748	0.0123948	0.385766	0.337393	0.474555	0.146202	0	0	0
1063	965.54	1747.03	0.0189478	0.294102	0.990935	0.944397	0.486739	0.00445462	0	0	0
1064	743.387	1754.58	0.90069	0.499882	0.218519	0.0211972	-0.105357	-0.21752	0	0	0
1065	463.232	1752.62	0.939977	0.230723	0.302138	-0.0122512	0.159342	0.208933	0	0	0
1066	643.804	1753.41	0.25805	0.997472	0.555427	0.560728	0.000986476	-0.169867	0	0	0
1067	543.266	1752.33	0.545708	0.259992	0.811564	0.124028	-0.20488	0.0580088	0	0	0
1068	642.307	1745.23	0.12463	0.297627	0.136861	-0.722053	-0.472515	-0.748612	0	0	0
1069	677.323	1754.03	0.280551	0.876028	0.769235	0.201402	0.0285797	-0.0464456	0	0	0
1070	674.815	1717.57	0.213485	0.577422	0.609147	0.26902	0.158626	0.112668	0	0	0
1071	589.785	1633.45	0.0642398	0.194712	0.302732	1.10415	0.774707	0.537715	0	0	0
1072	688.322	1666.6	0.453484	0.605501	0.387878	-0.150792	0.0944419	-0.141541	0	0	0
1073	611.285	1656.74	0.393728	0.829052	0.169252	0.248327	-0.0494997	-0.33327	0	0	0
1074	616.794	1644.73	0.936686	0.504016	0.507263	0.0389792	-0.35576	-0.366857	0	0	0
1075	474.238	1660.43	0.351199	0.881834	0.970494	-0.239959	0.0319734	-0.00834711	0	0	0
1076	650.316	1636.92	0.0367886	0.1542	0.353065	0.497839	0.324921	0.189222	0	0	0
1077	594.294	1636.92	0.502642	0.556117	0.276858	-0.253996	-0.227656	-0.466164	0	0	0
1078	567.274	1639.09	0.438252	0.832292	0.0206067	-0.169727	0.065824	-0.57164	0	0	0
1079	461.236	1638.03	0.650385	0.662056	0.531951	-0.0652052	-0.0648895	-0.112142	0	0	0
1080	513.245	1629.32	0.243528	0.530236	0.254137	-0.406068	-0.207082	-0.41919	0	0	0
1081	674.318	1601.36	0.751145	0.735601	0.192425	-0.123341	-0.145942	-0.523026	0	0	0
1082	706.348	1606.65	0.563462	0.54293	0.381945	-0.224796	-0.240795	-0.379774	0	0	0
1083	642.313	1628.56	0.0168591	0.0552482	0.224296	0.466086	0.34949	0.218423	0	0	0
1084	610.296	1624.95	0.389782	0.617712	0.710492	-0.275121	-0.15963	-0.121226	0	0	0
1085	596.776	1611.41	0.560669	0.999151	0.435797	-0.148318	-0.000328989	-0.229735	0	0	0
1086	607.292	1586.53	0.191153	0.765353	0.434073	-0.2474	-0.058942	-0.156319	0	0	0
1087	719.337	1572.81	0.0317047	0.312549	0.482809	0.345004	0.194247	0.0865765	0	0	0
1088	439.216	1382.98	0.216065	0.776527	0.788548	-0.207665	0.101688	-0.0486431	0	0	0
1089	620.291	1557.04	0.660277	0.716712	0.786056	0.106647	-0.10632	-0.0713092	0	0	0
1090	563.267	1555.76	0.922534	0.436905	0.515451	-0.0167129	0.12563	-0.0911134	0	0	0
1091	555.26	1548.83	0.609311	0.478511	0.393093	0.214323	-0.130702	-0.164363	0	0	0
1092	516.26	1534.34	0.129568	0.268986	0.501429	-0.264264	-0.241366	-0.123596	0	0	0
1093	601.281	1522.9	0.775538	0.422324	0.444989	-0.134843	-0.369255	-0.361771	0	0	0
1094	575.773	1531.05	0.0543032	0.268054	0.669233	0.360691	0.531111	0.0885336	0	0	0
1095	662.307	1470.11	0.160141	0.269528	0.166384	-0.721029	-0.608443	-0.744177	0	0	0
1096	651.302	1450.67	0.217276	0.442056	0.214573	0.167276	0.10538	0.189166	0	0	0
1097	524.247	1426.09	0.0595704	0.921344	0.217464	-0.288796	-0.0169346	-0.211127	0	0	0
1098	412.731	1384.63	0.0468111	0.174843	0.225531	-0.419596	0.3431	0.319173	0	0	0
1099	637.3	1387	0.153963	0.928641	0.362952	0.20144	0.0131102	0.119625	0	0	0
1100	524.248	1384.4	0.16748	0.762752	0.203567	-0.20894	0.0555693	0.215797	0	0	0
1101	478.258	1361.94	0.239987	0.401265	0.442011	-0.849369	-0.539939	-0.519739	0	0	0
1102	536.275	1294.78	0.2242	0.509766	0.453822	-0.647258	-0.31715	-0.386727	0	0	0
1103	603.791	1336.91	0.179703	0.564611	0.46822	0.612618	0.192221	0.252348	0	0	0
1104	594.287	1318.68	0.612569	0.876065	0.748342	0.143134	-0.0517756	-0.103906	0	0	0
1105	434.74	1200.97	0.205905	0.156942	0.169919	0.604285	0.60916	0.670621	0	0	0
1106	552.263	1292.92	0.431081	0.578842	0.49741	-0.162736	-0.0966287	-0.165002	0	0	0
1107	492.259	1215.08	0.721033	0.635159	0.756539	-0.0465715	-0.083466	-0.034224	0	0	0
1108	564.769	1268.21	0.14187	0.607313	0.960752	0.370584	0.109617	0.010517	0	0	0
1109	658.318	1220.64	0.0852192	0.560679	0.827218	0.522432	-0.144689	-0.0634164	0	0	0
1110	665.811	1225.71	0.206169	0.634146	0.460726	0.510519	0.211447	0.247779	0	0	0
1111	554.774	1231.15	0.826164	0.221865	0.288927	-0.0795099	-0.408921	-0.385611	0	0	0
1112	525.242	1230.33	0.553206	0.354765	0.449296	-0.249005	-0.405948	-0.332615	0	0	0
1113	454.241	1166.43	0.0422974	0.172901	0.0733312	-0.498551	-0.311577	-0.446444	0	0	0
1114	602.285	1147.41	0.933978	0.141433	0.179322	-0.0114891	-0.221605	-0.189398	0	0	0
1115	527.266	1166.63	0.743634	0.665193	0.975115	-0.0556975	0.0671783	-0.00590796	0	0	0
1116	480.237	1098.67	0.0855863	0.22768	0.104286	-0.775949	-0.508791	-0.753074	0	0	0
1117	622.299	1140.43	0.581787	0.315969	0.316716	-0.362795	-0.732256	-0.788959	0	0	0
1118	551.759	1138.39	0.29799	0.506113	0.533145	0.318214	0.254897	0.168686	0	0	0
1119	471.745	1117.62	0.549935	0.561898	0.556521	-0.479245	-0.4618	-0.522981	0	0	0
1120	636.308	1084.74	0.0486853	0.527707	0.887978	0.784903	0.250326	-0.0473505	0	0	0
1121	464.756	1070.47	0.132257	0.160854	0.339562	0.725096	0.451558	0.421176	0	0	0
1122	666.81	1100.54	0.318425	0.683373	0.510947	0.331681	0.181061	-0.243494	0	0	0
1123	504.739	1081.59	0.671675	0.945702	0.921537	0.142977	-0.0205105	0.0424055	0	0	0
1124	410.21	1076.69	0.682396	0.314984	0.899857	-0.0777269	-0.217507	-0.026881	0	0	0
1125	554.758	1105.23	0.481708	0.327471	0.341396	-0.31772	-0.433829	-0.428174	0	0	0
1126	830.379	1081.76	0.100853	0.0623518	0.202411	0.791693	0.755179	0.538132	0	0	0
1127	475.241	1077.19	0.57468	0.361041	0.563556	0.0847769	0.167692	0.126025	0	0	0
1128	512.235	1037.19	0.527793	0.311385	0.453695	-0.43383	-0.771207	-0.574245	0	0	0
1129	438.226	1088.71	0.38811	0.113817	0.984073	0.477089	0.628548	0.00669219	0	0	0
1130	500.248	1015.92	0.00886887	0.0049295	0.279374	0.403362	0.374875	0.147504	0	0	0
1131	424.213	1050.07	0.611922	0.564015	0.664415	0.117234	-0.12677	0.111688	0	0	0
1132	547.744	1077.09	0.176252	0.894326	0.235282	0.546987	-0.0409431	0.458195	0	0	0
1133	578.778	1011.4	0.0323826	0.743383	0.310543	0.986577	-0.120682	0.332576	0	0	0
1134	459.234	960.362	0.562187	0.546919	0.902018	0.11385	-0.114485	-0.0230333	0	0	0
1135	397.2	922.397	0.676075	0.749997	0.7704	0.0999216	-0.07315	-0.0645523	0	0	0
1136	593.276	946.262	0.859241	0.997965	0.596139	0.0381045	0.000530677	-0.125033	0	0	0
1137	471.758	911.198	0.206044	0.373042	0.672847	0.728799	0.55303	0.318766	0	0	0
1138	494.733	872.88	0.507595	0.38511	0.789681	-0.147977	0.25419	-0.0642889	0	0	0
1139	547.252	865.787	0.716565	0.220864	0.439622	0.0685909	0.264986	-0.180054	0	0	0
1140	498.739	858.074	0.211923	0.172887	0.937779	-0.549735	0.936369	-0.0343783	0	0	0
1141	491.736	825.364	0.758083	0.347419	0.888331	0.140252	0.494175	0.0776618	0	0	0
1142	479.74	823.502	0.142506	0.139624	0.455195	0.503105	0.650041	0.321225	0	0	0
1143	432.073	3581.84	0.539618	0.602069	0.834877	-0.329829	0.257302	-0.103047	0	0	0
1144	448.119	3583.6	0.403276	0.789499	0.89464	-0.386616	0.114063	-0.0571844	0	0	0
1145	447.1	3568.65	0.494634	0.850142	0.925433	-0.416361	0.109648	-0.0494158	0	0	0
1146	440.053	3535.47	0.552768	0.101733	0.28009	-0.134443	0.372243	0.305425	0	0	0
1147	430.07	3521.45	0.293644	0.889816	0.561381	-0.71363	-0.0813841	-0.347225	0	0	0
1148	469.128	3527.58	0.968511	0.343952	0.161184	0.0146296	0.293545	0.402132	0	0	0
1149	424.032	3501.6	0.982271	0.0221128	0.156206	-0.00578749	0.844962	0.452833	0	0	0
1150	502.078	3502.77	0.104581	0.724266	0.910094	-0.714775	-0.144444	-0.040115	0	0	0
1151	448.107	3515.79	0.321236	0.621651	0.931534	-0.488851	0.22483	0.0364435	0	0	0
1152	469.121	3502.1	0.456337	0.910653	0.357475	-0.236423	0.0315226	0.272844	0	0	0
1153	384.092	3421.55	0.47294	0.482027	0.815585	-0.234174	-0.162434	0.0589621	0	0	0
1154	386.126	3390.84	0.373869	0.288153	0.971019	-0.277663	0.326347	-0.0113099	0	0	0
1155	457.069	3348.72	0.215113	0.944011	0.859877	-0.423152	-0.0214545	-0.0562799	0	0	0
1156	402.062	3139.17	0.674454	0.0655708	0.390491	-0.157502	0.74321	0.320294	0	0	0
1157	472.072	3114.3	0.785132	0.423452	0.912708	-0.0949472	0.298622	0.037792	0	0	0
1158	419.068	3064.08	0.678789	0.862258	0.957791	-0.254783	-0.0890708	0.0279858	0	0	0
1159	416.17	3083.88	0.961362	0.582172	0.949122	0.0195605	-0.228258	-0.0353128	0	0	0
1160	399.021	3046.02	0.102872	0.303478	0.870402	-0.338823	0.326253	0.0455514	0	0	0
1161	430.07	3003.15	0.231631	0.756844	0.448466	-0.77753	-0.195049	-0.445575	0	0	0
1162	429.072	2955.94	0.16219	0.674097	0.287484	-1.02651	-0.290802	-0.71958	0	0	0
1163	433.062	2950.12	0.652451	0.606134	0.890514	-0.171336	0.197312	-0.045638	0	0	0
1164	432.067	2930.95	0.278626	0.577208	0.626819	-0.535939	0.26984	-0.221667	0	0	0
1165	609.083	2885.92	0.812314	0.458972	0.843029	-0.110313	0.293048	-0.0801271	0	0	0
1166	629.275	2883	0.650245	0.236515	0.62659	-0.283687	-0.704904	-0.270228	0	0	0
1167	404.023	2799.32	0.973831	0.180108	0.260024	-0.0089764	0.469038	0.259631	0	0	0
1168	429.072	2815.66	0.1922	0.720576	0.419969	-0.927882	-0.225579	-0.507209	0	0	0
1169	437.152	2716.32	0.178029	0.165595	0.312474	-1.04706	-1.05925	-0.728941	0	0	0
1170	413.246	2687.56	0.362238	0.0644595	0.0792399	1.25877	1.46989	1.30694	0	0	0
1171	413.634	2675.55	0.980076	0.907406	0.856951	0.0160097	0.0660232	-0.118929	0	0	0
1172	430.071	2631.86	0.17144	0.732833	0.49466	-0.852352	-0.198604	-0.374667	0	0	0
1173	579.05	2618.49	0.578928	0.373976	0.599257	-0.296695	-0.471165	-0.25215	0	0	0
1174	648.975	2614.84	0.416149	0.824196	0.329759	-0.447644	-0.120919	-0.546999	0	0	0
1175	470.322	2518.19	0.517891	0.596902	0.420523	0.425008	-0.200255	-0.246161	0	0	0
1176	477.058	2506.62	0.499667	0.466932	0.451227	0.285849	0.264526	0.235654	0	0	0
1177	446.315	2542.28	0.0591373	0.443921	0.0644225	-0.514184	-0.164448	-0.468712	0	0	0
1178	444.099	2542.82	0.759722	0.304711	0.26563	-0.0662986	0.19852	0.244307	0	0	0
1179	432.063	2526.53	0.221443	0.827107	0.479372	-0.741798	-0.11585	-0.396909	0	0	0
1180	447.305	2472.65	0.160042	0.251899	0.387431	-1.17976	-0.871182	-0.684953	0	0	0
1181	400.011	2418.64	0.541157	0.0675609	0.199494	0.266765	0.744751	0.511244	0	0	0
1182	402.002	2403.44	0.561452	0.157254	0.435603	-0.142616	0.39361	0.180853	0	0	0
1183	644.102	2389.94	0.666669	0.743125	0.873306	-0.296536	-0.206203	-0.100391	0	0	0
1184	565.033	2322.58	0.596092	0.395038	0.837638	0.181148	0.332045	-0.0607332	0	0	0
1185	633.94	2328.01	0.548833	0.401017	0.650771	0.252819	0.325906	0.154022	0	0	0
1186	482.359	2297.1	0.437431	0.690593	0.346879	-0.593852	-0.270871	-0.742444	0	0	0
1187	523.149	2203.74	0.685253	0.348441	0.9756	0.0909518	0.211277	-0.0061241	0	0	0
1188	523.135	2171.69	0.232683	0.00780422	0.254702	0.252313	0.468119	0.21868	0	0	0
1189	589.279	2183.37	0.0625753	0.634152	0.341069	-0.217285	0.0768172	-0.148055	0	0	0
1190	461.26	2180.47	0.189191	0.764982	0.990147	-0.215744	0.0525754	-0.0026078	0	0	0
1191	631.295	2163.72	0.389546	0.271967	0.540982	-0.156243	0.207315	0.138899	0	0	0
1192	577.352	2159.53	0.952741	0.970662	0.64907	-0.0391371	-0.0219126	-0.318044	0	0	0
1193	538.264	2154.41	0.947995	0.21136	0.512498	0.0186591	0.234865	-0.14349	0	0	0
1194	472.26	2147.77	0.318027	0.16207	0.519354	-0.185982	0.255391	0.132358	0	0	0
1195	679.275	2143.13	0.276258	0.0375985	0.734497	0.400496	0.878511	0.083733	0	0	0
1196	634.306	2133.66	0.885964	0.296311	0.684415	-0.0254895	0.333602	-0.067476	0	0	0
1197	975.707	2065.78	0.54448	0.834416	0.803262	0.344284	0.118892	0.149376	0	0	0
1198	516.282	2098.67	0.863634	0.896496	0.381241	-0.0383754	0.0293721	-0.17897	0	0	0
1199	547.277	2095.67	0.0630356	0.786986	0.319912	-0.350146	-0.0518984	-0.177506	0	0	0
1200	633.826	2089.58	0.352017	0.223797	0.58134	0.248807	0.642435	-0.135333	0	0	0
1201	680.316	2063.1	0.0385991	0.260967	0.456102	0.987876	2.07333	0.238745	0	0	0
1202	665.304	2052.4	0.147169	0.453525	0.359495	-0.274151	-0.159581	-0.174779	0	0	0
1203	402.166	2012.66	0.360396	0.506026	0.798144	-0.442214	-0.290507	0.120613	0	0	0
1204	548.319	2020.95	0.216649	0.05719	0.324556	1.01802	1.74147	0.540748	0	0	0
1205	553.245	2012.49	0.986992	0.651181	0.894832	-0.00709588	0.15497	-0.0551779	0	0	0
1206	601.31	1995.25	0.450701	0.0398699	0.563548	0.214737	0.470201	0.104428	0	0	0
1207	720.332	1999.15	0.674257	0.31169	0.870871	0.127947	0.303531	-0.0373294	0	0	0
1208	532.268	1998.38	0.650678	0.0027635	0.27492	-0.0597318	0.398249	0.201023	0	0	0
1209	740.386	1998.09	0.712844	0.113841	0.980641	-0.0696004	0.668052	-0.00448986	0	0	0
1210	635.326	1979.66	0.253145	0.182663	0.494427	-0.137762	0.299209	0.118677	0	0	0
1211	450.205	1969.06	0.565476	0.460083	0.680552	-0.0866113	0.213369	-0.0670065	0	0	0
1212	591.308	1964.25	0.392668	0.213972	0.9972	-0.164456	0.315374	0.000833522	0	0	0
1213	514.251	1969.9	0.797716	0.862737	0.301319	0.0448523	0.0270789	-0.147334	0	0	0
1214	576.318	1958.12	0.126634	0.0374495	0.175493	0.585366	0.53872	0.179415	0	0	0
1215	635.329	1952.32	0.848962	0.577746	0.972701	-0.0462117	0.140261	0.00738774	0	0	0
1216	624.749	1948.48	0.578173	0.818995	0.447661	-0.250957	-0.0944138	-0.335586	0	0	0
1217	690.325	1924.92	0.988793	0.26924	0.664137	-0.00285559	0.218556	-0.0809581	0	0	0
1218	670.313	1915.39	0.823737	0.115771	0.805093	0.0299467	0.246984	-0.0451084	0	0	0
1219	552.782	1889.72	0.118018	0.880144	0.192623	-0.56699	-0.072475	-0.466798	0	0	0
1220	724.331	1894.97	0.886924	0.228732	0.206067	0.0323811	0.576716	-0.288396	0	0	0
1221	545.298	1893.85	0.451683	0.417196	0.262352	-0.192	-0.2078	-0.309437	0	0	0
1222	669.315	1903.5	0.861397	0.935633	0.377414	-0.0297202	0.016195	-0.15959	0	0	0
1223	460.225	1882.17	0.570381	0.760453	0.328242	0.101081	0.0533312	0.238859	0	0	0
1224	531.244	1861.75	0.222877	0.316706	0.949955	-0.142201	0.114121	-0.00777244	0	0	0
1225	739.351	1850.55	0.328863	0.832432	0.240293	-0.293215	-0.0623287	-0.394721	0	0	0
1226	569.266	1838.35	0.941357	0.317768	0.614924	0.0136315	0.177425	-0.0980259	0	0	0
1227	640.302	1839.56	0.550333	0.725889	0.647507	-0.149185	-0.0798362	0.123107	0	0	0
1228	634.802	1818	0.968726	0.665752	0.519261	-0.0114228	0.246706	-0.171279	0	0	0
1229	574.272	1843.96	0.274113	0.514244	0.427268	-0.154686	-0.102407	-0.114963	0	0	0
1230	673.337	1818	0.108246	0.146792	0.630964	-0.355081	-0.283233	-0.0929004	0	0	0
1231	509.241	1790.2	0.166932	0.971003	0.266197	-0.288481	-0.0097082	-0.252257	0	0	0
1232	613.784	1776.2	0.227038	0.536442	0.971431	0.462329	0.193774	-0.00863955	0	0	0
1233	573.744	1798.65	0.709059	0.739907	0.270083	0.118648	-0.121278	-0.360719	0	0	0
1234	1103.79	1671.59	0.947193	0.280697	0.951354	0.0465718	-0.873042	-0.0462397	0	0	0
1235	632.303	1723.48	0.542098	0.686072	0.447248	-0.200559	-0.135242	-0.258478	0	0	0
1236	656.306	1742.51	0.995047	0.692195	0.696181	0.000963665	-0.06424	-0.0661843	0	0	0
1237	721.334	1730.68	0.121387	0.181147	0.186884	-0.64093	-0.52712	-0.552749	0	0	0
1238	695.327	1733.18	0.461078	0.411973	0.0743912	0.174756	0.170457	0.332778	0	0	0
1239	656.302	1724.11	0.111259	0.203992	0.352106	-0.388831	-0.295172	-0.217618	0	0	0
1240	547.265	1693.37	0.15675	0.310761	0.294791	-0.976942	-0.62294	-0.694579	0	0	0
1241	522.244	1689.97	0.0288746	0.534296	0.925499	-0.299635	0.114717	-0.0117175	0	0	0
1242	664.312	1593.33	0.0969289	0.818274	0.779235	0.368182	0.0427786	0.0527418	0	0	0
1243	647.312	1608.52	0.213631	0.350947	0.485296	0.426511	0.164479	-0.118923	0	0	0
1244	534.246	1655.8	0.235648	0.945449	0.932436	-0.706017	-0.0441213	-0.0453508	0	0	0
1245	831.869	1663.33	0.661378	0.477897	0.528487	0.24766	0.353126	0.378568	0	0	0
1246	644.804	1630.38	0.228831	0.932044	0.522419	0.218786	0.0146267	0.108675	0	0	0
1247	635.785	1647.25	0.478754	0.609791	0.360747	0.179159	0.144822	0.227838	0	0	0
1248	619.295	1633.65	0.887378	0.599718	0.179088	0.0217297	-0.0668876	-0.16394	0	0	0
1249	640.803	1629.26	0.122273	0.859705	0.963571	0.556999	0.0548068	-0.014726	0	0	0
1250	619.298	1594.96	0.784423	0.439328	0.314308	-0.0584192	-0.156545	-0.238042	0	0	0
1251	525.738	1562.35	0.437962	0.778783	0.484057	-0.465578	-0.184223	-0.387167	0	0	0
1252	599.801	1530.64	0.53128	0.828013	0.797739	0.174331	-0.0737398	0.0710309	0	0	0
1253	559.757	1529.44	0.885584	0.217688	0.210965	0.123192	-0.827768	-0.891108	0	0	0
1254	729.359	1534.36	0.272475	0.815859	0.349866	0.530858	-0.0577958	0.256432	0	0	0
1255	588.283	1540.74	0.117945	0.244222	0.134243	-3.42156	-1.78353	-3.60791	0	0	0
1256	618.785	1486.98	0.10023	0.747569	0.825165	0.618173	-0.110183	0.0655078	0	0	0
1257	563.27	1495.13	0.840445	0.117139	0.536993	0.0312904	0.33294	0.0792871	0	0	0
1258	719.692	1506.15	0.364343	0.195785	0.172827	1.27115	-1.35986	-1.43886	0	0	0
1259	720.656	1504.88	0.277865	0.278575	0.290952	1.37305	-0.88899	-0.820343	0	0	0
1260	647.801	1494.45	0.535696	0.530469	0.363071	-0.233353	-0.257321	-0.375247	0	0	0
1261	579.28	1511.37	0.0627953	0.160876	0.0133655	-0.541238	-0.413974	-0.807162	0	0	0
1262	561.265	1468.95	0.0466306	0.193292	0.311832	-0.295462	-0.214315	-0.158994	0	0	0
1263	567.636	1430.01	0.113557	0.439769	0.184405	1.12493	-0.480099	-0.811305	0	0	0
1264	458.223	1482.37	0.0563482	0.297487	0.145474	-0.409678	-0.21311	-0.287058	0	0	0
1265	526.246	1471.87	0.746603	0.308955	0.170038	-0.0711919	-0.221804	-0.263507	0	0	0
1266	552.759	1459.84	0.0310202	0.528502	0.739699	0.731597	0.271867	0.101693	0	0	0
1267	689.318	1400.29	0.270967	0.500838	0.281938	0.524028	0.204297	0.277312	0	0	0
1268	647.303	1448.46	0.890399	0.717363	0.611761	-0.030925	-0.0771358	-0.124497	0	0	0
1269	527.278	1421.04	0.0104908	0.252432	0.212674	0.507543	0.195469	0.265324	0	0	0
1270	478.76	1410.03	0.651849	0.97948	0.706944	0.132583	-0.00998144	0.0989832	0	0	0
1271	566.274	1398.91	0.297012	0.276063	0.256812	-0.760694	-0.818361	-0.921695	0	0	0
1272	634.298	1409.44	0.0767346	0.167699	0.0951164	-4.70892	-2.18278	-4.54174	0	0	0
1273	461.238	1408.59	0.144684	0.574113	0.889359	-0.244656	-0.0898467	0.023471	0	0	0
1274	662.315	1367.77	0.606932	0.321548	0.352835	-0.249746	-0.513456	-0.499634	0	0	0
1275	547.263	1346.87	0.327059	0.204339	0.509451	-0.318119	-0.425181	-0.208978	0	0	0
1276	607.78	1361.78	0.200025	0.26249	0.266684	-0.894255	-0.781568	-0.782758	0	0	0
1277	744.354	1364.02	0.716906	0.647364	0.424652	-0.121711	-0.147065	-0.280266	0	0	0
1278	566.271	1331.54	0.596651	0.442325	0.338885	-0.113232	-0.183793	-0.228799	0	0	0
1279	668.304	1324.83	0.54725	0.186221	0.337839	-0.164212	-0.372375	-0.264182	0	0	0
1280	496.234	1315.2	0.816204	0.497263	0.957961	-0.0434136	-0.125868	-0.0102577	0	0	0
1281	524.249	1169.07	0.605031	0.464144	0.384717	0.235133	-0.275233	0.378153	0	0	0
1282	650.794	1314.81	0.154443	0.861805	0.451112	0.408055	0.0479331	0.179059	0	0	0
1283	555.256	1252.74	0.532849	0.987202	0.697171	0.11205	0.00343635	0.0565116	0	0	0
1284	550.269	1265.87	0.276687	0.426785	0.245194	-0.315841	-0.229587	-0.378582	0	0	0
1285	548.268	1269.28	0.602017	0.905361	0.905778	-0.0975334	-0.0217866	0.0254245	0	0	0
1286	657.818	1236.65	0.550515	0.16076	0.609618	0.334978	-0.649712	-0.250852	0	0	0
1287	602.279	1245.91	0.37865	0.624202	0.317829	0.149922	0.0738712	0.117711	0	0	0
1288	577.282	1228.28	0.0569547	0.800827	0.449093	0.521455	0.0814711	0.117365	0	0	0
1289	618.782	1254.73	0.0821367	0.786636	0.598533	0.429401	-0.0698165	0.106401	0	0	0
1290	644.324	1242.37	0.0483424	0.903556	0.727804	0.380775	-0.0145547	0.0577805	0	0	0
1291	588.288	1196.15	0.935164	0.286729	0.530022	0.0207691	-0.251966	-0.14079	0	0	0
1292	705.329	1243.16	0.669113	0.308806	0.34946	0.112128	-0.246915	0.235207	0	0	0
1293	687.327	1230.73	0.262314	0.593089	0.615787	0.388118	-0.140354	0.125774	0	0	0
1294	560.275	1201.17	0.88985	0.586447	0.838958	0.0246723	-0.113301	0.0357504	0	0	0
1295	536.272	1024.07	0.271936	0.261778	0.297376	-0.394656	-0.443936	-0.371013	0	0	0
1296	467.231	1199.18	0.230287	0.0523782	0.457419	-0.224555	-0.377288	-0.136757	0	0	0
1297	630.303	1200.84	0.622981	0.796755	0.815415	-0.0576544	-0.0353804	0.0363688	0	0	0
1298	459.234	1187.38	0.0460637	0.111156	0.00211722	-0.336676	-0.282668	-0.482461	0	0	0
1299	734.843	1185.49	0.811115	0.401781	0.770757	-0.103957	-0.429274	-0.127147	0	0	0
1300	488.741	1165.62	0.567694	0.652685	0.547354	0.18137	-0.151294	-0.203209	0	0	0
1301	521.755	1163.09	0.436581	0.997536	0.680167	0.507147	0.00154609	0.267546	0	0	0
1302	463.234	1128.88	0.492421	0.531402	0.693298	0.122195	-0.104304	-0.0677018	0	0	0
1303	638.298	1121.95	0.745223	0.802597	0.38257	-0.0658237	-0.0539268	-0.172548	0	0	0
1304	625.277	1078.94	0.99998	0.871163	0.811715	-4.08731e-06	-0.0308181	-0.0445781	0	0	0
1305	558.273	1084.74	0.659094	0.571813	0.994877	0.0661887	0.135293	-0.00126081	0	0	0
1306	541.265	1079.82	0.886373	0.415324	0.698303	-0.0254773	-0.145074	-0.0670857	0	0	0
1307	635.298	1078.13	0.788703	0.23211	0.672515	-0.0815349	-0.330238	-0.109268	0	0	0
1308	544.761	1047.9	0.0588726	0.756058	0.906506	0.420414	-0.0761467	-0.0263158	0	0	0
1309	621.285	1044.5	0.0816379	0.647459	0.550945	0.242607	0.0566223	0.0932977	0	0	0
1310	511.249	1026.47	0.876786	0.724492	0.598754	0.0236207	0.0713057	0.106292	0	0	0
1311	457.758	1036.57	0.0884302	0.043067	0.115372	0.407521	0.339963	0.329438	0	0	0
1312	677.318	981.966	0.347912	0.249802	0.387584	-0.435441	-0.516986	-0.378134	0	0	0
1313	491.231	1025.72	0.921888	0.408393	0.655257	0.0165271	-0.140082	-0.0836987	0	0	0
1314	492.878	1035.25	0.208379	0.369405	0.881772	0.523015	-0.410257	0.0773783	0	0	0
1315	558.273	998.177	0.989817	0.259642	0.277996	-0.00204408	-0.227038	-0.24038	0	0	0
1316	530.734	1000.62	0.232913	0.706623	0.889187	0.354546	-0.14433	-0.0462452	0	0	0
1317	563.285	978.326	0.224194	0.38613	0.150201	-0.308677	-0.224833	-0.392621	0	0	0
1318	437.236	985.25	0.896978	0.354099	0.463509	-0.0550331	-0.353587	0.248628	0	0	0
1319	486.243	934.778	0.0594988	0.997314	0.522317	-0.310619	-0.00100597	-0.142184	0	0	0
1320	435.219	939.775	0.939967	0.735221	0.936407	0.0143765	0.0675663	0.0153326	0	0	0
1321	523.576	884.2	0.698554	0.181328	0.429	0.170961	0.658453	0.652323	0	0	0
1322	455.222	900.955	0.787323	0.488078	0.976235	0.0589164	-0.13468	0.00641945	0	0	0
1323	588.751	859.397	0.330344	0.705618	0.577948	0.419652	0.138702	0.240717	0	0	0
1324	432.204	863.102	0.0927755	0.591592	0.44993	0.306848	0.11487	0.127584	0	0	0
1325	593.271	877.611	0.451721	0.713123	0.806019	0.16956	0.0804985	0.0621563	0	0	0
1326	474.729	848.476	0.576628	0.402194	0.453486	0.117063	0.209839	0.199963	0	0	0
1327	398.695	842.578	0.578118	0.109849	0.302226	0.29209	0.926976	0.383459	0	0	0
1328	450.217	855.094	0.835856	0.564396	0.784789	-0.0411161	0.126821	0.0612594	0	0	0
1329	495.739	863.29	0.43207	0.72822	0.897696	0.16967	0.0869449	0.0321186	0	0	0
1330	535.741	830.164	0.384435	0.420966	0.63891	-0.706646	-0.595228	-0.374947	0	0	0
1331	585.278	829.178	0.253692	0.1802	0.0488839	0.295484	0.448609	0.625799	0	0	0
1332	496.326	3168.52	0.19083	0.139853	0.177139	1.04335	0.67566	0.646486	0	0	0
1333	405.021	3023.12	0.768305	0.181341	0.196548	0.0988114	0.60896	0.645603	0	0	0
1334	609.11	2946.98	0.734821	0.282158	0.637785	0.132835	0.47341	0.204968	0	0	0
1335	417.037	2900.56	0.380567	0.458518	0.911583	-0.304292	0.251067	0.0464431	0	0	0
1336	416.024	2896.45	0.585446	0.172727	0.188233	0.173192	0.711548	0.569314	0	0	0
1337	448.098	2765.5	0.323277	0.151914	0.591662	-0.40809	0.577562	0.214963	0	0	0
1338	401.179	2749.33	0.384538	0.755541	0.707555	-0.437967	-0.149093	-0.187262	0	0	0
1339	419.187	2681.44	0.790691	0.0908873	0.503523	0.094957	1.01884	0.25019	0	0	0
1340	445.104	2524.5	0.222806	0.978204	0.478353	-0.858452	-0.0170727	-0.443023	0	0	0
1341	431.069	2471.52	0.180655	0.968235	0.533099	-0.836975	-0.0212872	-0.334539	0	0	0
1342	549.983	2159.79	0.174956	0.00731667	0.0228681	0.572032	0.932368	0.618003	0	0	0
1343	443.089	2131.73	0.20395	0.203963	0.384725	-0.324945	0.500097	0.26844	0	0	0
1344	437.044	1927.2	0.467858	0.309599	0.185001	-0.301002	0.628187	0.837046	0	0	0
1345	447.105	1885.2	0.198298	0.545718	0.439516	-0.658983	-0.31029	-0.358555	0	0	0
1346	446.106	1756.59	0.188709	0.616572	0.424972	-0.731349	-0.27389	-0.410333	0	0	0
1347	437.049	1742.58	0.299818	0.912218	0.48891	-0.607615	-0.0581127	-0.362357	0	0	0
1348	570.25	1681.84	0.704694	0.546803	0.576282	-0.148333	0.21965	-0.251409	0	0	0
1349	455.242	1596.93	0.190968	0.314647	0.549119	-0.223394	0.727073	-0.107961	0	0	0
1350	525.256	1598.31	0.120724	0.0958743	0.194551	1.00295	0.985584	0.650597	0	0	0
1351	528.26	1589.99	0.938677	0.734795	0.665615	-0.0144877	0.0623024	-0.0804324	0	0	0
1352	604.297	1252.04	0.757435	0.401134	0.687104	0.0939582	-0.275217	0.12465	0	0	0
1353	572.286	1110.99	0.437637	0.672018	0.266511	-0.16677	-0.0736602	-0.175951	0	0	0
1354	401.259	1084.43	0.27154	0.323509	0.403357	0.26683	0.178617	0.299196	0	0	0
1355	480.249	976.282	0.386692	0.996579	0.767248	-0.280459	-0.00133372	-0.093709	0	0	0
1356	610.767	953.45	0.490472	0.941007	0.914963	0.417893	-0.0426651	-0.0714245	0	0	0
1357	532.245	888.374	0.503288	0.423068	0.520041	-0.312741	-0.33512	-0.338801	0	0	0
1358	398.706	871.379	0.940216	0.774553	0.693753	-0.0295431	0.107089	0.185788	0	0	0
1359	551.267	864.805	0.75529	0.0587383	0.822401	-0.0655162	0.393705	0.051278	0	0	0
1360	437.149	2938.65	0.884652	0.540688	0.127902	0.0948479	0.37366	2.02767	0	0	0
1361	459.293	2728.28	0.255632	0.834356	0.441004	-0.386518	-0.0534919	-0.260777	0	0	0
1362	430.072	2430	0.211257	0.569714	0.402855	-0.890855	-0.35649	-0.546788	0	0	0
1363	428.294	2391.78	0.574748	0.242353	0.313309	-0.545118	-1.03619	-0.888166	0	0	0
1364	432.313	2409.63	0.178619	0.168716	0.142746	-0.940502	-0.890495	-1.06087	0	0	0
1365	722.368	2234.85	0.630622	0.498019	0.666877	0.176481	0.274752	-0.152714	0	0	0
1366	439.054	2221.76	0.375328	0.140939	0.335159	-0.489434	0.791527	0.434341	0	0	0
1367	463.22	2219.38	0.803506	0.647612	0.29623	-0.110204	-0.133137	-0.363665	0	0	0
1368	1019.48	2080.74	0.275759	0.946372	0.31668	-0.951849	-0.0590721	-0.911879	0	0	0
1369	633.323	2078.17	0.87991	0.380954	0.962852	0.0324292	0.211321	-0.0101948	0	0	0
1370	446.103	2021.31	0.219566	0.583897	0.441784	-0.716725	-0.308354	-0.415296	0	0	0
1371	626.303	1973.4	0.491321	0.30245	0.129944	-0.107319	0.262396	-0.19144	0	0	0
1372	594.239	1906.19	0.663314	0.730031	0.475419	-0.222836	0.236987	-0.441151	0	0	0
1373	776.366	1906.86	0.625743	0.875546	0.782351	0.174966	0.0581049	-0.111341	0	0	0
1374	570.285	1913.5	0.765229	0.452399	0.80409	-0.0834402	0.214663	0.0620388	0	0	0
1375	955.534	1898.23	0.198495	0.262107	0.95236	1.08527	0.593039	0.0344259	0	0	0
1376	562.284	1855.54	0.3935	0.337514	0.469265	-0.184478	0.16767	0.165271	0	0	0
1377	590.281	1860.88	0.632291	0.802223	0.692455	-0.0793706	-0.0527564	-0.0746564	0	0	0
1378	803.371	1811.38	0.0547165	0.206199	0.0548771	-0.613955	-0.362878	-0.663217	0	0	0
1379	495.256	1828.92	0.262188	0.673028	0.80694	-0.278183	0.122008	-0.0615831	0	0	0
1380	714.319	1816.45	0.280186	0.865137	0.87032	-0.37306	0.0536395	-0.0553333	0	0	0
1381	585.291	1817.72	0.72348	0.757327	0.494937	-0.16419	-0.113804	-0.286536	0	0	0
1382	669.311	1812.9	0.194904	0.23122	0.150339	-0.298783	-0.282152	-0.379263	0	0	0
1383	443.237	1789.46	0.652635	0.652713	0.572527	-0.171299	-0.150477	-0.223734	0	0	0
1384	580.289	1798.19	0.625035	0.467488	0.0820117	0.0870511	0.188937	0.458148	0	0	0
1385	450.224	1762.15	0.69844	0.924325	0.844442	0.102444	-0.0211681	0.0500168	0	0	0
1386	501.254	1745.57	0.470786	0.533182	0.875782	0.332419	0.223026	-0.0592607	0	0	0
1387	603.288	1732.16	0.170267	0.777482	0.716261	0.737453	0.113671	-0.147006	0	0	0
1388	430.234	1748.04	0.477903	0.813907	0.865582	-0.243245	0.0662469	-0.060323	0	0	0
1389	999.446	1685.42	0.570464	0.145615	0.942389	0.382043	0.911068	-0.0534933	0	0	0
1390	504.258	1735.57	0.896624	0.811826	0.591501	-0.0355895	0.0572354	0.150875	0	0	0
1391	792.377	1703.91	0.861946	0.345048	0.735859	-0.039895	-0.219672	-0.103483	0	0	0
1392	867.374	1707.7	0.750036	0.522701	0.676818	-0.200543	-0.372267	-0.260593	0	0	0
1393	831.386	1706.08	0.460602	0.246916	0.932626	0.296643	0.600615	-0.0294697	0	0	0
1394	537.261	1670.62	0.956021	0.722004	0.937984	0.0161385	-0.103987	-0.0262973	0	0	0
1395	617.297	1690.89	0.420438	0.824986	0.519336	-0.272685	-0.0740949	-0.238248	0	0	0
1396	536.273	1626.06	0.714206	0.648665	0.680326	-0.0856867	0.128451	-0.127098	0	0	0
1397	545.275	1620.76	0.666982	0.47853	0.576337	0.194915	-0.274987	-0.228662	0	0	0
1398	819.378	1632.73	0.773174	0.636464	0.882795	-0.122676	-0.190336	-0.0714509	0	0	0
1399	699.36	1633.92	0.31642	0.746591	0.861925	0.251983	-0.0659926	-0.0426994	0	0	0
1400	621.295	1632.08	0.983299	0.88906	0.855273	0.00401567	-0.0275553	0.0408068	0	0	0
1401	672.352	1574.33	0.223949	0.609689	0.308184	-0.200862	0.108625	0.203083	0	0	0
1402	538.254	1612.94	0.976584	0.435269	0.719456	-0.00553278	-0.156095	-0.0735773	0	0	0
1403	629.301	1575.3	0.723825	0.971848	0.826366	0.0851351	0.00885537	0.0569039	0	0	0
1404	596.775	1574.07	0.576738	0.371584	0.612216	0.187456	0.420703	-0.190741	0	0	0
1405	571.774	1566.14	0.373102	0.971612	0.852297	0.349284	-0.0137368	-0.0746949	0	0	0
1406	430.224	1565.3	0.0228836	0.244937	0.0616534	-0.700689	-0.400442	-0.572236	0	0	0
1407	594.803	1565.03	0.653513	0.598453	0.526338	0.185383	-0.217877	-0.271817	0	0	0
1408	462.233	1528.41	0.122883	0.0565699	0.106122	-0.362495	-0.454535	-0.402615	0	0	0
1409	595.779	1540.58	0.15396	0.323357	0.643398	0.608174	0.431845	0.163175	0	0	0
1410	926.447	1528.71	0.116287	0.38596	0.132423	0.756258	0.480321	0.676879	0	0	0
1411	580.28	1520.85	0.265582	0.272459	0.00414938	-0.17132	-0.275446	-0.567059	0	0	0
1412	416.227	1530.21	0.354817	0.586372	0.557441	-0.200544	0.119961	0.134884	0	0	0
1413	483.745	1517.46	0.572043	0.723527	0.819703	0.273507	-0.1465	-0.105853	0	0	0
1414	500.244	1524.54	0.376698	0.440857	0.52558	0.304263	-0.202388	-0.180681	0	0	0
1415	436.245	1457.53	0.904055	0.930882	0.514927	-0.0443214	0.0303873	0.249397	0	0	0
1416	591.278	1504.33	0.279595	0.341265	0.296434	-2.76124	-2.04369	-2.95147	0	0	0
1417	516.757	1498.51	0.79355	0.387464	0.581188	-0.11133	-0.389431	-0.275911	0	0	0
1418	671.315	1513.68	0.581141	0.562862	0.507478	-0.14244	0.182646	-0.183568	0	0	0
1419	604.3	1488.29	0.119137	0.22083	0.263165	0.316722	0.367796	0.225914	0	0	0
1420	645.306	1464.18	0.991165	0.233131	0.231985	-0.00288604	-0.341705	-0.325389	0	0	0
1421	477.775	1472.05	0.627651	0.849047	0.716634	0.330165	-0.129355	-0.280114	0	0	0
1422	693.818	1467.49	0.140586	0.480879	0.499542	0.543473	-0.266458	-0.185823	0	0	0
1423	594.298	1454.55	0.536285	0.139746	0.190002	-0.160157	-0.386234	-0.331177	0	0	0
1424	590.281	1433.95	0.511206	0.258137	0.211192	-0.0932135	-0.218094	-0.235979	0	0	0
1425	594.796	1438.88	0.845404	0.12721	0.185425	-0.0617487	-0.434889	-0.381177	0	0	0
1426	619.297	1434.33	0.486573	0.0834837	0.33295	0.108871	-0.259406	-0.144708	0	0	0
1427	561.271	1434.11	0.253694	0.506428	0.529112	-0.196243	-0.13845	-0.135128	0	0	0
1428	479.243	1411.41	0.50675	0.913739	0.967621	-0.158291	0.0205691	-0.00907033	0	0	0
1429	644.309	1391.77	0.107491	0.185337	0.198362	-1.004	-0.767119	-0.790631	0	0	0
1430	480.236	1385.5	0.6524	0.595457	0.594394	-0.0873852	0.115296	0.130398	0	0	0
1431	479.727	1402.6	0.843678	0.958984	0.938958	-0.0745566	0.0185147	0.0247369	0	0	0
1432	565.284	1342.76	0.507726	0.0977765	0.150268	-0.17298	-0.413333	-0.374389	0	0	0
1433	583.277	1349.42	0.673085	0.247614	0.129956	-0.126807	-0.286911	-0.396417	0	0	0
1434	431.216	1307.86	0.187405	0.215501	0.182735	-0.231391	-0.220379	-0.235864	0	0	0
1435	752.346	1273.19	0.978582	0.21805	0.607587	-0.0104737	-0.466304	-0.192391	0	0	0
1436	481.227	1241.68	0.236894	0.282576	0.26127	-1.50008	-1.29733	-1.50997	0	0	0
1437	475.219	1259.19	0.343426	0.343676	0.0837563	0.199792	0.143671	0.30056	0	0	0
1438	436.742	1183.55	0.763895	0.34361	0.334305	-0.106514	0.334751	0.343687	0	0	0
1439	460.229	1157.82	0.25827	0.175782	0.395257	-0.851757	-1.07658	-0.652759	0	0	0
1440	503.246	1163.44	0.528027	0.246655	0.384299	-0.134965	-0.272919	-0.220551	0	0	0
1441	535.262	1143	0.786957	0.966199	0.848853	-0.0645748	0.00973277	-0.0478217	0	0	0
1442	502.242	1138.91	0.524663	0.476929	0.249828	-0.133523	-0.164419	-0.249594	0	0	0
1443	435.23	1112.89	0.0637491	0.169503	0.269682	-2.80394	-1.63323	-1.21439	0	0	0
1444	595.282	1122.27	0.681162	0.360518	0.788787	-0.0960081	-0.213811	-0.061558	0	0	0
1445	658.321	1127.61	0.542876	0.152391	0.283356	-0.265065	-0.47363	-0.3708	0	0	0
1446	650.297	1137.52	0.236457	0.551833	0.831216	0.322538	0.295666	0.0569249	0	0	0
1447	393.204	1089.3	0.135751	0.225924	0.209976	-1.08938	-0.817987	-0.909589	0	0	0
1448	549.262	1093.14	0.647058	0.888141	0.308683	0.0854479	0.0359664	0.241361	0	0	0
1449	720.335	1080.88	0.190723	0.239982	0.206602	-2.89291	-2.22205	-3.09467	0	0	0
1450	526.247	967.777	0.576483	0.405624	0.675729	0.183466	0.275594	0.134737	0	0	0
1451	445.199	987.865	0.0173265	0.122146	0.105126	-0.720466	-0.493941	-0.475493	0	0	0
1452	443.233	991.778	0.123334	0.537645	0.212188	-1.90773	-0.683849	-1.46003	0	0	0
1453	506.238	925.818	0.453093	0.958539	0.560384	0.314104	0.0189555	-0.256765	0	0	0
1454	490.235	934.294	0.608933	0.960661	0.376931	0.152153	0.0121608	-0.265429	0	0	0
1455	418.214	952.672	0.30641	0.766455	0.421698	-0.310959	-0.126491	-0.257324	0	0	0
1456	520.755	917.972	0.433087	0.252904	0.650505	-0.80403	-1.35522	-0.481001	0	0	0
1457	431.22	929.76	0.438293	0.188155	0.229366	-0.181613	-0.279432	-0.297256	0	0	0
1458	451.23	890.561	0.870537	0.24471	0.310499	-0.0287798	-0.243526	-0.163909	0	0	0
1459	574.265	898.378	0.307208	0.523637	0.975352	-0.407416	-0.241668	0.0147045	0	0	0
1460	528.259	863.537	0.239543	0.504094	0.330072	-0.37831	-0.208239	-0.324953	0	0	0
1461	471.241	880.729	0.144749	0.730332	0.0438607	-0.310576	-0.0662171	-0.434551	0	0	0
1462	462.225	872.957	0.436719	0.68868	0.37395	0.371361	-0.0658164	-0.163517	0	0	0
1463	480.25	857.511	0.530764	0.621554	0.438467	-0.321145	-0.259552	-0.435083	0	0	0
1464	492.232	833.624	0.270609	0.154189	0.263606	0.176626	0.310939	0.224768	0	0	0
1465	459.063	3561.42	0.591582	0.333754	0.714792	-0.144141	0.251878	0.104951	0	0	0
1466	415.034	3512.19	0.992503	0.0203592	0.125572	0.00243651	0.692193	0.492789	0	0	0
1467	457.028	3476.74	0.601067	0.0785287	0.130361	-0.129625	0.49042	0.417685	0	0	0
1468	389.012	3379.7	0.447888	0.00384688	0.106138	0.146707	0.827916	0.500746	0	0	0
1469	383.032	3369.44	0.495644	0.0777392	0.877686	-0.215848	0.632052	0.0524085	0	0	0
1470	405.021	3242.63	0.810857	0.0178799	0.0649259	-0.0589676	0.822229	0.63472	0	0	0
1471	389.01	3137.97	0.927368	0.0192702	0.185867	-0.0267555	0.88992	0.453482	0	0	0
1472	585.302	3071.21	0.128904	0.230989	0.192931	1.44581	0.610486	1.04082	0	0	0
1473	401.113	3051.09	0.705014	0.621338	0.487839	-0.243213	-0.297827	-0.427828	0	0	0
1474	412.283	2915.72	0.860201	0.920887	0.238531	-0.0792361	-0.0407121	-0.534398	0	0	0
1475	404.172	2872.82	0.811651	0.0965556	0.201004	0.0578837	0.435942	0.333733	0	0	0
1476	385.051	2861.07	0.273908	0.700926	0.877059	-0.746604	0.194846	-0.0905476	0	0	0
1477	464.277	2806.75	0.652307	0.0768325	0.0771729	-0.132331	0.613695	0.387176	0	0	0
1478	405.03	2798	0.919885	0.123513	0.180906	-0.0361705	0.637463	0.393044	0	0	0
1479	385.05	2790.86	0.776592	0.427725	0.646778	-0.115994	0.303046	-0.146713	0	0	0
1480	394.158	2759.96	0.807467	0.0986238	0.465668	0.0865904	1.89769	0.225288	0	0	0
1481	486.308	2702.5	0.960804	0.063371	0.793818	-0.0118168	0.563642	-0.0670077	0	0	0
1482	412.286	2655.12	0.0258725	0.10837	0.0438504	-0.999246	-0.655764	-0.936905	0	0	0
1483	384.073	2682.62	0.646491	0.277779	0.719361	-0.186029	0.629246	0.156018	0	0	0
1484	412.283	2623.86	0.0741963	0.309162	0.12128	-0.826821	-0.410689	-0.711368	0	0	0
1485	414.593	2638.67	0.601972	0.112186	0.471772	0.179874	0.553549	0.201529	0	0	0
1486	403.228	2613.63	0.663494	0.258494	0.908031	-0.0807672	0.35501	-0.0209979	0	0	0
1487	597.089	2631.16	0.865944	0.896024	0.973755	0.104683	-0.0799529	-0.0190249	0	0	0
1488	459.075	2546.5	0.605546	0.025597	0.0702963	0.131448	0.808119	0.637125	0	0	0
1489	400.247	2492.09	0.744701	0.0240233	0.150004	0.0606439	0.650129	0.267077	0	0	0
1490	476.061	2455.24	0.359705	0.0634373	0.0364921	-0.261527	0.793022	0.778385	0	0	0
1491	444.347	2399.51	0.0955807	0.831294	0.0852365	-0.592315	0.0945956	-0.491303	0	0	0
1492	602.936	2377.01	0.213042	0.0567111	0.173925	0.757028	1.25659	0.555441	0	0	0
1493	565.03	2381.27	0.309356	0.0364651	0.081916	0.334704	0.906144	0.581171	0	0	0
1494	592.316	2366.4	0.918637	0.0314301	0.125076	-0.0154286	0.819882	0.29471	0	0	0
1495	409.117	2225.68	0.127441	0.972976	0.479179	-0.345904	-0.00765285	0.138452	0	0	0
1496	432.074	2224.4	0.295633	0.472488	0.531416	-0.519182	-0.335726	-0.275871	0	0	0
1497	545.112	2198.76	0.00947469	0.00209245	0.0120321	0.603824	0.954451	0.70144	0	0	0
1498	424.096	2191.99	0.764217	0.162709	0.510618	-0.0871755	0.411998	0.1477	0	0	0
1499	575.247	2172.79	0.0656965	0.0728842	0.134389	0.759837	0.715558	0.589616	0	0	0
1500	549.014	2154.9	0.177429	0.0262615	0.0758745	0.50349	0.861124	0.525264	0	0	0
1501	576.325	2156.88	0.284766	0.0173408	0.0432161	0.671571	0.60196	0.451538	0	0	0
1502	548.333	2159.13	0.765579	0.0166323	0.396461	-0.0341518	0.636512	0.125557	0	0	0
1503	720.35	2132.13	0.141531	0.0296044	0.0546388	0.29319	0.735411	0.306587	0	0	0
1504	619.333	2100.98	0.878581	0.752562	0.312581	0.0614442	-0.113896	-0.397419	0	0	0
1505	600.281	2095.61	0.0712131	0.00185469	0.0569938	0.465536	0.753403	0.270118	0	0	0
1506	473.253	2087.25	0.186768	0.466375	0.719982	-0.250675	0.11952	-0.0690687	0	0	0
1507	617.314	2090.57	0.787785	0.538365	0.707632	-0.081145	0.149863	-0.0960689	0	0	0
1508	617.304	2067.74	0.0989199	0.0161035	0.213224	0.394183	0.798384	0.20601	0	0	0
1509	583.326	2051.55	0.0667078	0.536	0.183832	-0.36341	-0.131502	-0.293963	0	0	0
1510	567.075	2060.58	0.206346	0.7174	0.393216	-1.20914	-0.289015	-0.757001	0	0	0
1511	646.33	2028.59	0.726483	0.0594045	0.754711	-0.0463472	0.389413	0.0479125	0	0	0
1512	513.257	2022.26	0.038615	0.00759663	0.240473	0.645952	0.568357	0.182503	0	0	0
1513	573.271	2031.06	0.570844	0.286489	0.622487	0.10166	0.235231	-0.0955686	0	0	0
1514	440.058	1993.98	0.136854	0.877761	0.760546	-0.497062	0.0543284	-0.0896107	0	0	0
1515	673.343	1986.16	0.332464	0.0573317	0.234216	0.213542	0.317807	0.154376	0	0	0
1516	738.351	1982.91	0.172256	0.0604314	0.623498	0.33442	0.629119	0.112093	0	0	0
1517	716.36	1937.28	0.0767542	0.0978012	0.0911066	0.501853	1.46252	0.706214	0	0	0
1518	489.247	1947.68	0.114407	0.0678215	0.0569592	0.69236	0.715226	0.533563	0	0	0
1519	442.219	1943.13	0.700416	0.127162	0.200421	0.0858586	0.268548	0.351429	0	0	0
1520	448.108	1942.79	0.275695	0.675257	0.698247	-0.576108	-0.219927	-0.192159	0	0	0
1521	534.264	1938.84	0.784849	0.996869	0.664869	0.050118	-0.0007934	0.0823602	0	0	0
1522	712.338	1900.1	0.510725	0.41364	0.427073	-0.142122	0.13658	0.151812	0	0	0
1523	693.349	1901.78	0.039941	0.0338291	0.120346	0.551513	0.499405	0.285334	0	0	0
1524	563.285	1900.82	0.311638	0.992031	0.350001	0.362151	-0.003632	0.375847	0	0	0
1525	607.293	1891.53	0.876604	0.405384	0.711642	0.0297784	0.154558	-0.0769797	0	0	0
1526	686.369	1846.09	0.574288	0.978384	0.531592	-0.32708	0.0156518	-0.374348	0	0	0
1527	679.307	1805.62	0.144166	0.0954992	0.16447	-0.950412	-1.1764	-0.964729	0	0	0
1528	576.283	1786.81	0.725902	0.231044	0.202361	0.0595227	0.200338	0.321452	0	0	0
1529	655.8	1791.36	0.70888	0.988977	0.523927	0.139251	-0.0048601	-0.221987	0	0	0
1530	474.242	1765.22	0.147178	0.536257	0.511476	-0.50469	-0.197976	-0.226243	0	0	0
1531	691.341	1762.84	0.579547	0.361039	0.492958	-0.306147	-0.478501	-0.374032	0	0	0
1532	573.281	1767.33	0.362018	0.841515	0.581632	-0.11543	-0.0255881	-0.0894478	0	0	0
1533	499.239	1756.42	0.95776	0.882161	0.669587	0.0107402	0.0293534	-0.103995	0	0	0
1534	588.786	1725.38	0.991592	0.762443	0.806731	-0.00395761	0.148812	-0.0879888	0	0	0
1535	571.291	1722.94	0.09874	0.796719	0.776917	-0.315063	0.0439094	-0.0620006	0	0	0
1536	737.346	1721.17	0.488893	0.0122386	0.0823439	0.137923	0.600978	0.410478	0	0	0
1537	503.271	1715.29	0.28422	0.437025	0.947901	-0.473463	0.26789	0.0277316	0	0	0
1538	763.384	1703.79	0.961101	0.955491	0.442899	0.00960902	0.0106793	0.145695	0	0	0
1539	551.211	1681.21	0.528323	0.624751	0.781045	0.353491	0.247525	0.159121	0	0	0
1540	632.309	1697.29	0.656812	0.170771	0.862592	0.105187	0.37473	-0.0417569	0	0	0
1541	600.805	1684.97	0.999616	0.904678	0.826742	0.000332758	0.0853665	-0.182537	0	0	0
1542	688.326	1686.13	0.263271	0.30219	0.280051	-0.232617	0.168388	-0.171758	0	0	0
1543	546.266	1685.53	0.911588	0.17279	0.632881	-0.0317582	-0.320832	-0.121135	0	0	0
1544	699.348	1690.94	0.529582	0.67007	0.729927	-0.13998	0.0922899	-0.0790417	0	0	0
1545	458.221	1655.79	0.856669	0.769855	0.859247	0.0517589	0.0839695	0.0574993	0	0	0
1546	660.303	1660.59	0.233425	0.519972	0.519527	0.312461	0.142795	0.144734	0	0	0
1547	639.295	1629.29	0.99914	0.0070879	0.0557035	-9.87905e-05	0.555827	0.337933	0	0	0
1548	605.31	1610.51	0.759069	0.630809	0.190075	0.087268	-0.14569	-0.396436	0	0	0
1549	531.245	1618.43	0.320698	0.477751	0.342088	-1.41188	-0.875222	-1.43729	0	0	0
1550	629.296	1606.59	0.617396	0.144781	0.521644	0.0920896	0.227346	-0.118498	0	0	0
1551	576.282	1625.53	0.222959	0.710098	0.312601	-0.258627	0.0968078	-0.230794	0	0	0
1552	422.237	1600.3	0.71275	0.0569424	0.260864	0.0953901	0.694852	0.387471	0	0	0
1553	401.227	1604.47	0.219223	0.334743	0.329026	-0.621021	-0.44108	-0.481871	0	0	0
1554	713.354	1588.74	0.028233	0.0125302	0.174144	0.318977	0.520819	0.244151	0	0	0
1555	609.322	1584.78	0.63034	0.00503746	0.0929677	0.126905	0.985597	0.725831	0	0	0
1556	592.313	1603.22	0.30794	0.571517	0.308359	-0.330705	0.221325	-0.390178	0	0	0
1557	577.266	1579.87	0.946077	0.730539	0.850757	-0.026234	-0.130068	-0.0762097	0	0	0
1558	691.336	1589.99	0.12774	0.507881	0.13315	-0.738608	-0.340166	-0.774404	0	0	0
1559	650.312	1577.09	0.179357	0.30683	0.01698	-0.247442	-0.231842	-0.51142	0	0	0
1560	538.257	1539.48	0.52558	0.886256	0.606477	0.0833807	0.0211298	0.0583998	0	0	0
1561	505.251	1541.85	0.2788	0.682497	0.331224	-0.711455	-0.251145	-0.668016	0	0	0
1562	544.266	1544.1	0.583252	0.474979	0.191568	-0.114472	-0.166767	-0.310268	0	0	0
1563	702.823	1526.77	0.106312	0.29253	0.202389	1.41294	1.03677	0.767391	0	0	0
1564	415.239	1534.43	0.270397	0.474006	0.682326	-0.354409	0.22957	-0.132679	0	0	0
1565	435.242	1197.97	0.153186	0.137301	0.235141	0.603112	0.556248	0.523547	0	0	0
1566	549.259	1507.28	0.894426	0.428413	0.992807	-0.0315747	0.184936	0.00222441	0	0	0
1567	583.274	1485.25	0.0435277	0.151822	0.126612	0.579018	0.457173	0.570848	0	0	0
1568	478.275	1466.63	0.142103	0.99483	0.559395	0.727684	0.00314189	0.313026	0	0	0
1569	590.28	1471.65	0.0535663	0.225155	0.0759233	-0.512325	-0.30853	-0.470645	0	0	0
1570	462.222	1421.86	0.316345	0.5328	0.916415	-0.295802	0.199613	-0.0324324	0	0	0
1571	501.254	1434.95	0.202617	0.104594	0.499698	0.385659	-0.367052	-0.17671	0	0	0
1572	472.262	1196.2	0.381092	0.182601	0.099611	0.285176	0.490277	0.655961	0	0	0
1573	441.24	1431.16	0.66014	0.774317	0.757699	-0.137086	-0.0918753	0.0949514	0	0	0
1574	548.297	1434.56	0.314993	0.398293	0.345291	-1.92256	-1.38641	-1.89772	0	0	0
1575	463.224	1437.4	0.342937	0.502381	0.473053	0.190074	0.136171	0.208654	0	0	0
1576	538.252	1431	0.658713	0.747122	0.459789	0.0579902	0.0773588	0.109251	0	0	0
1577	490.251	1407.59	0.368668	0.001191	0.0317048	0.165448	0.907897	0.550787	0	0	0
1578	625.273	1408.98	0.262857	0.42166	0.0845381	0.405063	0.277901	0.391258	0	0	0
1579	561.273	1406.16	0.271086	0.966151	0.57509	-0.297986	-0.0107741	-0.159853	0	0	0
1580	630.308	1416.93	0.533999	0.586313	0.213011	-0.0959934	-0.0931539	-0.197717	0	0	0
1581	755.418	1385.97	0.867319	0.246349	0.198425	0.0612666	0.501441	0.470241	0	0	0
1582	463.223	1370.21	0.253654	0.188514	0.451634	0.187323	0.298308	0.129314	0	0	0
1583	527.261	1346.11	0.618505	0.35302	0.747288	0.121903	0.251081	0.11025	0	0	0
1584	508.255	1361.41	0.796469	0.282175	0.874463	-0.063298	0.360076	0.039299	0	0	0
1585	433.239	1346.55	0.750157	0.93984	0.92624	-0.112956	0.0278353	0.0401817	0	0	0
1586	504.285	1334.27	0.295777	0.383149	0.361867	-2.54924	-1.69321	-2.0777	0	0	0
1587	598.302	1298.91	0.98661	0.202736	0.26228	-0.00688696	-0.559139	-0.507521	0	0	0
1588	418.2	1298.41	0.345167	0.297547	0.91669	-0.280969	0.352118	0.0315022	0	0	0
1589	400.203	1322.81	0.184351	0.52871	0.333621	-0.255896	-0.138747	-0.152411	0	0	0
1590	577.297	1297.94	0.409552	0.258842	0.792472	-0.193428	-0.234707	-0.0514816	0	0	0
1591	492.263	1278.65	0.501085	0.97515	0.743056	-0.115848	-0.00485325	-0.0576076	0	0	0
1592	476.248	1205.43	0.590578	0.504673	0.906274	-0.263631	-0.302431	-0.0612158	0	0	0
1593	416.229	1249.14	0.496235	0.288155	0.828152	-0.266655	0.629169	-0.0897946	0	0	0
1594	690.351	1284.43	0.318179	0.342103	0.562649	-0.713301	-0.660377	-0.413345	0	0	0
1595	479.246	1305.11	0.972531	0.984448	0.816533	0.00821383	0.00333735	0.0535634	0	0	0
1596	457.227	1266.49	0.879779	0.789811	0.971189	0.0574131	-0.0843637	0.0137622	0	0	0
1597	604.306	1200.52	0.937759	0.78717	0.773622	-0.0394052	-0.137792	0.151066	0	0	0
1598	572.292	1294.34	0.118202	0.16318	0.417217	-0.412603	-0.374761	-0.200686	0	0	0
1599	523.753	1277.38	0.559745	0.102696	0.283952	0.137795	0.360382	0.257854	0	0	0
1600	444.719	1290.06	0.689755	0.852978	0.673747	-0.192255	0.0772324	0.188185	0	0	0
1601	723.339	1202.84	0.571448	0.818492	0.499517	-0.383063	0.128116	-0.466851	0	0	0
1602	408.207	1275.57	0.068747	0.00347302	0.0154117	0.684077	0.62969	0.598746	0	0	0
1603	607.297	1268.36	0.485336	0.527063	0.596217	0.147886	-0.124138	0.10828	0	0	0
1604	480.232	1214.26	0.918469	0.923932	0.620783	0.037469	-0.0315932	-0.180592	0	0	0
1605	561.268	1254.63	0.0476231	0.587472	0.0292236	-0.344638	-0.100031	-0.338551	0	0	0
1606	539.253	1240.4	0.587035	0.390009	0.865003	0.10562	0.203065	0.0320255	0	0	0
1607	517.254	1197.38	0.0358496	0.252146	0.0575225	-0.804552	-0.423979	-0.763119	0	0	0
1608	555.257	1216.58	0.322718	0.134952	0.396822	0.183787	0.230611	0.128505	0	0	0
1609	444.719	1211.41	0.304505	0.554131	0.767552	0.736194	0.282816	0.18243	0	0	0
1610	442.753	1185.74	0.134477	0.842637	0.804734	-0.789672	-0.104411	0.15159	0	0	0
1611	455.249	1065.85	0.461757	0.192172	0.670123	0.593665	0.73733	0.297995	0	0	0
1612	710.327	1160.23	0.396303	0.239633	0.612055	-0.212828	0.454661	-0.138614	0	0	0
1613	616.325	1163.06	0.515524	0.416041	0.713281	-0.107699	-0.143786	-0.068848	0	0	0
1614	685.354	1158.06	0.738598	0.751923	0.958838	-0.0822039	0.0817351	-0.0135663	0	0	0
1615	585.291	1156.62	0.512433	0.807291	0.511115	0.236663	0.0730844	-0.242771	0	0	0
1616	464.252	1072.7	0.227156	0.244376	0.440977	0.723726	0.455233	0.39677	0	0	0
1617	597.301	1138.95	0.194666	0.278063	0.91123	-0.218721	0.324274	0.0295665	0	0	0
1618	562.758	1141.48	0.895058	0.633698	0.831464	0.0490484	-0.193505	-0.0964914	0	0	0
1619	485.244	1144.91	0.761527	0.726017	0.846717	0.0999376	0.103433	0.0648067	0	0	0
1620	443.745	1144.17	0.378144	0.925988	0.959938	-0.463359	-0.0453052	-0.0316925	0	0	0
1621	580.774	1138.83	0.0498425	0.0831814	0.145293	0.96435	0.432958	0.493069	0	0	0
1622	685.354	1086.5	0.768385	0.481988	0.847852	0.121899	0.268801	0.0735932	0	0	0
1623	428.232	1092.4	0.768825	0.653387	0.63011	-0.141744	-0.215723	-0.240797	0	0	0
1624	455.753	1073.12	0.382849	0.945693	0.923206	0.654424	0.0377137	-0.0627932	0	0	0
1625	509.247	1072.18	0.790224	0.652184	0.588421	0.0796596	-0.127084	-0.167348	0	0	0
1626	413.231	999.593	0.195659	0.257488	0.444246	0.83972	0.606384	0.473254	0	0	0
1627	617.333	1081.29	0.50133	0.543859	0.448272	0.194139	0.166264	0.226217	0	0	0
1628	623.31	1032.39	0.279002	0.402657	0.0521329	0.446384	0.174948	0.434331	0	0	0
1629	412.729	998.557	0.216308	0.24668	0.486145	0.765208	0.612095	0.411478	0	0	0
1630	627.304	1057.28	0.264294	0.454871	0.132739	-0.615456	-0.400838	-0.968745	0	0	0
1631	417.724	1033.34	0.206209	0.334904	0.317809	0.89926	0.360097	0.393167	0	0	0
1632	687.334	1032.86	0.845247	0.644928	0.922359	0.0288105	-0.0879214	0.0209138	0	0	0
1633	457.254	1060.63	0.713141	0.335651	0.711054	-0.107593	-0.238728	-0.0903797	0	0	0
1634	470.245	981.36	0.369831	0.914584	0.59615	-0.279123	-0.0290434	-0.156502	0	0	0
1635	465.247	978.753	0.368469	0.163562	0.331792	0.237739	0.340853	0.221175	0	0	0
1636	386.231	1002.98	0.442198	0.267618	0.662698	0.307057	0.373296	0.195732	0	0	0
1637	504.242	939.471	0.392245	0.972137	0.882565	0.237492	-0.00836486	0.0395117	0	0	0
1638	482.236	968.401	0.917472	0.906689	0.9114	-0.0285855	0.0282049	-0.0278608	0	0	0
1639	532.257	969.585	0.959522	0.665516	0.786251	0.0117218	-0.102297	-0.0696283	0	0	0
1640	413.206	907.047	0.109408	0.133663	0.142862	-1.89858	-1.76451	-1.74792	0	0	0
1641	661.32	900.877	0.487029	0.209727	0.790594	0.271847	0.532014	0.085716	0	0	0
1642	551.262	888.211	0.559302	0.279883	0.906137	0.117299	0.198463	-0.0239658	0	0	0
1643	422.727	914.182	0.820563	0.828915	0.980597	-0.0937225	0.0916185	0.00844541	0	0	0
1644	562.25	890.409	0.82952	0.470618	0.375398	0.0404845	0.124506	0.583172	0	0	0
1645	508.731	901.655	0.797254	0.682572	0.566608	0.168764	-0.153295	-0.304024	0	0	0
1646	561.269	878.862	0.584162	0.967183	0.896682	0.153149	0.00900369	0.0294155	0	0	0
1647	388.202	3470.21	0.17417	0.0271943	0.0854351	0.398255	0.916596	0.792333	0	0	0
1648	402.15	3426.68	0.604892	0.488805	0.227946	-0.149021	0.19537	0.375562	0	0	0
1649	389.035	3407.99	0.834906	0.00689599	0.129731	-0.0369511	0.982972	0.566319	0	0	0
1650	386.011	3382.17	0.682799	0.00629119	0.0467057	0.0877506	0.938496	0.758347	0	0	0
1651	461.21	3307.88	0.258538	0.053171	0.48879	0.474416	0.901067	0.310735	0	0	0
1652	473.042	3305.87	0.461911	0.427594	0.168232	0.325615	0.326092	0.525071	0	0	0
1653	413.299	3228.82	0.200978	0.808354	0.460791	-0.392841	-0.0691638	-0.241823	0	0	0
1654	383.125	3169.79	0.413408	0.112623	0.257201	0.53572	1.31865	0.896961	0	0	0
1655	454.063	3176.65	0.186623	0.0427989	0.10794	0.535476	0.955654	0.844552	0	0	0
1656	417.031	3153.48	0.767947	0.595614	0.42712	-0.112755	0.226615	0.345999	0	0	0
1657	418.026	3070.46	0.639004	0.507331	0.225452	0.210674	0.334597	0.648362	0	0	0
1658	442.031	3034.93	0.743177	0.363534	0.20608	0.128037	0.409117	0.624389	0	0	0
1659	381.107	3002.76	0.224902	0.0304266	0.100162	0.361519	0.813948	2.29435	0	0	0
1660	391.06	2989.08	0.688067	0.211221	0.158171	0.0757499	0.415654	0.622367	0	0	0
1661	399.024	2986.63	0.776498	0.0771742	0.106081	0.0718008	0.725088	0.75714	0	0	0
1662	404.015	2976.66	0.369822	0.140782	0.226042	0.259636	0.770496	0.688548	0	0	0
1663	462.058	2981.24	0.477243	0.144502	0.151618	0.226236	0.874827	0.702543	0	0	0
1664	477.135	2943.27	0.809857	0.785733	0.162199	-0.123735	0.136787	1.1033	0	0	0
1665	438.154	2939.23	0.6649	0.902633	0.0862915	-0.21776	0.0569387	1.61717	0	0	0
1666	491.12	2942.78	0.442197	0.172264	0.184936	0.30063	0.922368	0.851544	0	0	0
1667	417.032	2883.18	0.604809	0.352731	0.703956	-0.170689	0.326931	0.159104	0	0	0
1668	416.023	2870.98	0.426887	0.0628918	0.151581	0.226077	0.581842	0.635406	0	0	0
1669	439.146	2792.62	0.383881	0.268218	0.293995	-0.301137	0.369573	2.48844	0	0	0
1670	399.151	2767.38	0.964326	0.0562727	0.108599	-0.0102113	1.89979	0.518689	0	0	0
1671	407.129	2734.89	0.235957	0.169852	0.385807	-0.256495	0.363101	0.300246	0	0	0
1672	431.306	2628.87	0.54733	0.915928	0.609804	-0.718042	0.102213	-0.600608	0	0	0
1673	481.298	2374.06	0.689741	0.952302	0.942354	0.341577	-0.0399175	0.0592647	0	0	0
1674	482.304	2326.89	0.766483	0.60875	0.584366	-0.150651	0.241934	0.411845	0	0	0
1675	423.086	2215.78	0.333504	0.228745	0.437069	-0.436758	0.514657	0.272279	0	0	0
1676	439.053	2183.48	0.17835	0.523986	0.925781	-0.530524	0.273805	0.0371813	0	0	0
1677	503.091	2099.72	0.457962	0.650435	0.803901	-0.191312	0.114901	0.0572663	0	0	0
1678	481.263	2092.94	0.24134	0.804571	0.962855	-0.393581	0.0703147	-0.0226294	0	0	0
1679	446.103	1952.16	0.205453	0.435981	0.304266	-1.03427	-0.576448	-0.816684	0	0	0
1680	663.339	1930.88	0.084163	0.00522315	0.147411	0.488232	0.685478	0.503787	0	0	0
1681	554.243	1895.5	0.410116	0.528308	0.634391	-0.282719	0.224314	0.1827	0	0	0
1682	852.379	1906.81	0.307556	0.128496	0.0847211	0.223509	0.549561	0.665647	0	0	0
1683	715.356	1902.52	0.280523	0.229646	0.763507	0.572306	1.25849	-0.116419	0	0	0
1684	519.124	1869.82	0.591317	0.865395	0.307506	-0.129434	0.0419951	0.284495	0	0	0
1685	421.081	1847.64	0.942979	0.135836	0.072542	-0.0203873	0.695309	0.574406	0	0	0
1686	438.051	1843.31	0.344218	0.25306	0.162616	-0.321098	0.557653	0.623172	0	0	0
1687	421.09	1826.23	0.57652	0.158883	0.0890763	0.22496	0.498226	0.639582	0	0	0
1688	726.311	1840.07	0.319669	0.617556	0.715932	0.578485	0.260981	-0.218807	0	0	0
1689	438.05	1820.45	0.746118	0.171105	0.127218	-0.133327	0.712562	0.75358	0	0	0
1690	448.111	1823.73	0.137375	0.610926	0.266621	-0.674916	-0.216432	-0.497916	0	0	0
1691	446.11	1799.43	0.155942	0.483922	0.324066	-1.07638	-0.476817	-0.685398	0	0	0
1692	647.323	1795.82	0.412564	0.0700505	0.639778	0.163976	0.36246	0.11758	0	0	0
1693	715.355	1790.87	0.310909	0.712039	0.91831	0.881775	-0.30531	0.0907276	0	0	0
1694	503.259	1796.89	0.477543	0.475733	0.929645	-0.187445	0.180778	0.0260554	0	0	0
1695	503.272	1771.05	0.223551	0.686675	0.937266	-0.330422	0.107528	0.0256931	0	0	0
1696	586.285	1774.95	0.967253	0.550323	0.64492	-0.0100286	0.158866	-0.136128	0	0	0
1697	423.113	1720.03	0.987606	0.0666519	0.134096	0.00531826	0.953704	0.653011	0	0	0
1698	634.291	1720.37	0.135731	0.404696	0.566108	0.450756	0.537273	0.189262	0	0	0
1699	558.295	1686.25	0.726216	0.457019	0.865909	0.177185	0.380833	-0.0899333	0	0	0
1700	450.235	1683.59	0.957856	0.766389	0.821079	0.0255544	0.137904	-0.113478	0	0	0
1701	742.36	1663.19	0.34016	0.0428426	0.774437	0.505928	0.812441	-0.0889618	0	0	0
1702	445.101	1694.41	0.181973	0.468868	0.322171	-1.34807	-0.630279	-0.911924	0	0	0
1703	440.211	1649.24	0.146123	0.0987912	0.308134	0.444392	0.585106	0.377418	0	0	0
1704	614.316	1604.52	0.551513	0.873022	0.998199	-0.254086	0.0690058	0.0011123	0	0	0
1705	503.097	1624.64	0.518937	0.460634	0.569558	-0.264107	0.24858	0.190834	0	0	0
1706	423.201	1586.57	0.403566	0.0196025	0.0597161	0.254502	0.86844	0.472212	0	0	0
1707	593.298	1577.5	0.445502	0.97507	0.822037	-0.135188	0.00743216	-0.0487884	0	0	0
1708	507.251	1545.39	0.698763	0.465571	0.25608	0.0772409	0.18198	0.495328	0	0	0
1709	599.806	1545.54	0.850607	0.573127	0.434075	-0.0515366	-0.190704	-0.235749	0	0	0
1710	445.109	1550.56	0.155821	0.303642	0.353527	-0.96415	-0.644709	-0.560358	0	0	0
1711	728.39	1540.75	0.772799	0.788312	0.929694	-0.143379	-0.121071	-0.0410353	0	0	0
1712	518.745	1539.5	0.794808	0.597263	0.753645	-0.161504	-0.342279	-0.21487	0	0	0
1713	444.219	1508.57	0.960817	0.949184	0.220385	0.0114875	-0.0139335	0.300648	0	0	0
1714	728.394	1509.66	0.471869	0.365876	0.623801	-0.522087	-0.625513	-0.372567	0	0	0
1715	672.346	1343.02	0.691576	0.189102	0.269119	0.104594	0.391608	0.3318	0	0	0
1716	526.243	1391.03	0.51735	0.944871	0.668997	-0.131552	-0.015014	0.0980827	0	0	0
1717	428.237	1359.37	0.615666	0.627593	0.631266	-0.321253	-0.271187	-0.297449	0	0	0
1718	415.224	1312	0.509594	0.150431	0.490992	-0.187843	0.724034	0.242705	0	0	0
1719	434.741	1280.21	0.258504	0.534212	0.841026	-0.933638	-0.454444	0.163849	0	0	0
1720	507.759	1278.79	0.871782	0.673594	0.737802	0.0550765	0.206504	0.137749	0	0	0
1721	488.26	1288.11	0.379381	0.767337	0.551334	0.22928	0.059284	0.132481	0	0	0
1722	714.347	1288.89	0.141246	0.19704	0.0261305	0.447141	0.260817	0.478495	0	0	0
1723	575.777	1273.89	0.476318	0.973522	0.709655	0.478798	-0.016604	0.225821	0	0	0
1724	425.736	1266.16	0.341967	0.337528	0.82192	-0.746904	-0.703603	-0.178439	0	0	0
1725	436.244	1277.35	0.340343	0.380551	0.759531	-0.282052	0.369827	0.120161	0	0	0
1726	564.274	1262.37	0.509176	0.483501	0.997449	0.148745	-0.157912	-0.000650088	0	0	0
1727	507.763	1248.89	0.664933	0.861813	0.691585	-0.160454	0.0802511	0.148978	0	0	0
1728	494.764	1242.13	0.446914	0.442344	0.954507	-0.55621	-0.528106	-0.0388899	0	0	0
1729	441.734	1246.46	0.488805	0.750188	0.596004	-0.247389	-0.163031	-0.16501	0	0	0
1730	416.227	1219.98	0.435011	0.263981	0.19583	-0.251125	0.557932	0.500833	0	0	0
1731	531.731	1256.48	0.082294	0.10142	0.153449	1.50402	1.11096	1.10534	0	0	0
1732	443.251	1239.43	0.387886	0.474044	0.706726	-0.242753	0.26041	0.133037	0	0	0
1733	447.115	1243.63	0.0575635	0.5713	0.268527	-0.827057	-0.279732	-0.429043	0	0	0
1734	571.325	1189.47	0.506809	0.174761	0.512913	0.259817	0.517827	0.269219	0	0	0
1735	437.222	1215.85	0.162806	0.375837	0.582273	-0.328912	0.265342	-0.171033	0	0	0
1736	436.247	1189.18	0.635102	0.37919	0.68723	-0.181405	0.299169	0.159323	0	0	0
1737	508.766	1157.35	0.499667	0.325934	0.95327	0.516823	0.625085	0.0426122	0	0	0
1738	515.274	1158.62	0.184625	0.675422	0.413828	0.655959	0.260146	0.34564	0	0	0
1739	507.764	1153.82	0.452956	0.276072	0.983703	0.654601	0.775702	0.018501	0	0	0
1740	558.281	1156.3	0.247102	0.228296	0.550499	-0.209622	-0.208495	-0.109025	0	0	0
1741	417.221	1142.67	0.0690755	0.219604	0.380283	-1.13887	-0.687522	-0.477167	0	0	0
1742	743.402	1144.02	0.159252	0.819754	0.791297	-0.691174	0.114378	-0.140024	0	0	0
1743	631.294	1134.19	0.278392	0.406109	0.740541	-0.354181	-0.264186	-0.118253	0	0	0
1744	582.273	1112.39	0.449958	0.682902	0.379503	0.30307	0.114229	0.310207	0	0	0
1745	564.262	1095.43	0.0996852	0.155247	0.166171	-1.03718	-0.859278	-0.880192	0	0	0
1746	422.233	993.642	0.0818092	0.128786	0.101352	0.807651	0.599668	0.821714	0	0	0
1747	538.237	1043.7	0.508113	0.513872	0.916953	0.473961	0.421556	0.0809082	0	0	0
1748	725.378	1002.46	0.661797	0.746181	0.528835	0.130892	0.0889532	0.193626	0	0	0
1749	501.249	989.97	0.584298	0.51478	0.934126	-0.125357	-0.148864	-0.0182205	0	0	0
1750	421.734	998.959	0.0866481	0.0778729	0.124439	0.956589	0.77562	0.781068	0	0	0
1751	421.23	1003.47	0.565725	0.376077	0.901221	0.199645	0.224798	-0.0351851	0	0	0
1752	503.235	946.772	0.572417	0.589108	0.77023	0.241475	-0.248566	0.158587	0	0	0
1753	474.245	914.799	0.201866	0.305871	0.292617	-0.472816	-0.352302	-0.411145	0	0	0
1754	575.267	909.957	0.25736	0.968856	0.95733	0.513532	0.0228937	-0.0269171	0	0	0
1755	415.204	900.671	0.28417	0.153033	0.89756	0.588575	0.769718	0.0545661	0	0	0
1756	446.1	3563.13	0.410634	0.85827	0.706106	-0.540448	0.108039	-0.217746	0	0	0
1757	429.069	3552.24	0.36009	0.90182	0.538514	-0.710134	-0.0848213	-0.438086	0	0	0
1758	431.068	3552.31	0.418097	0.879865	0.629757	-0.545933	0.0897207	-0.296968	0	0	0
1759	411.114	3511.65	0.600833	0.149269	0.511505	0.203037	0.41104	0.161497	0	0	0
1760	393.084	3509.71	0.257389	0.725049	0.290669	-0.732328	-0.200021	-0.695984	0	0	0
1761	503.087	3502.3	0.381656	0.666273	0.83784	-0.562142	-0.255636	-0.117214	0	0	0
1762	382.038	3420.14	0.503332	0.607327	0.406188	-0.313602	0.271996	0.355904	0	0	0
1763	430.069	3371.38	0.267623	0.644099	0.494658	-1.10589	-0.382281	-0.600907	0	0	0
1764	419.121	3310.02	0.889198	0.276612	0.420644	0.0436075	0.363424	0.223396	0	0	0
1765	491.24	3170.4	0.76047	0.918213	0.584515	0.166634	0.0457396	-0.211014	0	0	0
1766	403.027	3121.46	0.642199	0.800231	0.540269	0.159493	0.0904192	0.195001	0	0	0
1767	384.018	3068.55	0.663246	0.612822	0.854984	-0.161599	0.251448	0.0800712	0	0	0
1768	395.108	3009.18	0.820626	0.421443	0.886419	0.129097	0.636691	0.0801806	0	0	0
1769	541.256	3036.42	0.226561	0.428425	0.536468	-0.982266	-0.59219	-0.460329	0	0	0
1770	447.071	2998.04	0.524972	0.759906	0.891698	-0.310631	0.162983	-0.0644158	0	0	0
1771	383.125	2956.41	0.515352	0.803146	0.895675	-0.301807	-0.108189	-0.050365	0	0	0
1772	419.106	2959.22	0.606723	0.464413	0.947096	-0.215271	-0.295075	-0.0262641	0	0	0
1773	418.02	2912.81	0.0841308	0.239277	0.0470264	0.550297	0.426252	0.601767	0	0	0
1774	430.07	2903.45	0.278457	0.830917	0.533458	-0.725584	-0.132451	-0.375242	0	0	0
1775	432.31	2868.53	0.638259	0.245883	0.589534	0.393973	0.882211	0.344848	0	0	0
1776	445.102	2869.29	0.217777	0.857741	0.525864	-0.775835	-0.106691	-0.348794	0	0	0
1777	401.025	2793.48	0.913291	0.259364	0.704267	-0.0573539	0.652323	-0.185363	0	0	0
1778	432.074	2809.82	0.177444	0.978709	0.572827	-0.687879	-0.0125911	-0.25487	0	0	0
1779	485.318	2822.91	0.351064	0.801559	0.875136	-0.244656	-0.0564593	-0.0415319	0	0	0
1780	416.309	2811.06	0.438881	0.444155	0.270707	-0.363369	-0.328134	-0.524487	0	0	0
1781	413.632	2810.2	0.574215	0.499344	0.55959	-0.309028	-0.351712	-0.33675	0	0	0
1782	433.295	2802.16	0.573673	0.428647	0.634623	-0.471036	-0.659751	-0.399676	0	0	0
1783	743.389	2784.49	0.903931	0.540777	0.900265	-0.1081	-0.577431	-0.101675	0	0	0
1784	485.311	2786.35	0.320807	0.937677	0.718282	-0.372286	0.0352729	-0.134757	0	0	0
1785	418.004	2770.82	0.276014	0.905931	0.677936	-0.377306	0.0456267	0.156581	0	0	0
1786	452.288	2723.74	0.333308	0.329756	0.709947	-1.63299	-1.64604	-0.505761	0	0	0
1787	444.319	2736.49	0.26567	0.959509	0.226963	-0.611153	-0.025823	-0.717469	0	0	0
1788	426.285	2753.27	0.927569	0.132176	0.407454	-0.0326765	1.40435	0.285388	0	0	0
1789	416.296	2672.52	0.937077	0.614618	0.634039	0.0507429	0.300379	-0.326637	0	0	0
1790	432.305	2730.37	0.583306	0.55278	0.260176	-0.28742	-0.293762	-0.672395	0	0	0
1791	459.297	2713.83	0.922057	0.903351	0.504131	0.0346134	0.0342564	-0.205503	0	0	0
1792	426.295	2672.39	0.361855	0.426469	0.769549	-1.31484	-1.05913	-0.36014	0	0	0
1793	411.282	2660.02	0.118856	0.227776	0.160037	-1.09508	-0.757591	-1.00612	0	0	0
1794	412.283	2704.96	0.18147	0.808596	0.0806175	-0.53401	-0.107092	-0.664619	0	0	0
1795	414.64	2690.69	0.15946	0.633508	0.84615	-0.44737	-0.133699	0.0653238	0	0	0
1796	503.089	2673.3	0.64342	0.388138	0.206934	-0.121528	0.215937	0.279889	0	0	0
1797	486.302	2634.2	0.32227	0.538899	0.782108	-0.546285	-0.315109	-0.146157	0	0	0
1798	425.285	2612.31	0.416783	0.425518	0.668732	-1.23977	-1.20066	-0.611578	0	0	0
1799	459.291	2591.93	0.349032	0.883085	0.431891	-0.492018	-0.0814167	-0.497912	0	0	0
1800	413.686	2560.85	0.491715	0.442622	0.784027	-0.655906	-0.742752	-0.251252	0	0	0
1801	430.296	2550.44	0.221364	0.450708	0.100848	-0.442825	0.777793	-0.56845	0	0	0
1802	595.045	2584.41	0.221401	0.951458	0.30191	-1.38433	0.0522591	-1.12454	0	0	0
1803	445.102	2562.85	0.23744	0.902736	0.615203	-0.811078	-0.0736815	-0.300006	0	0	0
1804	582.136	2552.03	0.803067	0.704153	0.727054	-0.0687514	0.145496	0.104674	0	0	0
1805	472.283	2507.6	0.619226	0.83117	0.598043	-0.328288	-0.130919	-0.360585	0	0	0
1806	412.291	2500.92	0.136553	0.431542	0.235807	-1.24606	-0.580522	-0.951193	0	0	0
1807	461.282	2497.11	0.158561	0.467458	0.120375	-0.483996	-0.235546	-0.555936	0	0	0
1808	544.341	2483.22	0.486111	0.641741	0.957185	-0.588766	-0.362787	0.04671	0	0	0
1809	459.265	2452.85	0.252515	0.277288	0.350518	-0.483489	-0.402573	-0.383222	0	0	0
1810	444.324	2453.75	0.160163	0.286643	0.549475	-0.850934	-0.591007	-0.337959	0	0	0
1811	411.278	2405.37	0.118897	0.20345	0.176763	-1.8716	-1.32016	-1.56446	0	0	0
1812	439.058	2360	0.893832	0.178936	0.164382	-0.072006	1.23526	1.31657	0	0	0
1813	427.265	2377.9	0.184588	0.226493	0.234874	-2.27941	-1.84005	-1.99524	0	0	0
1814	514.269	2367.85	0.118001	0.12985	0.318918	-0.786491	-0.733989	-0.467535	0	0	0
1815	445.28	2339.25	0.11405	0.104669	0.0689522	-0.404294	-0.411028	-0.433507	0	0	0
1816	517.342	2341.11	0.523886	0.738207	0.873613	-0.337502	0.201769	-0.0852942	0	0	0
1817	427.27	2353.41	0.18298	0.325944	0.3905	-1.28337	-0.80989	-0.734467	0	0	0
1818	474.026	2334.53	0.203388	0.440873	0.586369	-0.765978	-0.427295	-0.305491	0	0	0
1819	544.322	2312.8	0.878699	0.717439	0.367075	0.0583307	0.134885	0.401936	0	0	0
1820	432.297	2301.21	0.469418	0.961141	0.689013	-0.410791	0.0238412	-0.232495	0	0	0
1821	444.16	2317.56	0.053688	0.626469	0.921244	-0.567655	-0.129503	-0.0254365	0	0	0
1822	605.03	2321.73	0.676416	0.736145	0.663862	0.209208	-0.136316	0.183656	0	0	0
1823	438.057	2271.48	0.38672	0.0765302	0.06354	0.394203	0.854711	0.745729	0	0	0
1824	421.143	2275.38	0.154963	0.243138	0.259594	-1.43197	-1.03693	-1.06942	0	0	0
1825	403.179	2291.32	0.397069	0.142452	0.0667343	0.337245	0.413227	0.638735	0	0	0
1826	519.121	2256.48	0.603727	0.886645	0.3289	-0.156899	0.0374768	0.251091	0	0	0
1827	387.14	2262.97	0.570426	0.270913	0.122937	-0.153388	0.209259	0.291909	0	0	0
1828	517.31	2225.61	0.327034	0.561453	0.699066	-0.797658	-0.426352	-0.299514	0	0	0
1829	437.068	2248.7	0.518779	0.482198	0.256506	-0.149563	0.201637	0.269157	0	0	0
1830	431.269	2216.4	0.0909656	0.581867	0.252138	-1.27718	-0.362618	-0.855303	0	0	0
1831	432.248	2200.28	0.0735813	0.465899	0.258325	-1.02387	-0.347201	-0.61682	0	0	0
1832	432.079	2169.95	0.234748	0.64586	0.523039	-0.576375	-0.21295	-0.285783	0	0	0
1833	431.271	2182.13	0.05457	0.196209	0.0957803	-1.65637	-0.896493	-1.40855	0	0	0
1834	408.119	2175.7	0.674175	0.347206	0.325839	-0.104359	0.25423	0.247397	0	0	0
1835	447.097	2162.63	0.255921	0.736046	0.521034	-0.565788	-0.162756	-0.279723	0	0	0
1836	664.316	2163.23	0.923774	0.162861	0.27903	0.0173327	0.499317	0.30281	0	0	0
1837	432.202	2134.73	0.782827	0.687063	0.553478	-0.0917301	0.12469	0.179296	0	0	0
1838	432.087	2134.91	0.161292	0.617081	0.418472	-0.685194	-0.228571	-0.360697	0	0	0
1839	403.178	2117.2	0.854476	0.0421634	0.0579319	0.0418281	0.639415	0.562642	0	0	0
1840	416.205	2126.09	0.449891	0.558048	0.526866	-0.131535	0.102588	0.140512	0	0	0
1841	550.223	2121.64	0.804292	0.228142	0.326561	-0.0473565	0.228472	0.222862	0	0	0
1842	575.283	2081.91	0.163147	0.323811	0.956579	-0.387716	0.261107	0.0161448	0	0	0
1843	519.121	2117.09	0.422243	0.616454	0.570212	-0.210559	0.124571	0.118934	0	0	0
1844	576.322	2117.77	0.161919	0.0152511	0.263658	0.329726	0.634537	0.731905	0	0	0
1845	587.302	2103.22	0.942636	0.0657327	0.966485	0.0149012	0.431781	0.00812972	0	0	0
1846	558.267	2094.65	0.811248	0.108114	0.409172	-0.0381751	0.283663	0.139755	0	0	0
1847	459.208	2081.1	0.103716	0.213878	0.705231	-0.281097	0.25371	0.0696105	0	0	0
1848	715.353	2087.26	0.629877	0.237282	0.870435	0.11132	1.18204	-0.0477952	0	0	0
1849	519.125	2086.42	0.559378	0.579444	0.653804	-0.14535	-0.101026	0.0835411	0	0	0
1850	400.232	2060.94	0.344707	0.143188	0.267137	-0.194115	0.492005	0.219951	0	0	0
1851	432.075	2073.41	0.213765	0.692599	0.422472	-0.68061	-0.21992	-0.41492	0	0	0
1852	720.379	2071.52	0.647667	0.506964	0.763538	-0.103706	0.14669	-0.0677771	0	0	0
1853	929.91	1915.55	0.752024	0.758053	0.875228	0.157558	-0.177848	-0.0823812	0	0	0
1854	449.109	2054.99	0.239625	0.871499	0.924979	-0.247327	0.0471785	-0.0216761	0	0	0
1855	589.297	2059.35	0.704658	0.883552	0.257397	-0.0909118	0.0421942	-0.289084	0	0	0
1856	577.307	2066.52	0.362858	0.445496	0.402843	-0.275064	-0.191901	-0.229805	0	0	0
1857	523.196	2054.67	0.476503	0.751111	0.705303	0.273611	0.0864234	0.122714	0	0	0
1858	576.309	2025.51	0.846037	0.158694	0.282583	0.0368159	1.20459	0.594333	0	0	0
1859	555.268	2019.3	0.0893784	0.502168	0.12825	-0.299138	-0.135003	-0.287544	0	0	0
1860	419.23	2043.51	0.286939	0.807135	0.772157	-0.308916	0.0815084	-0.0797408	0	0	0
1861	531.255	2046.65	0.258169	0.0361664	0.645876	-0.156768	0.315484	0.0468895	0	0	0
1862	448.111	2038.17	0.179156	0.785379	0.426695	-0.541895	-0.114698	-0.300978	0	0	0
1863	577.323	2033.47	0.399123	0.168405	0.709197	-0.224296	0.649066	0.105131	0	0	0
1864	531.262	2027.92	0.00146639	0.864727	0.516344	-0.365	0.0217446	0.0912211	0	0	0
1865	643.335	2030.96	0.262533	0.238503	0.724079	-0.124293	0.253107	0.0406749	0	0	0
1866	448.107	2016.05	0.32094	0.890564	0.637731	-0.462846	-0.0631644	-0.200406	0	0	0
1867	532.272	2032.19	0.62808	0.655405	0.733741	-0.0953667	0.0869835	-0.065047	0	0	0
1868	620.332	1996.56	0.493108	0.135405	0.687567	-0.107528	0.347842	0.0824862	0	0	0
1869	575.272	2017.97	0.700429	0.666807	0.474835	-0.109302	0.111396	-0.200627	0	0	0
1870	550.237	2023.65	0.274707	0.810408	0.342973	-0.155511	0.0418775	0.197947	0	0	0
1871	851.675	2002.21	0.518568	0.693576	0.901962	0.607962	-0.354639	0.105705	0	0	0
1872	575.285	1985.2	0.138861	0.0394825	0.0851316	0.235656	0.403375	0.162934	0	0	0
1873	532.27	1978.06	0.427348	0.00764445	0.179418	0.101753	0.341991	0.651315	0	0	0
1874	473.251	1992.72	0.203195	0.0665038	0.813305	-0.162209	0.359278	0.0358366	0	0	0
1875	400.228	1990.84	0.156885	0.146204	0.900877	-0.347007	0.512804	0.0302915	0	0	0
1876	515.258	1984.09	0.43983	0.0829675	0.233757	-0.0996105	0.266812	0.150596	0	0	0
1877	745.857	1992.72	0.109788	0.0868952	0.231135	0.331302	1.11678	0.389849	0	0	0
1878	531.255	1976.56	0.787435	0.0754827	0.267537	-0.0302888	0.300087	0.119148	0	0	0
1879	587.819	1961.41	0.108238	0.187349	0.924699	0.650852	0.708338	-0.0292704	0	0	0
1880	716.356	1989.85	0.345186	0.170239	0.490978	0.164718	1.14141	0.133758	0	0	0
1881	646.327	1971.89	0.165734	0.249088	0.531606	-0.15622	0.165115	0.0879885	0	0	0
1882	564.272	1961.54	0.261673	0.119823	0.199989	-0.110012	0.29547	0.13232	0	0	0
1883	707.39	1967.44	0.300099	0.324266	0.368889	-0.80667	-0.754241	-0.71339	0	0	0
1884	459.238	1961.21	0.43912	0.711142	0.944241	-0.110699	0.0579315	0.0123734	0	0	0
1885	726.339	1951.84	0.165001	0.898035	0.622125	-0.236665	-0.0235385	-0.104716	0	0	0
1886	532.269	1951.7	0.906275	0.165495	0.321202	-0.0192353	0.387367	0.901909	0	0	0
1887	423.051	1948.35	0.300636	0.393436	0.892762	-0.393296	0.305089	-0.0406956	0	0	0
1888	402.173	1956.42	0.22501	0.423202	0.601011	-0.499712	-0.296462	0.203408	0	0	0
1889	868.499	1939.65	0.473223	0.645314	0.511478	-0.292473	-0.201912	-0.273773	0	0	0
1890	587.796	1911.3	0.467326	0.590801	0.396057	0.825904	0.617672	-0.814575	0	0	0
1891	679.809	1929.34	0.454516	0.728996	0.79442	-1.05365	0.545043	-0.338676	0	0	0
1892	575.281	1911.64	0.218055	0.436684	0.188876	-0.356717	-0.208746	-0.389681	0	0	0
1893	548.289	1935.47	0.135911	0.47807	0.377556	-1.31206	-0.600534	-0.667004	0	0	0
1894	545.282	1915.4	0.701987	0.948551	0.621503	-0.0923837	-0.0176326	-0.134896	0	0	0
1895	870.384	1935.06	0.119336	0.0654666	0.948429	0.585947	1.18866	0.0258787	0	0	0
1896	633.768	1920.06	0.495865	0.370688	0.790858	0.165658	0.660203	-0.0743481	0	0	0
1897	591.298	1913.26	0.938487	0.405839	0.595838	0.0108028	0.142238	-0.083181	0	0	0
1898	460.241	1924.89	0.42759	0.592886	0.95192	-0.165624	0.125067	0.0127469	0	0	0
1899	836.356	1914.27	0.464298	0.649791	0.429441	-0.389267	-0.242151	-0.432414	0	0	0
1900	428.235	1912.66	0.125913	0.895358	0.394627	-0.286525	-0.033031	-0.151716	0	0	0
1901	598.325	1892.97	0.879777	0.563284	0.816614	-0.0541965	0.208108	-0.0695854	0	0	0
1902	664.324	1894.72	0.263652	0.850942	0.785355	-0.173694	0.0347405	0.0641529	0	0	0
1903	503.266	1904.72	0.476743	0.0465977	0.114754	-0.134134	0.443907	0.449343	0	0	0
1904	614.304	1879.32	0.305814	0.381729	0.412434	0.295582	0.217017	-0.143437	0	0	0
1905	474.234	1880.37	0.116612	0.189973	0.154859	0.794618	0.33905	0.425535	0	0	0
1906	574.285	1895.57	0.147636	0.371551	0.254512	0.295692	0.285028	-0.184883	0	0	0
1907	618.294	1876.4	0.904691	0.267244	0.226363	0.0423105	-0.328855	0.618494	0	0	0
1908	561.275	1861.02	0.677528	0.492149	0.548774	-0.0871997	0.147345	0.149123	0	0	0
1909	751.366	1880.39	0.628536	0.590726	0.238775	0.130789	0.210251	-0.277086	0	0	0
1910	666.291	1873.75	0.106716	0.616868	0.251445	0.634348	0.12378	0.214047	0	0	0
1911	1020.54	1872.93	0.606864	0.16648	0.761765	-0.33123	-0.949376	-0.187046	0	0	0
1912	553.268	1862.35	0.124222	0.0515209	0.10098	-0.765102	-0.997415	-0.8805	0	0	0
1913	585.297	1870.9	0.322221	0.878433	0.682246	-0.244124	-0.0361439	-0.105264	0	0	0
1914	479.228	1876.72	0.724783	0.602799	0.407197	-0.102626	0.147913	-0.205852	0	0	0
1915	466.248	1862.83	0.36401	0.0994827	0.254534	-0.414389	-0.676391	-0.461889	0	0	0
1916	1021.13	1868	0.812537	0.101771	0.773748	0.147244	-0.807501	0.15072	0	0	0
1917	735.332	1873.71	0.110252	0.594708	0.132245	0.573684	0.0983144	0.281964	0	0	0
1918	652.315	1851.71	0.273119	0.683507	0.569749	-0.305927	-0.126012	-0.141737	0	0	0
1919	872.429	1862.46	0.0926982	0.0901439	0.518964	1.114	1.10443	0.371396	0	0	0
1920	1027.96	1766.71	0.207006	0.0588364	0.173071	-1.02209	-1.86709	-1.21753	0	0	0
1921	629.307	1845.79	0.37788	0.684506	0.936992	-0.245437	0.120561	-0.0261402	0	0	0
1922	804.36	1835.65	0.844437	0.215631	0.407888	-0.153083	-1.1259	-0.703422	0	0	0
1923	528.286	1837.07	0.769869	0.605832	0.97039	-0.070515	-0.126724	0.0100483	0	0	0
1924	405.125	1781.6	0.928785	0.981617	0.747614	0.0394942	-0.00651459	0.0803767	0	0	0
1925	527.235	1818.69	0.978226	0.326003	0.916655	0.010324	-0.264441	0.034674	0	0	0
1926	403.201	1805.88	0.964597	0.518527	0.619851	-0.0085267	0.266987	-0.103072	0	0	0
1927	732.343	1802.85	0.84772	0.683984	0.457756	0.0716523	-0.151605	0.353456	0	0	0
1928	676.331	1823.09	0.463798	0.825217	0.570515	0.224672	0.0369864	0.116677	0	0	0
1929	629.295	1800.71	0.287364	0.473237	0.513589	-0.45077	-0.284653	-0.275825	0	0	0
1930	543.264	1819.33	0.657156	0.277871	0.320143	-0.0837731	-0.199994	-0.198759	0	0	0
1931	504.252	1779.68	0.397818	0.862321	0.871786	-0.177384	0.0350023	-0.0345271	0	0	0
1932	752.355	1800.64	0.345675	0.945148	0.516659	0.154317	-0.0115131	0.0977704	0	0	0
1933	577.034	1806.28	0.746691	0.663632	0.037688	0.101974	0.178123	0.630644	0	0	0
1934	757.363	1779.25	0.248895	0.243106	0.206326	-0.288317	-0.28883	-0.314135	0	0	0
1935	1026.45	1769.47	0.22893	0.148944	0.645131	0.514058	0.630062	0.226004	0	0	0
1936	702.846	1781.8	0.449215	0.247441	0.560536	0.158994	0.632858	0.130763	0	0	0
1937	638.789	1802.83	0.317019	0.277273	0.961942	0.344033	-0.333454	0.0142801	0	0	0
1938	537.239	1777.49	0.849242	0.985536	0.992643	-0.0271993	-0.00345378	-0.00158218	0	0	0
1939	739.35	1779.51	0.137887	0.00834226	0.0282276	-0.343098	-0.670388	-0.628337	0	0	0
1940	729.839	1763.19	0.881595	0.745574	0.376673	0.0638043	0.17337	-0.360258	0	0	0
1941	562.275	1742.36	0.45231	0.588808	0.366724	-0.458795	-0.292345	-0.54022	0	0	0
1942	510.23	1762.88	0.962442	0.789815	0.636573	-0.00864371	0.0605764	0.102357	0	0	0
1943	559.275	1759.15	0.134562	0.468446	0.39304	-0.491356	-0.213134	-0.282492	0	0	0
1944	515.263	1754.23	0.0399341	0.885502	0.491117	-0.340358	0.0334666	-0.124772	0	0	0
1945	512.239	1748	0.32977	0.295047	0.629773	-0.213244	-0.189898	-0.0888178	0	0	0
1946	571.295	1748.42	0.0408454	0.657999	0.662022	-0.335561	-0.0758815	-0.0795739	0	0	0
1947	525.249	1747.43	0.579288	0.898535	0.761403	-0.134551	-0.034596	0.0811658	0	0	0
1948	426.217	1734.65	0.560327	0.145615	0.929952	-0.150505	-0.37506	-0.0251863	0	0	0
1949	723.331	1748.99	0.61901	0.419714	0.906759	-0.155387	-0.242768	0.0384864	0	0	0
1950	687.836	1742.32	0.626824	0.88657	0.446847	0.156686	0.0449966	0.263918	0	0	0
1951	554.752	1726.55	0.92459	0.477867	0.540288	0.0341247	0.300688	0.195524	0	0	0
1952	535.269	1690.8	0.536978	0.356808	0.624724	-0.199385	-0.270942	0.148261	0	0	0
1953	727.375	1703.32	0.0909863	0.800281	0.615048	-0.48545	0.0741016	-0.166766	0	0	0
1954	752.36	1721.65	0.355739	0.737901	0.734794	0.220232	-0.0469004	0.045592	0	0	0
1955	741.821	1719.94	0.633135	0.509532	0.203848	0.173813	0.277989	0.460495	0	0	0
1956	726.353	1723.34	0.10483	0.339551	0.114634	-0.936476	-0.582195	-0.969395	0	0	0
1957	508.251	1716.55	0.665208	0.81073	0.727674	-0.0754647	-0.0412834	0.053093	0	0	0
1958	723.338	1713.71	0.207868	0.535386	0.339317	-0.584607	-0.259666	-0.451972	0	0	0
1959	452.219	1723.66	0.982689	0.893193	0.248954	0.00492678	0.0238572	0.207634	0	0	0
1960	402.201	1716.06	0.854859	0.35027	0.21452	-0.0507797	0.199047	0.258773	0	0	0
1961	619.282	1735.42	0.259597	0.0837783	0.819024	-0.217204	-0.283308	-0.0394146	0	0	0
1962	503.267	1669.85	0.165144	0.83428	0.61512	-0.391978	-0.0721379	0.342962	0	0	0
1963	557.814	1685.55	0.798226	0.33415	0.578262	0.162013	0.626291	0.408841	0	0	0
1964	449.252	1706.51	0.42353	0.510242	0.432651	-0.771436	-0.587992	-0.794007	0	0	0
1965	617.797	1710.3	0.837327	0.613466	0.20417	-0.0387259	-0.0721734	-0.214386	0	0	0
1966	524.239	1684.79	0.788873	0.0113623	0.110135	0.0466831	0.437787	0.36671	0	0	0
1967	504.255	1541.77	0.191239	0.489427	0.221016	-1.98354	-0.810371	-1.9394	0	0	0
1968	696.375	1683.33	0.867767	0.933086	0.288602	0.109387	0.0793399	0.869259	0	0	0
1969	550.266	1694.52	0.426786	0.674424	0.430778	-0.200404	0.090719	0.199309	0	0	0
1970	533.232	1687.97	0.98525	0.906459	0.936318	-0.00929573	-0.0523908	-0.0405555	0	0	0
1971	526.195	1685.08	0.506785	0.0512339	0.333487	0.31469	0.763806	0.636907	0	0	0
1972	661.317	1675.4	0.719269	0.8912	0.720418	0.128077	0.0444954	-0.137388	0	0	0
1973	439.058	1666.94	0.403441	0.649304	0.736344	-0.505157	0.242688	0.1686	0	0	0
1974	537.257	1700.54	0.730051	0.480347	0.297356	0.0595145	0.113974	0.206657	0	0	0
1975	547.266	1675.16	0.0329824	0.907013	0.0483027	-0.262465	0.0247349	-0.249306	0	0	0
1976	459.253	1589.25	0.535743	0.597667	0.591679	-0.276172	-0.224251	0.409214	0	0	0
1977	591.296	1659.84	0.395687	0.204649	0.969247	0.208535	0.305963	0.00860257	0	0	0
1978	476.248	1649.19	0.865941	0.181744	0.468588	0.0389105	0.282911	0.179689	0	0	0
1979	767.347	1642.94	0.686761	0.188842	0.394596	0.212656	-0.515821	-0.357451	0	0	0
1980	674.312	1635.21	0.914911	0.535104	0.581622	0.030923	0.348955	-0.179584	0	0	0
1981	490.236	1625.36	0.81802	0.371754	0.499208	0.044448	0.176488	0.16234	0	0	0
1982	593.304	1628.42	0.147757	0.952851	0.808636	-0.222701	0.0108962	0.0442584	0	0	0
1983	746.35	1618.13	0.319689	0.277201	0.28633	-1.94045	-2.38544	-2.62971	0	0	0
1984	792.369	1636.39	0.98519	0.814901	0.824643	-0.00399195	-0.0590108	-0.0560945	0	0	0
1985	622.309	1617.38	0.733327	0.670323	0.450504	0.0864329	0.107299	-0.170664	0	0	0
1986	720.333	1614.06	0.239339	0.325231	0.489571	0.269532	0.449856	-0.153979	0	0	0
1987	558.797	1619.65	0.654521	0.868856	0.390098	0.168159	0.0564701	0.262179	0	0	0
1988	867.356	1619.48	0.815332	0.566984	0.772297	-0.0926266	-0.213181	0.110074	0	0	0
1989	744.865	1620.1	0.773319	0.290876	0.542254	0.122104	-0.378061	-0.223104	0	0	0
1990	654.309	1614.82	0.325358	0.638399	0.319989	-0.654073	-0.30542	-0.7136	0	0	0
1991	711.32	1609.46	0.0933175	0.341097	0.76647	0.471883	-0.212354	-0.0720688	0	0	0
1992	616.313	1563.43	0.768425	0.304016	0.880358	0.0821689	-0.231179	0.0336009	0	0	0
1993	753.306	1609.9	0.652636	0.127286	0.241071	-0.150829	-0.560004	-0.432555	0	0	0
1994	609.309	1545	0.87448	0.933495	0.585348	0.069477	-0.0493861	0.461648	0	0	0
1995	813.394	1607.15	0.69647	0.192219	0.679748	0.223836	-0.530291	-0.166752	0	0	0
1996	498.247	1603.66	0.226685	0.139321	0.380746	0.272864	0.334633	0.231119	0	0	0
1997	470.246	1596.64	0.566058	0.709051	0.862172	-0.109554	0.0733256	0.0351661	0	0	0
1998	474.241	1574.48	0.113801	0.939433	0.854499	-0.197918	0.0106301	0.0318976	0	0	0
[truncated: 10,911 more rows]
